# Supplementary material
Source: MDPI journal article supplement (https://www.mdpi.com/2218-1997/9/7/334)
Supplement: s1 [file s1]

Title: Estimates of the Surface Magnetic Field Strength of Radio Pulsars

Authors: Vitaliy Kim, Adel Umirbayeva and Yerlan Aimuratov

Table: Sample of radio pulsars with estimated  $\beta$  and  $B_{\rm ns}(\beta)$ .

Byte-by-byte Description of file: catalog\_table\_1.dat

| Bytes | Format | Units | Label | Explanations                                                                         |
|-------|--------|-------|-------|--------------------------------------------------------------------------------------|
| 1- 4  | I4     | ---   | #     | [1/1468] Number of object                                                            |
| 6-16  | A11    | ---   | NAME  | Pulsar name                                                                          |
| 18-27 | A10    | ---   | RA    | Right ascension (J2000) (hh:mm:ss.s)                                                 |
| 29-39 | A11    | ---   | DEC   | Declination (J2000) (+dd:mm:ss)                                                      |
| 41-44 | F4.2   | s     | P0    | Barycentric period of the pulsar                                                     |
| 46-53 | A8     | ---   | P1    | Time derivative of barcycentric period                                               |
| 55-60 | A6     | ms    | W10   | Width of pulse at 10%                                                                |
| 62-66 | F5.2   | deg   | BETA  | Angle between the axis of the magnetic dipole and the axis of rotation of the object |
| 68-75 | A8     | G     | BEXP  | Experimental calculation of the surface magnetic flux density                        |

Notes:

|    |            |            |             |      |          |       |       |          |
|----|------------|------------|-------------|------|----------|-------|-------|----------|
| 1  | J0006+1834 | 00:06:04.8 | +18:34:59   | 0.69 | 2.1e-15  | 195.0 | 1.29  | 5.43e+13 |
| 2  | B0011+47   | 00:14:17.7 | +47:46:33.4 | 1.24 | 5.64e-16 | 142.5 | 2.11  | 2.3e+13  |
| 3  | J0026+6320 | 00:26:50.5 | +63:20:00.8 | 0.32 | 1.51e-16 | 48.0  | 3.22  | 3.94e+12 |
| 4  | B0031-07   | 00:34:08.8 | -07:21:53.4 | 0.94 | 4.08e-16 | 120.0 | 2.20  | 1.64e+13 |
| 5  | J0038-2501 | 00:38:10.2 | -25:01:30.7 | 0.26 | 7.6e-19  | 15.0  | 9.01  | 9.3e+10  |
| 6  | B0037+56   | 00:40:32.3 | +57:16:24.8 | 1.12 | 2.88e-15 | 24.4  | 11.53 | 9.86e+12 |
| 7  | J0045-7319 | 00:45:35.1 | -73:19:03.0 | 0.93 | 4.46e-15 | 220.0 | 1.27  | 9.28e+13 |
| 8  | B0045+33   | 00:48:33.9 | +34:12:08.0 | 1.22 | 2.35e-15 | 31.5  | 9.30  | 1.59e+13 |
| 9  | J0051+0423 | 00:51:30.1 | +04:22:49   | 0.35 | 7e-18    | 34.0  | 4.70  | 6.15e+11 |
| 10 | J0054+6946 | 00:54:59.1 | +69:46:16.8 | 0.83 | 7.19e-16 | 31.0  | 7.81  | 5.76e+12 |
| 11 | B0053+47   | 00:56:25.5 | +47:56:10.5 | 0.47 | 3.33e-15 | 31.3  | 5.85  | 1.25e+13 |
| 12 | J0058+4950 | 00:58:09.9 | +49:50:26.0 | 1.00 | 8.04e-16 | 50.0  | 5.30  | 9.8e+12  |
| 13 | J0100+8023 | 01:00:16.0 | +80:23:41.7 | 1.49 | 3.54e-16 | 67.0  | 4.84  | 8.72e+12 |
| 14 | B0059+65   | 01:02:32.9 | +65:37:13.4 | 1.68 | 5.95e-15 | 110.4 | 3.12  | 5.87e+13 |
| 15 | J0107+1322 | 01:07:39.9 | +13:22:31.7 | 1.20 | 6.87e-16 | 35.7  | 8.13  | 6.49e+12 |
| 16 | J0108-1431 | 01:08:08.3 | -14:31:50.1 | 0.81 | 7.7e-17  | 61.0  | 3.93  | 3.68e+12 |
| 17 | B0105+65   | 01:08:22.5 | +66:08:34.4 | 1.28 | 1.31e-14 | 54.9  | 5.47  | 4.35e+13 |
| 18 | B0105+68   | 01:08:29.5 | +69:05:52.6 | 1.07 | 4.81e-17 | 65.0  | 4.23  | 3.11e+12 |
| 19 | J0113-7220 | 01:13:11.0 | -72:20:32.2 | 0.33 | 4.86e-15 | 12.0  | 12.69 | 5.8e+12  |
| 20 | B0114+58   | 01:17:38.6 | +59:14:38.3 | 0.10 | 5.85e-15 | 8.3   | 10.30 | 4.36e+12 |
| 21 | J0122+1416 | 01:22:01.3 | +14:16:17   | 1.39 | 3.8e-15  | 44.0  | 7.10  | 1.88e+13 |
| 22 | J0133-6957 | 01:33:32.4 | -69:57:29.6 | 0.46 | 1.2e-16  | 18.0  | 10.06 | 1.37e+12 |
| 23 | J0134-2937 | 01:34:18.6 | -29:37:17.0 | 0.14 | 7.84e-17 | 7.1   | 13.96 | 4.35e+11 |
| 24 | J0137+1654 | 01:37:23.8 | +16:54:42.1 | 0.41 | 1.22e-17 | 62.0  | 2.85  | 1.45e+12 |
| 25 | J0137+6349 | 01:37:13.3 | +63:49:34.3 | 0.72 | 9.6e-16  | 58.0  | 3.90  | 1.23e+13 |
| 26 | J0139+5621 | 01:39:38.5 | +56:21:36.8 | 1.78 | 7.91e-14 | 63.0  | 5.60  | 1.23e+14 |
| 27 | B0136+57   | 01:39:19.7 | +58:14:31.8 | 0.27 | 1.07e-14 | 9.6   | 14.54 | 6.88e+12 |
| 28 | B0138+59   | 01:41:39.9 | +60:09:32.3 | 1.22 | 3.91e-16 | 104.2 | 2.84  | 1.41e+13 |
| 29 | B0144+59   | 01:47:44.6 | +59:22:03.2 | 0.20 | 2.57e-16 | 10.1  | 11.71 | 1.12e+12 |
| 30 | B0148-06   | 01:51:22.7 | -06:35:02.9 | 1.46 | 4.43e-16 | 149.0 | 2.18  | 2.14e+13 |
| 31 | B0149-16   | 01:52:10.8 | -16:37:53.6 | 0.83 | 1.3e-15  | 24.0  | 10.11 | 6.8e+12  |
| 32 | B0153+39   | 01:56:55.2 | +39:49:29   | 1.81 | 1.52e-16 | 160.0 | 2.25  | 1.35e+13 |
| 33 | J0201+7005 | 02:01:41.3 | +70:05:18.1 | 1.35 | 5.51e-15 | 49.0  | 6.29  | 2.52e+13 |
| 34 | B0203-40   | 02:06:01.2 | -40:28:03.6 | 0.63 | 1.2e-15  | 19.0  | 11.12 | 4.56e+12 |
| 35 | J0210+5845 | 02:10:55.4 | +58:45:04   | 1.77 | 1.34e-13 | 76.0  | 4.64  | 1.93e+14 |
| 36 | J0211-8159 | 02:11:59.0 | -81:59:36.2 | 1.08 | 2.9e-16  | 129.0 | 2.18  | 1.49e+13 |
| 37 | J0212+5222 | 02:12:52.1 | +52:22:49.5 | 0.38 | 6.6e-15  | 20.0  | 8.16  | 1.12e+13 |
| 38 | J0214+5222 | 02:14:55.2 | +52:22:40.9 | 0.02 | 2.99e-19 | 3.1   | 13.84 | 1.15e+10 |
| 39 | J0215+6218 | 02:15:56.6 | +62:18:33.3 | 0.55 | 6.62e-16 | 105.0 | 1.98  | 1.77e+13 |
| 40 | J0218+4232 | 02:18:06.3 | +42:32:17.3 | 0.00 | 7.74e-20 | 1.46  | 19.06 | 1.31e+9  |
| 41 | B0226+70   | 02:31:13.9 | +70:26:33.8 | 1.47 | 3.11e-15 | 45.9  | 7.00  | 1.77e+13 |
| 42 | J0248+6021 | 02:48:18.6 | +60:21:34.7 | 0.22 | 5.51e-14 | 14.0  | 8.88  | 2.27e+13 |
| 43 | B0254-53   | 02:55:56.2 | -53:04:21.2 | 0.45 | 3.13e-17 | 10.0  | 17.97 | 3.88e+11 |
| 44 | J0302+2252 | 03:02:31.9 | +22:52:12.1 | 1.21 | 8.25e-17 | 59.0  | 4.94  | 3.71e+12 |

|     |             |            |             |      |          |       |       |          |
|-----|-------------|------------|-------------|------|----------|-------|-------|----------|
| 45  | B0301+19    | 03:04:33.1 | +19:32:51.4 | 1.39 | 1.3e-15  | 61.0  | 5.12  | 1.52e+13 |
| 46  | J0324+5239  | 03:24:55.4 | +52:39:31.3 | 0.34 | 3.81e-16 | 81.0  | 2.08  | 9.96e+12 |
| 47  | J0325+6744  | 03:25:05.1 | +67:44:59.3 | 1.36 | 1.55e-15 | 27.0  | 11.51 | 7.38e+12 |
| 48  | J0329+1654  | 03:29:08.5 | +16:54:02   | 0.89 | 2.15e-16 | 37.0  | 6.78  | 3.76e+12 |
| 49  | B0329+54    | 03:32:59.4 | +54:34:43.3 | 0.71 | 2.05e-15 | 31.4  | 7.15  | 9.84e+12 |
| 50  | B0331+45    | 03:35:16.6 | +45:55:53.4 | 0.27 | 7.35e-18 | 10.2  | 13.59 | 1.92e+11 |
| 51  | J0335+6623  | 03:35:57.0 | +66:23:23.6 | 1.76 | 4.81e-15 | 52.0  | 6.77  | 2.5e+13  |
| 52  | B0339+53    | 03:43:12.9 | +53:12:53.4 | 1.93 | 1.34e-14 | 77.1  | 4.78  | 6.18e+13 |
| 53  | J0344-0901  | 03:44:37.4 | -09:01:02.6 | 1.23 | 3.47e-15 | 24.5  | 12.03 | 1.15e+13 |
| 54  | J0348+0432  | 03:48:43.6 | +04:32:11.4 | 0.04 | 2.41e-19 | 5.6   | 9.69  | 1.85e+10 |
| 55  | B0353+52    | 03:57:44.8 | +52:36:57.4 | 0.20 | 4.77e-16 | 26.0  | 4.64  | 3.83e+12 |
| 56  | J0358+4155  | 03:58:03.1 | +41:55:19.0 | 0.23 | 1.46e-16 | 16.0  | 7.94  | 1.33e+12 |
| 57  | B0355+54    | 03:58:53.7 | +54:13:13.7 | 0.16 | 4.39e-15 | 10.8  | 9.79  | 4.93e+12 |
| 58  | J0358+6627  | 03:58:37.9 | +66:27:46.5 | 0.09 | 1.09e-17 | 4.4   | 18.54 | 1.49e+11 |
| 59  | B0403-76    | 04:01:51.7 | -76:08:12.9 | 0.55 | 1.54e-15 | 27.0  | 7.27  | 7.33e+12 |
| 60  | J0402+4825  | 04:02:40.6 | +48:25:57.5 | 0.51 | 2.75e-16 | 87.04 | 2.28  | 9.55e+12 |
| 61  | B0402+61    | 04:06:30.0 | +61:38:41.4 | 0.59 | 5.57e-15 | 32.4  | 6.33  | 1.67e+13 |
| 62  | J0407+1607  | 04:07:54.9 | +16:07:16.4 | 0.03 | 7.9e-20  | 6.6   | 7.18  | 1.15e+10 |
| 63  | B0410+69    | 04:15:55.6 | +69:54:09.8 | 0.39 | 7.66e-17 | 12.1  | 13.79 | 7.34e+11 |
| 64  | J0418-4154  | 04:18:03.7 | -41:54:14.4 | 0.76 | 1.32e-15 | 27.0  | 8.56  | 6.8e+12  |
| 65  | J0421+3255  | 04:21:33.2 | +32:55:50   | 0.90 | 6e-17    | 634.0 | 1.09  | 1.23e+13 |
| 66  | J0426+4933  | 04:26:06.8 | +49:33:38.4 | 0.92 | 3.93e-14 | 28.0  | 9.11  | 3.85e+13 |
| 67  | J0437-4715  | 04:37:15.8 | -47:15:09.1 | 0.01 | 5.73e-20 | 1.02  | 21.17 | 1.61e+9  |
| 68  | J0448-2749  | 04:48:41.5 | -27:49:46.7 | 0.45 | 1.48e-16 | 21.0  | 8.50  | 1.77e+12 |
| 69  | B0447-12    | 04:50:08.7 | -12:48:07.1 | 0.44 | 1.03e-16 | 36.0  | 4.91  | 2.51e+12 |
| 70  | B0450-18    | 04:52:34.1 | -17:59:23.3 | 0.55 | 5.75e-15 | 37.0  | 5.33  | 1.93e+13 |
| 71  | J0454+4529  | 04:54:59.3 | +45:29:46.7 | 1.39 | 4.89e-15 | 48.3  | 6.47  | 2.34e+13 |
| 72  | B0450+55    | 04:54:07.7 | +55:43:41.4 | 0.34 | 2.37e-15 | 29.1  | 5.37  | 9.72e+12 |
| 73  | B0456-69    | 04:55:47.5 | -69:51:34.3 | 0.32 | 1.02e-14 | 9.4   | 16.13 | 6.58e+12 |
| 74  | J0458-0505  | 04:58:37.1 | -05:05:05.1 | 1.88 | 5.3e-16  | 40.0  | 9.10  | 6.39e+12 |
| 75  | J0459-0210  | 04:59:51.9 | -02:10:06.6 | 1.13 | 1.4e-15  | 43.0  | 6.57  | 1.11e+13 |
| 76  | B0458+46    | 05:02:04.5 | +46:54:06.0 | 0.64 | 5.58e-15 | 36.6  | 5.81  | 1.89e+13 |
| 77  | J0509+3801  | 05:09:31.7 | +38:01:18.0 | 0.08 | 7.93e-18 | 12.0  | 6.35  | 2.25e+11 |
| 78  | J0514-4408  | 05:14:52.1 | -44:08:37.3 | 0.32 | 2.04e-15 | 30.6  | 4.96  | 9.45e+12 |
| 79  | J0517+2212  | 05:17:17.1 | +22:12:51.9 | 0.22 | 1.16e-17 | 38.0  | 3.44  | 8.56e+11 |
| 80  | J0518+5416  | 05:18:53.1 | +54:16:50.0 | 0.34 | 1.68e-15 | 20.0  | 7.77  | 5.66e+12 |
| 81  | J0519-6932  | 05:19:46.9 | -69:32:23.4 | 0.26 | 6.97e-16 | 10.0  | 13.71 | 1.83e+12 |
| 82  | J0520-2553  | 05:20:36.1 | -25:53:12.2 | 0.24 | 3.01e-17 | 13.0  | 10.08 | 4.93e+11 |
| 83  | B0523+11    | 05:25:56.4 | +11:15:19.0 | 0.35 | 7.36e-17 | 17.0  | 9.32  | 1.89e+12 |
| 84  | J0529-0715  | 05:29:08.9 | -07:15:26.4 | 0.69 | 5.75e-16 | 26.3  | 8.38  | 4.37e+12 |
| 85  | B0529-66    | 05:29:50.9 | -66:52:39.9 | 0.98 | 1.55e-14 | 41.0  | 6.39  | 3.53e+13 |
| 86  | J0533+0402  | 05:33:25.8 | +04:01:59.7 | 0.96 | 1.6e-16  | 24.0  | 10.87 | 2.11e+12 |
| 87  | B0531+21    | 05:34:31.9 | +22:00:52.0 | 0.03 | 4.21e-13 | 4.7   | 10.67 | 2.49e+13 |
| 88  | B0538-75    | 05:36:30.8 | -75:43:54.8 | 1.25 | 5.78e-16 | 95.0  | 3.13  | 1.57e+13 |
| 89  | J0538+2817  | 05:38:25.0 | +28:17:09.1 | 0.14 | 3.67e-15 | 13.9  | 7.32  | 5.76e+12 |
| 90  | J0540+3207  | 05:40:37.1 | +32:07:37.3 | 0.52 | 4.48e-16 | 17.0  | 11.34 | 2.49e+12 |
| 91  | B0540-69    | 05:40:11.2 | -69:19:54.1 | 0.05 | 4.79e-13 | 22.47 | 3.75  | 7.62e+13 |
| 92  | J0540-7125  | 05:40:30.8 | -71:25:31.4 | 1.29 | 8.2e-16  | 70.0  | 4.30  | 1.39e+13 |
| 93  | B0540+23    | 05:43:09.6 | +23:29:05   | 0.25 | 1.54e-14 | 16.0  | 8.27  | 1.37e+13 |
| 94  | J0557-2948  | 05:57:32.9 | -29:48:16.8 | 0.04 | 7.3e-20  | 2.5   | 22.78 | 4.67e+9  |
| 95  | B0559-05    | 06:01:58.9 | -05:27:50.8 | 0.40 | 1.3e-15  | 24.0  | 6.98  | 5.97e+12 |
| 96  | J0609+2130  | 06:09:58.8 | +21:30:02.8 | 0.06 | 2.35e-19 | 7.4   | 8.70  | 2.42e+10 |
| 97  | J0610-2100  | 06:10:13.5 | -21:00:27.8 | 0.00 | 1.23e-20 | 0.81  | 22.36 | 5.8e+8   |
| 98  | J0611+1436  | 06:11:18.6 | +14:36:52   | 0.27 | 4e-15    | 33.0  | 4.27  | 1.41e+13 |
| 99  | B0609+37    | 06:12:48.6 | +37:21:37.3 | 0.30 | 5.95e-17 | 17.7  | 8.22  | 9.43e+11 |
| 100 | J0612+37216 | 06:12:44.1 | +37:21:40   | 0.44 | 1.5e-16  | 26.0  | 6.82  | 2.2e+12  |
| 101 | J0613-0200  | 06:13:43.9 | -02:00:47.2 | 0.00 | 9.59e-21 | 0.92  | 18.85 | 5.37e+8  |
| 102 | J0613+3731  | 06:13:12.1 | +37:31:38.3 | 0.62 | 3.24e-15 | 28.0  | 7.47  | 1.1e+13  |
| 103 | B0611+22    | 06:14:17.0 | +22:29:56.8 | 0.33 | 5.94e-14 | 13.0  | 11.87 | 2.19e+13 |
| 104 | J0614-3329  | 06:14:10.3 | -33:29:54.1 | 0.00 | 1.75e-20 | 0.63  | 26.03 | 5.41e+8  |
| 105 | J0621+0336  | 06:21:11.2 | +03:36:45.5 | 0.27 | 7.24e-18 | 5.5   | 25.82 | 1.27e+11 |
| 106 | J0621+1002  | 06:21:22.1 | +10:02:38.7 | 0.03 | 4.73e-20 | 10.16 | 5.47  | 1.24e+10 |
| 107 | B0621-04    | 06:24:20.0 | -04:24:50.4 | 1.04 | 8.3e-16  | 63.0  | 4.30  | 1.25e+13 |
| 108 | J0627+0649  | 06:27:53.6 | +06:49:54.1 | 0.35 | 1.7e-15  | 17.0  | 9.22  | 4.85e+12 |
| 109 | J0627+0706  | 06:27:44.1 | +07:06:33.0 | 0.48 | 2.98e-14 | 9.3   | 20.00 | 1.11e+13 |

|     |             |            |             |      |          |       |       |          |
|-----|-------------|------------|-------------|------|----------|-------|-------|----------|
| 110 | B0626+24    | 06:29:05.7 | +24:15:41.5 | 0.48 | 2e-15    | 23.0  | 7.98  | 7.12e+12 |
| 111 | J0630-0046  | 06:30:26.9 | -00:46:05.8 | 0.68 | 3.75e-15 | 29.0  | 7.56  | 1.23e+13 |
| 112 | B0628-28    | 06:30:49.4 | -28:34:42.7 | 1.24 | 7.12e-15 | 122.0 | 2.45  | 7.36e+13 |
| 113 | J0631+1036  | 06:31:27.5 | +10:37:02.5 | 0.29 | 1.05e-13 | 20.0  | 7.16  | 4.46e+13 |
| 114 | J0636-4549  | 06:36:33.7 | -45:49:32.6 | 1.98 | 3.17e-15 | 37.0  | 10.11 | 1.45e+13 |
| 115 | J0636+5128  | 06:36:04.8 | +51:28:59.9 | 0.00 | 3.45e-21 | 0.29  | 59.95 | 1.16e+8  |
| 116 | J0645+5158  | 06:45:59.0 | +51:58:14.9 | 0.01 | 4.92e-21 | 0.6   | 46.73 | 2.9e+8   |
| 117 | J0646+0905  | 06:46:31.0 | +09:05:49.6 | 0.90 | 7.36e-16 | 42.0  | 6.01  | 7.88e+12 |
| 118 | J0647+0913  | 06:47:15.6 | +09:13:59.5 | 1.23 | 6.42e-15 | 31.0  | 9.52  | 1.72e+13 |
| 119 | J0652-0142  | 06:52:11.1 | -01:42:30.3 | 0.92 | 1.52e-16 | 24.0  | 10.65 | 2.52e+12 |
| 120 | B0643+80    | 06:53:15.0 | +80:52:00.2 | 1.21 | 3.8e-15  | 41.9  | 6.98  | 1.79e+13 |
| 121 | J0656-2228  | 06:56:30.2 | -22:28:25.5 | 1.22 | 2.67e-17 | 29.0  | 10.14 | 1.4e+12  |
| 122 | J0656-5449  | 06:56:48.9 | -54:49:14.9 | 0.18 | 3.19e-17 | 10.2  | 11.21 | 3.98e+11 |
| 123 | B0656+14    | 06:59:48.1 | +14:14:19.4 | 0.38 | 5.49e-14 | 32.0  | 5.18  | 5.15e+13 |
| 124 | B0655+64    | 07:00:37.8 | +64:18:11.2 | 0.20 | 6.85e-19 | 10.0  | 11.81 | 5.72e+10 |
| 125 | J0709+0458  | 07:09:08.3 | +04:58:51.4 | 0.03 | 3.8e-19  | 4.0   | 12.63 | 1.67e+10 |
| 126 | J0709-5923  | 07:09:32.5 | -59:23:55.6 | 0.49 | 1.26e-16 | 9.5   | 19.76 | 7.4e+11  |
| 127 | J0711+0931  | 07:11:36.1 | +09:31:25   | 1.21 | 4e-16    | 42.0  | 6.96  | 5.82e+12 |
| 128 | J0711-6830  | 07:11:54.1 | -68:30:47.3 | 0.01 | 1.49e-20 | 2.57  | 11.32 | 1.47e+9  |
| 129 | J0719-2545  | 07:19:07.3 | -25:45:00.2 | 0.97 | 7.28e-15 | 28.0  | 9.36  | 1.66e+13 |
| 130 | J0721-2038  | 07:21:42.9 | -20:38:07.0 | 0.02 | 4.4e-20  | 3.0   | 11.76 | 4.11e+9  |
| 131 | J0725-1635  | 07:25:00.4 | -16:35:45.8 | 0.42 | 9.26e-17 | 10.0  | 17.48 | 6.68e+11 |
| 132 | J0729-1448  | 07:29:16.4 | -14:48:36.8 | 0.25 | 1.13e-13 | 18.0  | 7.44  | 4.17e+13 |
| 133 | B0727-18    | 07:29:32.3 | -18:36:42.2 | 0.51 | 1.9e-14  | 25.0  | 7.60  | 2.38e+13 |
| 134 | J0733-2345  | 07:33:24.6 | -23:45:56.2 | 1.80 | 5.7e-15  | 58.0  | 6.12  | 3.35e+13 |
| 135 | J0737-2202  | 07:37:44.0 | -22:02:05.3 | 0.32 | 5.47e-15 | 28.0  | 5.41  | 1.42e+13 |
| 136 | J0737-3039A | 07:37:51.2 | -30:39:40.7 | 0.02 | 1.76e-18 | 15.1  | 6.35  | 5.78e+10 |
| 137 | B0736-40    | 07:38:32.2 | -40:42:39.4 | 0.37 | 1.38e-15 | 39.0  | 4.22  | 9.88e+12 |
| 138 | J0740+6620  | 07:40:45.7 | +66:20:33.5 | 0.00 | 1.22e-20 | 0.85  | 19.72 | 5.63e+8  |
| 139 | B0740-28    | 07:42:49.0 | -28:22:43.7 | 0.17 | 1.68e-14 | 7.2   | 15.20 | 6.46e+12 |
| 140 | B0743-53    | 07:45:04.4 | -53:53:09.5 | 0.21 | 2.19e-15 | 30.0  | 4.22  | 9.44e+12 |
| 141 | J0747+6646  | 07:47:39.6 | +66:46:56.7 | 0.41 | 6.78e-16 | 21.0  | 8.09  | 3.78e+12 |
| 142 | J0749-4247  | 07:49:49.6 | -42:47:42.1 | 1.10 | 9.77e-16 | 27.0  | 10.30 | 5.85e+12 |
| 143 | B0751+32    | 07:54:40.6 | +32:31:56.2 | 1.44 | 1.08e-15 | 99.7  | 3.21  | 2.26e+13 |
| 144 | B0756-15    | 07:58:29.0 | -15:28:08.7 | 0.68 | 1.62e-15 | 11.0  | 20.25 | 3.73e+12 |
| 145 | J0803-0942  | 08:03:26.8 | -09:42:50.8 | 0.57 | 1.16e-15 | 15.8  | 12.75 | 3.73e+12 |
| 146 | J0807-5421  | 08:07:47.1 | -54:21:26.4 | 0.53 | 3.78e-16 | 17.0  | 11.36 | 2.29e+12 |
| 147 | J0808-3937  | 08:08:11.6 | -39:37:52.9 | 0.87 | 4.01e-16 | 30.0  | 8.24  | 4.16e+12 |
| 148 | B0808-47    | 08:09:43.8 | -47:53:54.7 | 0.55 | 3.08e-15 | 25.0  | 7.86  | 9.6e+12  |
| 149 | J0812-3905  | 08:12:14.8 | -39:05:48.9 | 0.48 | 4.49e-17 | 47.0  | 3.97  | 2.15e+12 |
| 150 | B0809+74    | 08:14:59.5 | +74:29:05.7 | 1.29 | 1.68e-16 | 89.5  | 3.38  | 7.99e+12 |
| 151 | J0815+0939  | 08:15:08.7 | +09:39:50.7 | 0.65 | 1.39e-16 | 183.0 | 1.33  | 1.31e+13 |
| 152 | J0815+4611  | 08:15:59.4 | +46:11:53.2 | 0.43 | 3.9e-18  | 21.0  | 8.35  | 2.87e+11 |
| 153 | J0818-3049  | 08:18:49.3 | -30:49:31   | 0.76 | 5.8e-16  | 84.0  | 2.80  | 1.38e+13 |
| 154 | B0818-13    | 08:20:26.3 | -13:50:55.8 | 1.24 | 2.11e-15 | 34.0  | 8.68  | 1.83e+13 |
| 155 | J0820-3826  | 08:20:59.9 | -38:26:42.9 | 0.12 | 2.44e-15 | 13.0  | 7.33  | 4.38e+12 |
| 156 | J0820-3921  | 08:20:49.1 | -39:21:55.7 | 1.07 | 1.22e-14 | 106.0 | 2.62  | 8.5e+13  |
| 157 | B0818-41    | 08:20:15.4 | -41:14:35.2 | 0.55 | 1.98e-17 | 175.0 | 1.33  | 4.54e+12 |
| 158 | J0821-4221  | 08:21:44.6 | -42:21:25.4 | 0.40 | 3.48e-15 | 23.0  | 7.29  | 9.37e+12 |
| 159 | B0820+02    | 08:23:09.7 | +01:59:12.4 | 0.86 | 1.05e-16 | 33.0  | 7.48  | 2.34e+12 |
| 160 | B0823+26    | 08:26:51.5 | +26:37:21.2 | 0.53 | 1.71e-15 | 12.4  | 15.72 | 3.56e+12 |
| 161 | B0826-34    | 08:28:16.6 | -34:17:07   | 1.85 | 9.96e-16 | 913.0 | 0.61  | 1.29e+14 |
| 162 | J0831-4406  | 08:31:32.4 | -44:06:11.9 | 0.31 | 1.28e-15 | 16.0  | 9.29  | 3.96e+12 |
| 163 | J0835-3707  | 08:35:03.0 | -37:07:51.5 | 0.54 | 9.78e-15 | 11.0  | 17.97 | 7.55e+12 |
| 164 | B0833-45    | 08:35:20.6 | -45:10:34.8 | 0.09 | 1.25e-13 | 3.8   | 21.32 | 9.3e+12  |
| 165 | J0836-4233  | 08:36:05.8 | -42:33:24.9 | 0.74 | 1.32e-15 | 25.91 | 8.81  | 6.52e+12 |
| 166 | B0834+06    | 08:37:05.6 | +06:10:14.5 | 1.27 | 6.8e-15  | 34.0  | 8.81  | 1.94e+13 |
| 167 | B0835-41    | 08:37:21.1 | -41:35:14.5 | 0.75 | 3.54e-15 | 18.0  | 12.84 | 7.43e+12 |
| 168 | J0838-2621  | 08:38:18.8 | -26:21:29.5 | 0.31 | 3.9e-17  | 36.0  | 4.17  | 1.53e+12 |
| 169 | B0839-53    | 08:40:33.7 | -53:32:35.9 | 0.72 | 1.64e-15 | 32.0  | 7.04  | 8.97e+12 |
| 170 | B0840-48    | 08:42:05.4 | -48:51:20.6 | 0.64 | 9.56e-15 | 13.0  | 16.54 | 8.82e+12 |
| 171 | J0843-5022  | 08:43:09.8 | -50:22:43.1 | 0.21 | 1.72e-16 | 11.0  | 11.09 | 9.97e+11 |
| 172 | B0844-35    | 08:46:06.0 | -35:33:41.2 | 1.12 | 1.6e-15  | 75.0  | 3.75  | 2.68e+13 |
| 173 | J0849-6322  | 08:49:42.5 | -63:22:35.0 | 0.37 | 7.91e-16 | 24.0  | 6.74  | 4.65e+12 |
| 174 | B0841+80    | 08:49:01.5 | +80:28:59.1 | 1.60 | 4.46e-16 | 93.0  | 3.62  | 1.36e+13 |

|     |            |            |             |      |          |       |       |          |
|-----|------------|------------|-------------|------|----------|-------|-------|----------|
| 175 | B0853-33   | 08:55:38.4 | -33:31:39.3 | 1.27 | 6.32e-15 | 29.0  | 10.31 | 1.6e+13  |
| 176 | J0855-4658 | 08:55:19.5 | -46:58:22.6 | 0.58 | 1.36e-14 | 24.0  | 8.40  | 1.94e+13 |
| 177 | B0855-61   | 08:56:59.2 | -61:37:52.7 | 0.96 | 1.68e-15 | 38.0  | 6.85  | 1.79e+13 |
| 178 | J0857-4424 | 08:57:55.8 | -44:24:10.6 | 0.33 | 2.09e-14 | 18.0  | 8.46  | 1.8e+13  |
| 179 | J0900-3144 | 09:00:43.9 | -31:44:30.8 | 0.01 | 4.89e-20 | 3.5   | 9.46  | 4.54e+9  |
| 180 | J0901-4624 | 09:01:40.1 | -46:24:48.5 | 0.44 | 8.75e-14 | 35.0  | 5.07  | 7.12e+13 |
| 181 | B0901-63   | 09:02:32.4 | -63:25:12.0 | 0.66 | 1.07e-16 | 28.0  | 7.71  | 2.53e+12 |
| 182 | B0903-42   | 09:04:59.0 | -42:46:13.4 | 0.97 | 1.88e-15 | 31.0  | 8.41  | 9.32e+12 |
| 183 | B0904-74   | 09:04:10.4 | -74:59:41.7 | 0.55 | 4.61e-16 | 30.0  | 6.57  | 4.45e+12 |
| 184 | J0905-4536 | 09:05:23.9 | -45:36:53.0 | 0.99 | 1.49e-16 | 190.0 | 1.47  | 1.51e+13 |
| 185 | J0905-5127 | 09:05:51.9 | -51:27:54.0 | 0.35 | 2.49e-14 | 11.0  | 14.30 | 1.2e+13  |
| 186 | J0905-6019 | 09:05:15.2 | -60:19:22.0 | 0.34 | 5.22e-16 | 13.0  | 11.97 | 2.58e+12 |
| 187 | B0905-51   | 09:07:15.9 | -51:57:59.3 | 0.25 | 1.83e-15 | 23.0  | 5.87  | 6.74e+12 |
| 188 | B0906-17   | 09:08:38.1 | -17:39:37.6 | 0.40 | 6.69e-16 | 22.0  | 7.67  | 3.93e+12 |
| 189 | B0906-49   | 09:08:35.4 | -49:13:05.0 | 0.11 | 1.51e-14 | 4.4   | 20.07 | 3.74e+12 |
| 190 | B0909-71   | 09:09:35.8 | -72:12:08.9 | 1.36 | 3.27e-16 | 84.0  | 3.70  | 1.48e+13 |
| 191 | J0912-3851 | 09:12:42.7 | -38:51:03   | 1.53 | 3.59e-15 | 45.0  | 7.28  | 1.87e+13 |
| 192 | J0919-6040 | 09:19:27.8 | -60:40:50.4 | 1.22 | 1e-17    | 44.0  | 6.65  | 9.64e+11 |
| 193 | B0917+63   | 09:21:14.1 | +62:54:13.9 | 1.57 | 3.61e-15 | 49.4  | 6.72  | 2.58e+13 |
| 194 | B0919+06   | 09:22:14.0 | +06:38:23.3 | 0.43 | 1.37e-14 | 14.0  | 12.50 | 1.14e+13 |
| 195 | J0922-4949 | 09:22:14.9 | -49:49:12.0 | 0.95 | 9.76e-14 | 26.0  | 9.96  | 5.63e+13 |
| 196 | B0922-52   | 09:24:08.7 | -53:02:42.6 | 0.75 | 3.53e-14 | 23.0  | 9.98  | 3.0e+13  |
| 197 | B0923-58   | 09:24:30.8 | -58:14:05.1 | 0.74 | 4.92e-15 | 82.0  | 2.83  | 3.91e+13 |
| 198 | J0930-2301 | 09:30:02.8 | -23:01:45   | 1.81 | 3.36e-15 | 60.0  | 5.94  | 2.41e+13 |
| 199 | J0931-1902 | 09:31:19.1 | -19:02:55.0 | 0.00 | 3.63e-21 | 1.4   | 15.17 | 5.18e+8  |
| 200 | J0932-3217 | 09:32:39.1 | -32:17:14.2 | 1.93 | 2.5e-16  | 41.0  | 8.99  | 4.5e+12  |
| 201 | J0934-4154 | 09:34:58.2 | -41:54:19.5 | 0.57 | 2.69e-16 | 27.0  | 7.43  | 3.64e+12 |
| 202 | B0932-52   | 09:34:28.2 | -52:49:27.3 | 1.44 | 4.65e-15 | 42.0  | 7.59  | 1.99e+13 |
| 203 | J0940-5428 | 09:40:58.2 | -54:28:40.6 | 0.09 | 3.29e-14 | 10.0  | 8.01  | 1.23e+13 |
| 204 | J0941-5244 | 09:41:41.1 | -52:44:04.4 | 0.66 | 1.14e-15 | 24.0  | 8.98  | 5.61e+12 |
| 205 | B0940-55   | 09:42:14.8 | -55:52:55.1 | 0.66 | 2.27e-14 | 46.0  | 4.72  | 4.77e+13 |
| 206 | B0941-56   | 09:42:54.4 | -56:57:43.2 | 0.81 | 3.96e-14 | 13.0  | 18.59 | 1.8e+13  |
| 207 | B0940+16   | 09:43:30.1 | +16:31:37   | 1.09 | 9.11e-17 | 144.0 | 1.97  | 9.27e+12 |
| 208 | B0942-13   | 09:44:28.9 | -13:54:41.6 | 0.57 | 4.53e-17 | 11.0  | 18.45 | 5.14e+11 |
| 209 | J0945-4833 | 09:45:38.2 | -48:33:14.5 | 0.33 | 4.83e-15 | 11.0  | 13.99 | 5.3e+12  |
| 210 | B0943+10   | 09:46:07.6 | +09:51:55   | 1.10 | 3.49e-15 | 70.9  | 3.93  | 2.89e+13 |
| 211 | J0947+2740 | 09:47:21.2 | +27:40:43.5 | 0.85 | 4.3e-16  | 49.0  | 5.00  | 7.17e+12 |
| 212 | J0949-6902 | 09:49:20.5 | -69:02:41.6 | 0.64 | 6.37e-16 | 15.0  | 14.24 | 2.63e+12 |
| 213 | B0950-38   | 09:52:17.2 | -38:39:10.2 | 1.37 | 5.8e-16  | 70.0  | 4.44  | 1.17e+13 |
| 214 | B0950+08   | 09:53:09.3 | +07:55:35.7 | 0.25 | 2.3e-16  | 21.0  | 6.41  | 2.19e+12 |
| 215 | J0954-5430 | 09:54:06.0 | -54:30:52.8 | 0.47 | 4.39e-14 | 18.0  | 10.16 | 2.61e+13 |
| 216 | B0953-52   | 09:55:29.4 | -53:04:16.6 | 0.86 | 3.53e-15 | 30.0  | 8.22  | 1.24e+13 |
| 217 | J0957-5432 | 09:57:56.0 | -54:32:03.9 | 0.20 | 1.95e-15 | 6.4   | 18.99 | 1.96e+12 |
| 218 | B0957-47   | 09:59:26.2 | -48:09:47.4 | 0.67 | 8.47e-17 | 120.0 | 1.90  | 7.27e+12 |
| 219 | J1000-5149 | 10:00:28.1 | -51:49:58.1 | 0.26 | 9.59e-16 | 8.7   | 15.57 | 1.87e+12 |
| 220 | B0959-54   | 10:01:37.8 | -55:07:07.8 | 1.44 | 5.16e-14 | 27.0  | 11.81 | 4.26e+13 |
| 221 | J1001-5559 | 10:01:08.6 | -55:59:00.2 | 1.66 | 8.6e-16  | 55.0  | 6.21  | 1.12e+13 |
| 222 | J1002-5919 | 10:02:20.5 | -59:19:37.2 | 0.71 | 1.04e-16 | 69.1  | 3.28  | 4.82e+12 |
| 223 | B1001-47   | 10:03:21.5 | -47:47:01.1 | 0.31 | 2.07e-15 | 17.0  | 8.68  | 5.34e+12 |
| 224 | J1006-6311 | 10:06:36.6 | -63:11:41.2 | 0.84 | 5.73e-16 | 26.0  | 9.34  | 4.31e+12 |
| 225 | J1012+5307 | 10:12:33.4 | +53:07:02.2 | 0.01 | 1.71e-20 | 1.7   | 13.59 | 1.29e+9  |
| 226 | B1011-58   | 10:12:48.4 | -58:57:48.5 | 0.82 | 1.78e-14 | 22.0  | 10.95 | 2.36e+13 |
| 227 | J1013-5934 | 10:13:31.8 | -59:34:26.6 | 0.44 | 5.56e-16 | 36.0  | 4.94  | 5.83e+12 |
| 228 | J1015-5719 | 10:15:37.9 | -57:19:12.8 | 0.14 | 5.74e-14 | 63.0  | 2.25  | 7.32e+13 |
| 229 | B1014-53   | 10:16:31.1 | -53:45:14.2 | 0.77 | 1.93e-15 | 16.0  | 14.65 | 4.88e+12 |
| 230 | J1017+3011 | 10:17:36.2 | +30:11:46.1 | 0.45 | 5.7e-16  | 38.8  | 4.64  | 6.36e+12 |
| 231 | B1015-56   | 10:17:12.8 | -56:21:30.5 | 0.50 | 3.14e-15 | 13.0  | 14.58 | 5.53e+12 |
| 232 | B1016-16   | 10:18:40.3 | -16:42:10.1 | 1.80 | 1.74e-15 | 49.0  | 7.27  | 1.42e+13 |
| 233 | J1020-5921 | 10:20:14.0 | -59:21:34   | 1.24 | 4.05e-14 | 34.0  | 8.69  | 4.75e+13 |
| 234 | J1020-6026 | 10:20:11.4 | -60:26:06.3 | 0.14 | 6.74e-15 | 26.0  | 4.03  | 1.4e+13  |
| 235 | J1022+1001 | 10:22:57.9 | +10:01:52.6 | 0.02 | 4.33e-20 | 1.96  | 17.98 | 2.77e+9  |
| 236 | J1024-0719 | 10:24:38.6 | -07:19:19.5 | 0.01 | 1.86e-20 | 1.51  | 14.68 | 1.24e+9  |
| 237 | B1030-58   | 10:32:04.8 | -59:11:54.8 | 0.46 | 1.8e-15  | 17.0  | 10.67 | 5.0e+12  |
| 238 | J1034-3224 | 10:34:19.5 | -32:24:26.0 | 1.15 | 2.3e-16  | 306.0 | 1.04  | 2.86e+13 |
| 239 | J1035-6345 | 10:35:03.0 | -63:45:18.4 | 0.58 | 3.5e-16  | 13.0  | 15.67 | 1.69e+12 |



|     |            |            |             |      |          |       |       |          |
|-----|------------|------------|-------------|------|----------|-------|-------|----------|
| 240 | J1036-4926 | 10:36:13.1 | -49:26:21.2 | 0.51 | 1.65e-15 | 17.0  | 11.19 | 4.79e+12 |
| 241 | J1036-6559 | 10:36:20.0 | -65:59:09.2 | 0.53 | 1.36e-15 | 16.0  | 12.16 | 4.91e+12 |
| 242 | J1038+0032 | 10:38:26.9 | +00:32:43.6 | 0.03 | 6.7e-20  | 5.6   | 8.56  | 9.45e+9  |
| 243 | B1036-58   | 10:38:19.7 | -58:31:27.1 | 0.66 | 1.25e-15 | 21.0  | 10.30 | 5.15e+12 |
| 244 | B1039-19   | 10:41:36.1 | -19:42:13.6 | 1.39 | 9.45e-16 | 62.0  | 5.04  | 1.32e+13 |
| 245 | B1039-55   | 10:42:00.4 | -55:21:05.7 | 1.17 | 6.72e-15 | 38.0  | 7.55  | 2.16e+13 |
| 246 | J1043-6116 | 10:43:55.2 | -61:16:50.7 | 0.29 | 1.04e-14 | 12.0  | 11.94 | 8.47e+12 |
| 247 | J1045-4509 | 10:45:50.1 | -45:09:54.1 | 0.01 | 1.77e-20 | 1.45  | 17.01 | 1.26e+9  |
| 248 | J1046+0304 | 10:46:43.2 | +03:04:06.9 | 0.33 | 1.24e-16 | 14.0  | 10.87 | 1.79e+12 |
| 249 | B1044-57   | 10:46:18.8 | -58:13:52.0 | 0.37 | 1.15e-15 | 14.0  | 11.57 | 3.29e+12 |
| 250 | J1047-3032 | 10:47:00.8 | -30:32:18.0 | 0.33 | 6.1e-17  | 43.0  | 3.63  | 2.27e+12 |
| 251 | J1047-6709 | 10:47:28.2 | -67:09:51.0 | 0.20 | 1.69e-15 | 11.0  | 10.81 | 3.12e+12 |
| 252 | B1046-58   | 10:48:13.0 | -58:32:06.2 | 0.12 | 9.61e-14 | 13.0  | 7.30  | 2.75e+13 |
| 253 | J1048-5838 | 10:48:12.5 | -58:38:19.0 | 1.23 | 1.22e-14 | 409.0 | 0.87  | 2.6e+14  |
| 254 | J1054-5943 | 10:54:57.7 | -59:43:14.1 | 0.35 | 4.07e-15 | 6.1   | 26.43 | 2.7e+12  |
| 255 | J1054-5946 | 10:54:30.4 | -59:46:31.0 | 0.23 | 2.09e-16 | 29.0  | 4.47  | 2.83e+12 |
| 256 | J1054-6452 | 10:54:08.8 | -64:52:37.5 | 1.84 | 3.14e-15 | 34.0  | 10.60 | 1.32e+13 |
| 257 | J1055-6028 | 10:55:39.1 | -60:28:37.5 | 0.10 | 2.95e-14 | 9.0   | 9.43  | 1.59e+13 |
| 258 | J1055-6236 | 10:55:54.6 | -62:36:48.3 | 0.45 | 7.08e-16 | 14.0  | 12.76 | 2.58e+12 |
| 259 | B1054-62   | 10:56:25.5 | -62:58:47.6 | 0.42 | 3.58e-15 | 36.0  | 4.83  | 1.48e+13 |
| 260 | B1055-52   | 10:57:59.0 | -52:26:56.3 | 0.20 | 5.84e-15 | 18.0  | 6.62  | 9.42e+12 |
| 261 | B1056-78   | 10:57:27.7 | -79:14:23.6 | 1.35 | 1.33e-15 | 42.0  | 7.33  | 1.62e+13 |
| 262 | J1058-5957 | 10:58:34.2 | -59:57:36.4 | 0.62 | 6.57e-16 | 21.0  | 9.94  | 3.73e+12 |
| 263 | B1056-57   | 10:59:00.8 | -57:42:14.5 | 1.19 | 4.31e-15 | 31.0  | 9.32  | 1.41e+13 |
| 264 | J1101-6424 | 11:01:37.1 | -64:24:39.3 | 0.01 | 1.8e-21  | 1.39  | 15.57 | 3.61e+8  |
| 265 | J1103-6025 | 11:03:31.4 | -60:25:36.3 | 0.40 | 9.9e-16  | 8.9   | 19.05 | 1.94e+12 |
| 266 | J1104-6103 | 11:04:17.2 | -61:03:03.8 | 0.28 | 1.97e-15 | 14.0  | 10.09 | 4.3e+12  |
| 267 | J1105-4353 | 11:05:24.8 | -43:53:05   | 0.35 | 2.5e-15  | 23.92 | 6.60  | 8.24e+12 |
| 268 | J1105-6107 | 11:05:26.1 | -61:07:48.9 | 0.06 | 1.58e-14 | 4.1   | 16.53 | 3.55e+12 |
| 269 | J1107-5907 | 11:07:34.4 | -59:07:18.7 | 0.25 | 9.01e-18 | 170.0 | 1.93  | 1.44e+12 |
| 270 | B1105-59   | 11:07:58.7 | -59:47:04   | 1.52 | 3.4e-16  | 80.0  | 4.09  | 1.2e+13  |
| 271 | J1107-6143 | 11:07:12.3 | -61:43:59   | 1.80 | 1.56e-13 | 50.0  | 7.11  | 1.37e+14 |
| 272 | B1107-56   | 11:10:00.3 | -56:37:32.5 | 0.56 | 2.06e-15 | 28.0  | 7.09  | 8.79e+12 |
| 273 | B1110-65   | 11:12:38.4 | -66:13:04.6 | 0.33 | 8.25e-16 | 21.0  | 7.34  | 4.16e+12 |
| 274 | B1110-69   | 11:12:50.7 | -69:26:32.3 | 0.82 | 2.82e-15 | 35.0  | 6.87  | 1.29e+13 |
| 275 | B1112-60   | 11:14:22.6 | -61:00:32.1 | 0.88 | 4.6e-14  | 67.0  | 3.74  | 9.88e+13 |
| 276 | B1112+50   | 11:15:38.4 | +50:30:12.2 | 1.66 | 2.49e-15 | 35.0  | 9.76  | 1.21e+13 |
| 277 | J1115-6052 | 11:15:53.7 | -60:52:18.6 | 0.26 | 7.23e-15 | 10.0  | 13.62 | 5.89e+12 |
| 278 | J1116-2444 | 11:16:23.2 | -24:44:56.1 | 0.87 | 9.85e-16 | 34.0  | 7.27  | 7.39e+12 |
| 279 | B1114-41   | 11:16:43.0 | -41:22:43.9 | 0.94 | 7.95e-15 | 20.0  | 12.94 | 1.24e+13 |
| 280 | J1117-6154 | 11:17:23.8 | -61:54:22   | 0.51 | 1.25e-14 | 26.0  | 7.27  | 2.98e+13 |
| 281 | J1119-6127 | 11:19:14.3 | -61:27:49.5 | 0.41 | 4.02e-12 | 56.0  | 3.11  | 7.56e+14 |
| 282 | B1119-54   | 11:21:19.0 | -54:44:05.1 | 0.54 | 2.78e-15 | 26.0  | 7.48  | 9.48e+12 |
| 283 | J1123-4844 | 11:23:15.6 | -48:44:22.7 | 0.24 | 6.54e-17 | 13.0  | 10.15 | 7.27e+11 |
| 284 | J1123-6102 | 11:23:41.7 | -61:02:06.2 | 0.64 | 6.46e-15 | 24.0  | 8.86  | 1.34e+13 |
| 285 | J1123-6259 | 11:23:55.5 | -62:59:10.9 | 0.27 | 5.25e-15 | 14.0  | 9.92  | 7.13e+12 |
| 286 | J1123-6651 | 11:23:52.2 | -66:51:49.0 | 0.23 | 2.75e-15 | 23.0  | 5.64  | 8.24e+12 |
| 287 | J1125-5825 | 11:25:44.3 | -58:25:16.8 | 0.00 | 6.09e-20 | 1.72  | 15.29 | 1.67e+9  |
| 288 | J1125-6014 | 11:25:55.2 | -60:14:06.6 | 0.00 | 3.73e-21 | 1.8   | 19.71 | 2.97e+8  |
| 289 | J1125+7819 | 11:25:59.8 | +78:19:48.7 | 0.00 | 6.94e-21 | 0.97  | 19.68 | 5.13e+8  |
| 290 | B1124-60   | 11:26:52.6 | -60:54:39.9 | 0.20 | 2.81e-16 | 9.3   | 12.94 | 1.79e+12 |
| 291 | J1126-6942 | 11:26:21.6 | -69:42:15.8 | 0.58 | 3.29e-15 | 25.0  | 8.09  | 9.93e+12 |
| 292 | J1130-5826 | 11:30:16.3 | -58:26:02.3 | 0.16 | 1.59e-17 | 7.2   | 14.99 | 1.99e+11 |
| 293 | J1130-6807 | 11:30:31.9 | -68:07:28.5 | 0.26 | 4.6e-16  | 64.0  | 2.32  | 8.58e+12 |
| 294 | J1132-4700 | 11:32:14.5 | -47:00:36.5 | 0.33 | 7.77e-16 | 28.0  | 5.46  | 5.35e+12 |
| 295 | J1132-5627 | 11:32:15.7 | -56:27:28.9 | 0.18 | 6.8e-17  | 6.3   | 17.87 | 3.6e+11  |
| 296 | B1131-62   | 11:33:51.4 | -62:50:50.6 | 1.02 | 4.52e-16 | 349.0 | 0.93  | 4.22e+13 |
| 297 | B1133+16   | 11:36:03.1 | +15:51:14.1 | 1.19 | 3.73e-15 | 34.0  | 8.51  | 1.44e+13 |
| 298 | B1133-55   | 11:36:02.1 | -55:25:06.9 | 0.36 | 8.23e-15 | 26.0  | 6.20  | 1.62e+13 |
| 299 | J1136-6527 | 11:36:25.2 | -65:27:19.5 | 1.19 | 1.75e-15 | 35.8  | 8.08  | 1.38e+13 |
| 300 | J1137-6700 | 11:37:32.0 | -67:00:33.0 | 0.56 | 7.17e-17 | 118.0 | 1.80  | 6.44e+12 |
| 301 | J1141-3107 | 11:41:25.6 | -31:07:52.6 | 0.54 | 1.96e-15 | 26.0  | 7.50  | 7.96e+12 |
| 302 | J1141-3322 | 11:41:42.7 | -33:22:37.3 | 0.29 | 4.65e-16 | 22.0  | 6.55  | 3.26e+12 |
| 303 | J1141-6545 | 11:41:07.0 | -65:45:19.1 | 0.39 | 4.31e-15 | 15.0  | 11.14 | 6.82e+12 |
| 304 | J1142-6230 | 11:42:52.5 | -62:30:03.9 | 0.56 | 7.79e-17 | 37.0  | 5.38  | 2.25e+12 |

|     |            |            |             |      |          |       |       |          |
|-----|------------|------------|-------------|------|----------|-------|-------|----------|
| 305 | J1143-5158 | 11:43:15.0 | -51:58:39.8 | 0.68 | 6.95e-16 | 18.0  | 12.16 | 3.29e+12 |
| 306 | J1143-5536 | 11:43:09.7 | -55:36:04.5 | 0.69 | 4.85e-16 | 21.0  | 10.48 | 3.21e+12 |
| 307 | J1144-6217 | 11:44:02.1 | -62:17:30.3 | 0.85 | 3.08e-14 | 31.0  | 7.90  | 3.77e+13 |
| 308 | B1143-60   | 11:46:07.7 | -60:30:59.6 | 0.27 | 1.79e-15 | 14.0  | 9.95  | 4.95e+12 |
| 309 | J1151-6108 | 11:51:56.8 | -61:08:17.6 | 0.10 | 1.03e-14 | 13.55 | 6.41  | 9.27e+12 |
| 310 | J1152-6012 | 11:52:53.8 | -60:12:21   | 0.38 | 6.69e-15 | 19.0  | 8.60  | 1.75e+13 |
| 311 | J1156-5707 | 11:56:07.4 | -57:07:02.1 | 0.29 | 2.65e-14 | 17.0  | 8.42  | 1.91e+13 |
| 312 | J1156-5909 | 11:56:21.5 | -59:09:12.3 | 1.04 | 1.02e-15 | 20.0  | 13.58 | 4.43e+12 |
| 313 | J1157-5112 | 11:57:08.1 | -51:12:56.1 | 0.04 | 1.43e-19 | 4.0   | 14.12 | 1.36e+10 |
| 314 | B1154-62   | 11:57:15.2 | -62:24:50.9 | 0.40 | 3.93e-15 | 38.0  | 4.47  | 1.63e+13 |
| 315 | J1159-6409 | 11:59:21.7 | -64:09:57   | 0.67 | 2.4e-17  | 245.0 | 1.11  | 6.61e+12 |
| 316 | J1159-7910 | 11:59:35.7 | -79:10:05.6 | 0.53 | 2.82e-15 | 20.0  | 9.63  | 7.36e+12 |
| 317 | B1159-58   | 12:02:28.3 | -58:20:33.6 | 0.45 | 2.13e-15 | 15.0  | 11.95 | 4.8e+12  |
| 318 | J1204-6843 | 12:04:36.7 | -68:43:17.1 | 0.31 | 2.17e-16 | 12.0  | 12.35 | 1.22e+12 |
| 319 | J1210-5559 | 12:10:05.9 | -55:59:03.8 | 0.28 | 7.25e-16 | 6.8   | 21.03 | 1.27e+12 |
| 320 | J1210-6322 | 12:10:46.7 | -63:22:20.9 | 1.16 | 9.25e-15 | 116.0 | 2.50  | 7.62e+13 |
| 321 | J1211-6324 | 12:11:24.1 | -63:24:45.2 | 0.43 | 2.57e-16 | 22.0  | 7.96  | 2.44e+12 |
| 322 | J1214-5830 | 12:14:08.4 | -58:30:25.9 | 0.91 | 5.34e-17 | 17.0  | 14.99 | 8.62e+11 |
| 323 | J1215-5328 | 12:15:00.6 | -53:28:31.6 | 0.64 | 1.15e-16 | 52.0  | 4.10  | 3.83e+12 |
| 324 | J1216-6410 | 12:16:07.3 | -64:10:09.2 | 0.00 | 1.62e-21 | 3.0   | 31.91 | 1.45e+8  |
| 325 | J1220-6318 | 12:20:17.8 | -63:18:46.5 | 0.79 | 8.03e-17 | 77.0  | 3.10  | 4.72e+12 |
| 326 | J1221-0633 | 12:21:24.8 | -6:33:51    | 0.00 | 1.09e-20 | 0.28  | 48.48 | 1.96e+8  |
| 327 | J1222-5738 | 12:22:52.3 | -57:38:20   | 1.08 | 1.5e-16  | 17.0  | 16.38 | 1.45e+12 |
| 328 | J1223-5856 | 12:23:40.1 | -58:56:48.9 | 0.29 | 5.7e-18  | 85.5  | 1.93  | 1.22e+12 |
| 329 | J1224-6208 | 12:24:44.2 | -62:08:41.1 | 0.59 | 2.02e-14 | 21.0  | 9.69  | 2.68e+13 |
| 330 | B1221-63   | 12:24:22.2 | -64:07:53.8 | 0.22 | 4.95e-15 | 8.2   | 15.19 | 4.0e+12  |
| 331 | J1225-5556 | 12:25:43.8 | -55:56:43.1 | 1.02 | 2.06e-15 | 31.0  | 8.64  | 9.76e+12 |
| 332 | J1225-6035 | 12:25:28.6 | -60:35:37.6 | 0.63 | 2.88e-16 | 8.0   | 27.13 | 9.43e+11 |
| 333 | B1222-63   | 12:25:42.8 | -64:08:43   | 0.42 | 9.46e-16 | 21.0  | 8.21  | 4.47e+12 |
| 334 | J1231-1411 | 12:31:11.3 | -14:11:43.6 | 0.00 | 2.28e-20 | 0.77  | 23.00 | 7.51e+8  |
| 335 | J1231-4609 | 12:31:45.7 | -46:09:45.2 | 0.88 | 3.8e-17  | 53.0  | 4.70  | 2.26e+12 |
| 336 | J1232-4742 | 12:32:19.1 | -47:42:50.9 | 1.87 | 1.4e-17  | 344.0 | 1.11  | 8.45e+12 |
| 337 | J1232-6501 | 12:32:17.8 | -65:01:03.3 | 0.09 | 8.11e-19 | 14.0  | 5.85  | 8.4e+10  |
| 338 | J1234-3630 | 12:34:12.0 | -36:30:41.1 | 0.57 | 8.66e-16 | 21.0  | 9.55  | 4.28e+12 |
| 339 | J1236-5033 | 12:36:59.1 | -50:33:36.3 | 0.29 | 1.56e-16 | 16.0  | 9.04  | 1.38e+12 |
| 340 | B1237+25   | 12:39:40.4 | +24:53:49.2 | 1.38 | 9.6e-16  | 53.0  | 5.88  | 1.14e+13 |
| 341 | B1236-68   | 12:39:58.9 | -68:32:28.9 | 1.30 | 1.19e-14 | 38.0  | 7.96  | 2.87e+13 |
| 342 | B1237-41   | 12:40:17.6 | -41:24:51.7 | 0.51 | 1.74e-15 | 9.5   | 20.33 | 2.75e+12 |
| 343 | J1243-5735 | 12:43:35.3 | -57:35:42.8 | 0.47 | 8e-17    | 74.0  | 2.55  | 4.41e+12 |
| 344 | B1240-64   | 12:43:17.1 | -64:23:23.7 | 0.39 | 4.49e-15 | 8.0   | 21.06 | 3.72e+12 |
| 345 | J1244-6359 | 12:44:47.6 | -63:59:47.4 | 0.15 | 4.4e-18  | 22.9  | 4.61  | 3.2e+11  |
| 346 | J1246+2253 | 12:46:49.3 | +22:53:43.2 | 0.47 | 8.89e-17 | 16.0  | 11.46 | 1.46e+12 |
| 347 | J1248-6444 | 12:48:32.8 | -64:44:00.0 | 1.23 | 1.93e-15 | 62.0  | 4.76  | 1.88e+13 |
| 348 | J1251-7407 | 12:51:52.9 | -74:07:15.0 | 0.33 | 3.65e-16 | 9.9   | 15.46 | 1.31e+12 |
| 349 | J1252-6314 | 12:52:42.6 | -63:14:32.7 | 0.82 | 1.08e-16 | 40.0  | 6.02  | 2.88e+12 |
| 350 | J1253-5820 | 12:53:28.3 | -58:20:40.8 | 0.26 | 2.1e-15  | 12.0  | 11.23 | 3.8e+12  |
| 351 | J1255-6131 | 12:55:54.8 | -61:31:10.1 | 0.66 | 4e-15    | 19.0  | 11.36 | 8.33e+12 |
| 352 | B1254-10   | 12:57:04.7 | -10:27:05.5 | 0.62 | 3.63e-16 | 32.0  | 6.53  | 4.21e+12 |
| 353 | B1256-67   | 12:59:22.6 | -67:41:40.2 | 0.66 | 8.55e-16 | 26.0  | 8.32  | 5.27e+12 |
| 354 | B1257+12   | 13:00:03.5 | +12:40:56.4 | 0.01 | 1.14e-19 | 1.2   | 18.80 | 2.64e+9  |
| 355 | J1300-6602 | 13:00:26.9 | -66:02:16.8 | 1.14 | 3.35e-16 | 96.3  | 2.97  | 1.21e+13 |
| 356 | B1259-63   | 13:02:47.6 | -63:50:08.6 | 0.05 | 2.28e-15 | 30.1  | 4.14  | 4.63e+12 |
| 357 | J1305-6203 | 13:05:21.1 | -62:03:21.0 | 0.43 | 3.22e-14 | 31.0  | 5.63  | 3.83e+13 |
| 358 | B1302-64   | 13:05:23.4 | -64:55:28.5 | 0.57 | 4.03e-15 | 49.0  | 4.13  | 2.13e+13 |
| 359 | B1303-66   | 13:06:38.1 | -66:17:21.2 | 0.47 | 5.98e-15 | 58.0  | 3.21  | 3.38e+13 |
| 360 | J1308-4650 | 13:08:44.5 | -46:50:29.7 | 1.06 | 5.26e-16 | 62.0  | 4.41  | 9.82e+12 |
| 361 | J1308-5844 | 13:08:21.0 | -58:44:13.8 | 0.46 | 8.64e-15 | 13.0  | 14.00 | 8.38e+12 |
| 362 | B1309-12   | 13:11:52.6 | -12:28:01.6 | 0.45 | 1.51e-16 | 11.0  | 16.29 | 9.38e+11 |
| 363 | B1309-53   | 13:12:04.7 | -54:02:42.5 | 0.73 | 1.47e-16 | 40.0  | 5.67  | 3.35e+12 |
| 364 | B1309-55   | 13:12:53.5 | -55:16:47.3 | 0.85 | 5.7e-15  | 35.0  | 6.99  | 1.83e+13 |
| 365 | J1316-6232 | 13:16:46.3 | -62:32:12.2 | 0.34 | 5.3e-15  | 180.0 | 1.42  | 5.5e+13  |
| 366 | J1317-6302 | 13:17:44.6 | -63:02:52.2 | 0.26 | 1.02e-16 | 25.0  | 5.49  | 1.73e+12 |
| 367 | B1316-60   | 13:19:20.2 | -60:56:46.7 | 0.28 | 1.53e-15 | 12.0  | 11.85 | 3.25e+12 |
| 368 | J1319-6105 | 13:19:26.3 | -61:05:26.2 | 0.42 | 1.5e-15  | 27.0  | 6.40  | 7.21e+12 |
| 369 | J1320-3512 | 13:20:12.6 | -35:12:26.0 | 0.46 | 1.9e-18  | 30.0  | 6.01  | 2.85e+11 |

|     |            |            |             |      |          |       |       |          |
|-----|------------|------------|-------------|------|----------|-------|-------|----------|
| 370 | B1317-53   | 13:20:53.9 | -53:59:05.0 | 0.28 | 9.25e-15 | 15.0  | 9.40  | 9.97e+12 |
| 371 | J1321-5922 | 13:21:39.5 | -59:22:52.1 | 1.28 | 2.37e-15 | 21.0  | 14.38 | 7.96e+12 |
| 372 | B1322+83   | 13:21:45.6 | +83:23:39.4 | 0.67 | 5.66e-16 | 38.1  | 5.71  | 6.26e+12 |
| 373 | J1322-6241 | 13:22:32.1 | -62:41:53.5 | 0.51 | 2.59e-15 | 13.0  | 14.62 | 4.59e+12 |
| 374 | B1323-58   | 13:26:58.2 | -58:59:29.2 | 0.48 | 3.24e-15 | 23.0  | 7.99  | 9.57e+12 |
| 375 | B1323-63   | 13:26:32.4 | -64:08:43.8 | 0.79 | 3.09e-15 | 43.0  | 5.50  | 1.65e+13 |
| 376 | B1322-66   | 13:26:02.7 | -67:00:49.2 | 0.54 | 5.33e-15 | 55.0  | 3.60  | 2.74e+13 |
| 377 | J1327-0755 | 13:27:57.5 | -07:55:29.8 | 0.00 | 1.77e-21 | 0.27  | 63.92 | 7.76e+7  |
| 378 | B1323-62   | 13:27:17.1 | -62:22:45.4 | 0.53 | 1.88e-14 | 18.0  | 10.76 | 1.71e+13 |
| 379 | B1323-627  | 13:27:07.4 | -63:01:15.5 | 0.20 | 1.53e-15 | 19.0  | 6.27  | 5.82e+12 |
| 380 | J1327-6400 | 13:27:10.2 | -64:00:13.1 | 0.28 | 3.12e-14 | 120.0 | 1.61  | 1.68e+14 |
| 381 | B1325-43   | 13:28:06.4 | -43:57:44.1 | 0.53 | 3.01e-15 | 18.0  | 10.79 | 6.84e+12 |
| 382 | B1325-49   | 13:28:33.5 | -49:21:33.4 | 1.48 | 6.1e-16  | 66.0  | 4.89  | 1.13e+13 |
| 383 | J1331-5245 | 13:31:00.0 | -52:45:25.4 | 0.65 | 5.1e-16  | 43.0  | 4.99  | 6.69e+12 |
| 384 | J1332-3032 | 13:32:52.4 | -30:32:17.3 | 0.65 | 5.6e-16  | 110.0 | 2.03  | 1.72e+13 |
| 385 | J1333-4449 | 13:33:44.8 | -44:49:26.2 | 0.35 | 5.4e-19  | 8.8   | 17.95 | 4.49e+10 |
| 386 | J1334-5839 | 13:34:30.1 | -58:39:16.5 | 0.11 | 2.16e-17 | 6.5   | 13.54 | 2.85e+11 |
| 387 | J1336-2522 | 13:36:20.8 | -25:22:01.6 | 0.48 | 3.31e-16 | 24.0  | 7.66  | 3.19e+12 |
| 388 | J1337-6423 | 13:37:31.8 | -64:23:04.9 | 0.01 | 2.47e-20 | 1.36  | 19.91 | 1.43e+9  |
| 389 | B1334-61   | 13:38:09.2 | -62:04:18.7 | 1.24 | 1.38e-14 | 196.0 | 1.56  | 1.53e+14 |
| 390 | J1339-4712 | 13:39:56.5 | -47:12:05.5 | 0.14 | 5.3e-19  | 4.7   | 21.33 | 2.37e+10 |
| 391 | J1339-6618 | 13:39:56.6 | -66:18:07.8 | 0.56 | 3.5e-16  | 35.0  | 5.68  | 4.52e+12 |
| 392 | B1336-64   | 13:40:00.3 | -64:56:42.9 | 0.38 | 5.05e-15 | 20.0  | 8.19  | 9.82e+12 |
| 393 | J1341-6023 | 13:41:07.3 | -60:23:34.7 | 0.63 | 1.95e-14 | 18.0  | 11.71 | 1.74e+13 |
| 394 | B1338-62   | 13:41:42.6 | -62:20:20.7 | 0.19 | 2.53e-13 | 28.0  | 4.30  | 9.45e+13 |
| 395 | J1344-5855 | 13:44:53.0 | -58:55:24.7 | 0.25 | 2.91e-15 | 23.8  | 5.66  | 8.79e+12 |
| 396 | J1345-6115 | 13:45:44.4 | -61:15:30.6 | 1.25 | 3.25e-15 | 33.0  | 9.00  | 1.3e+13  |
| 397 | J1346-4918 | 13:46:22.3 | -49:18:07.2 | 0.30 | 3.5e-17  | 18.0  | 8.10  | 7.35e+11 |
| 398 | J1347-5947 | 13:47:19.3 | -59:47:39.8 | 0.61 | 1.42e-14 | 20.0  | 10.39 | 1.65e+13 |
| 399 | J1349-6130 | 13:49:36.6 | -61:30:17.1 | 0.26 | 5.12e-15 | 15.0  | 9.05  | 7.41e+12 |
| 400 | J1350-5115 | 13:50:16.1 | -51:15:24.5 | 0.30 | 7.58e-16 | 7.5   | 19.54 | 1.43e+12 |
| 401 | J1352-6803 | 13:52:34.4 | -68:03:37.1 | 0.63 | 1.23e-15 | 41.0  | 5.15  | 9.92e+12 |
| 402 | B1352-51   | 13:55:58.6 | -51:53:53.9 | 0.64 | 2.81e-15 | 13.0  | 16.54 | 4.78e+12 |
| 403 | J1355-5925 | 13:55:59.1 | -59:25:00.9 | 1.21 | 5.99e-15 | 45.0  | 6.49  | 2.41e+13 |
| 404 | J1356-5521 | 13:56:50.5 | -55:21:12.9 | 0.51 | 7.24e-16 | 31.0  | 6.12  | 5.76e+12 |
| 405 | J1357-6429 | 13:57:02.4 | -64:29:30.2 | 0.17 | 3.6e-13  | 31.0  | 3.68  | 1.22e+14 |
| 406 | B1356-60   | 13:59:58.2 | -60:38:07.5 | 0.13 | 6.33e-15 | 5.4   | 17.80 | 2.97e+12 |
| 407 | J1400-1431 | 14:00:37.0 | -14:31:47.0 | 0.00 | 7.23e-21 | 0.48  | 33.71 | 2.72e+8  |
| 408 | B1358-63   | 14:01:52.4 | -63:57:42.0 | 0.84 | 1.68e-14 | 17.0  | 14.42 | 1.53e+13 |
| 409 | B1359-51   | 14:02:56.0 | -50:21:43   | 1.38 | 5.41e-15 | 62.0  | 5.03  | 3.16e+13 |
| 410 | J1403-6310 | 14:03:14.0 | -63:10:27   | 0.40 | 9e-17    | 34.0  | 4.97  | 2.21e+12 |
| 411 | J1403-7646 | 14:03:04.1 | -76:46:57.5 | 1.31 | 1.2e-15  | 69.0  | 4.40  | 1.65e+13 |
| 412 | J1405-5641 | 14:05:12.4 | -56:41:24.2 | 0.62 | 1.2e-15  | 22.0  | 9.49  | 5.28e+12 |
| 413 | J1409-6953 | 14:09:16.9 | -69:53:34.4 | 0.53 | 8.4e-16  | 31.0  | 6.24  | 6.2e+12  |
| 414 | J1410-7404 | 14:10:07.3 | -74:04:53.3 | 0.28 | 6.74e-18 | 3.3   | 47.51 | 5.95e+10 |
| 415 | J1411+2551 | 14:11:18.8 | +25:51:08.3 | 0.06 | 9.56e-20 | 4.45  | 15.13 | 9.47e+9  |
| 416 | J1412-6111 | 14:12:59.6 | -61:11:30.5 | 0.53 | 1.91e-15 | 21.0  | 9.21  | 6.36e+12 |
| 417 | J1412-6145 | 14:12:07.6 | -61:45:28.4 | 0.32 | 9.9e-14  | 32.0  | 4.72  | 6.87e+13 |
| 418 | J1413-6141 | 14:13:09.8 | -61:41:13   | 0.29 | 3.33e-13 | 57.0  | 2.65  | 2.14e+14 |
| 419 | J1413-6222 | 14:13:05.4 | -62:22:27.8 | 0.29 | 2.23e-15 | 55.0  | 2.75  | 1.7e+13  |
| 420 | B1409-62   | 14:13:31.3 | -63:07:35.4 | 0.39 | 7.43e-15 | 8.5   | 19.94 | 5.84e+12 |
| 421 | J1415-6621 | 14:15:31.2 | -66:21:12.2 | 0.39 | 5.8e-16  | 14.0  | 11.93 | 2.34e+12 |
| 422 | J1416-5033 | 14:16:44.6 | -50:33:17   | 0.79 | 1.2e-16  | 25.0  | 9.47  | 1.9e+12  |
| 423 | J1416-6037 | 14:16:30.5 | -60:37:59.5 | 0.30 | 4.28e-15 | 19.0  | 7.63  | 8.57e+12 |
| 424 | J1418-3921 | 14:18:50.2 | -39:21:18.5 | 1.10 | 8.89e-16 | 53.0  | 5.24  | 1.93e+13 |
| 425 | B1417-54   | 14:20:29.1 | -54:16:22.7 | 0.94 | 2.32e-16 | 30.0  | 8.56  | 3.17e+12 |
| 426 | J1420-5625 | 14:20:03.0 | -56:25:55.0 | 0.03 | 6.75e-20 | 12.0  | 5.03  | 1.75e+10 |
| 427 | J1420-6048 | 14:20:08.2 | -60:48:16.4 | 0.07 | 8.32e-14 | 15.0  | 4.99  | 2.77e+13 |
| 428 | J1421-4409 | 14:21:20.9 | -44:09:04.5 | 0.01 | 1.24e-20 | 2.72  | 10.73 | 1.53e+9  |
| 429 | J1423-6953 | 14:23:26.7 | -69:53:42.8 | 0.33 | 1.45e-15 | 23.0  | 6.70  | 6.34e+12 |
| 430 | J1424-5556 | 14:24:12.7 | -55:56:13.9 | 0.77 | 7.8e-16  | 34.0  | 6.85  | 6.57e+12 |
| 431 | J1424-5822 | 14:24:32.1 | -58:22:55.7 | 0.37 | 3.94e-15 | 21.0  | 7.68  | 9.1e+12  |
| 432 | J1424-6438 | 14:24:59.2 | -64:38:10.0 | 1.02 | 2.4e-16  | 89.0  | 3.04  | 9.46e+12 |
| 433 | J1425-5723 | 14:25:36.5 | -57:23:30.8 | 0.35 | 2.2e-17  | 12.0  | 13.22 | 3.9e+11  |
| 434 | J1425-6210 | 14:25:07.7 | -62:10:04.9 | 0.50 | 4.78e-16 | 16.0  | 11.79 | 2.42e+12 |

|     |            |            |             |      |          |       |       |          |
|-----|------------|------------|-------------|------|----------|-------|-------|----------|
| 435 | J1427-4158 | 14:27:50.7 | -41:58:56.3 | 0.59 | 6.21e-16 | 23.0  | 8.85  | 3.97e+12 |
| 436 | B1424-55   | 14:28:26.2 | -55:30:50.0 | 0.57 | 2.09e-15 | 22.0  | 9.12  | 6.97e+12 |
| 437 | J1430-5712 | 14:30:16.1 | -57:12:31.4 | 0.49 | 4.69e-14 | 39.8  | 4.71  | 5.92e+13 |
| 438 | B1426-66   | 14:30:40.7 | -66:23:05.5 | 0.79 | 2.78e-15 | 24.0  | 9.81  | 8.77e+12 |
| 439 | J1431-5740 | 14:31:03.4 | -57:40:11.6 | 0.00 | 6.42e-21 | 0.48  | 38.83 | 2.62e+8  |
| 440 | J1434-5943 | 14:34:58.3 | -59:43:41.6 | 1.07 | 2.96e-17 | 55.6  | 4.94  | 2.91e+12 |
| 441 | J1434+7257 | 14:33:59.7 | +72:57:26.5 | 0.04 | 5.5e-19  | 3.5   | 15.79 | 1.78e+10 |
| 442 | J1435-5954 | 14:35:00.2 | -59:54:49.5 | 0.47 | 1.55e-15 | 34.0  | 5.39  | 9.22e+12 |
| 443 | J1437-5959 | 14:37:01.9 | -59:59:01.4 | 0.06 | 8.59e-15 | 11.13 | 6.23  | 6.79e+12 |
| 444 | J1439-5501 | 14:39:39.7 | -55:01:23.6 | 0.03 | 1.42e-19 | 3.4   | 13.58 | 8.69e+9  |
| 445 | B1436-63   | 14:40:31.2 | -63:44:48.4 | 0.46 | 1.12e-15 | 21.0  | 8.59  | 4.86e+12 |
| 446 | J1443-5122 | 14:43:26.9 | -51:22:26   | 0.73 | 3.38e-16 | 85.0  | 2.72  | 1.61e+13 |
| 447 | J1446-4701 | 14:46:35.7 | -47:01:26.7 | 0.00 | 9.81e-21 | 0.29  | 50.02 | 1.94e+8  |
| 448 | J1449-5846 | 14:49:25.4 | -58:46:40.4 | 0.46 | 8.6e-17  | 27.0  | 6.71  | 1.73e+12 |
| 449 | J1452-6036 | 14:52:51.8 | -60:36:31.4 | 0.15 | 1.45e-15 | 16.0  | 6.63  | 4.16e+12 |
| 450 | J1453+1902 | 14:53:45.7 | +19:02:12.1 | 0.01 | 1.17e-20 | 1.1   | 19.79 | 7.78e+8  |
| 451 | B1449-64   | 14:53:32.6 | -64:13:16.0 | 0.18 | 2.74e-15 | 7.9   | 14.35 | 2.86e+12 |
| 452 | J1454-5846 | 14:54:10.9 | -58:46:34.7 | 0.05 | 8.17e-19 | 4.8   | 12.01 | 2.96e+10 |
| 453 | J1455-3330 | 14:55:47.9 | -33:30:46.3 | 0.01 | 2.43e-20 | 2.3   | 11.89 | 2.16e+9  |
| 454 | B1451-68   | 14:55:59.9 | -68:43:39.5 | 0.26 | 9.89e-17 | 26.0  | 5.30  | 1.77e+12 |
| 455 | B1454-51   | 14:57:40.0 | -51:22:54.9 | 1.75 | 5.3e-15  | 85.0  | 4.13  | 4.28e+13 |
| 456 | J1457-5902 | 14:57:31.9 | -59:02:04   | 0.39 | 1.23e-14 | 14.0  | 11.90 | 1.76e+13 |
| 457 | J1501-0046 | 15:01:44.9 | -00:46:23.5 | 0.46 | 2.39e-16 | 16.0  | 11.34 | 1.71e+12 |
| 458 | J1502+4653 | 15:02:19.8 | +46:53:27.4 | 1.75 | 1.72e-16 | 41.06 | 8.55  | 3.74e+12 |
| 459 | J1502-5653 | 15:02:57.3 | -56:53:39.2 | 0.54 | 1.83e-15 | 14.0  | 13.95 | 4.15e+12 |
| 460 | J1502-6128 | 15:02:29.8 | -61:28:50.3 | 0.84 | 1.35e-15 | 58.0  | 4.21  | 1.47e+13 |
| 461 | J1502-6752 | 15:02:18.6 | -67:52:16.7 | 0.03 | 3.15e-19 | 17.0  | 5.58  | 3.21e+10 |
| 462 | J1504-5621 | 15:04:49.1 | -56:21:32   | 0.41 | 5.53e-15 | 21.0  | 8.14  | 1.8e+13  |
| 463 | J1504-5659 | 15:04:31.9 | -56:59:19.4 | 1.67 | 1.43e-15 | 60.3  | 5.68  | 1.58e+13 |
| 464 | B1503-51   | 15:06:39.5 | -51:58:10   | 0.84 | 6.37e-15 | 35.0  | 6.95  | 1.93e+13 |
| 465 | B1504-43   | 15:07:34.1 | -43:52:04.0 | 0.29 | 1.58e-15 | 8.4   | 17.11 | 2.32e+12 |
| 466 | J1507-5800 | 15:07:03.5 | -58:00:56.2 | 0.90 | 2.6e-16  | 64.5  | 3.91  | 7.16e+12 |
| 467 | B1503-66   | 15:07:48.6 | -66:40:57.8 | 0.36 | 1.15e-15 | 5.2   | 31.92 | 1.22e+12 |
| 468 | B1508+55   | 15:09:25.6 | +55:31:32.3 | 0.74 | 5e-15    | 26.3  | 8.69  | 1.29e+13 |
| 469 | B1507-44   | 15:10:48.9 | -44:22:07   | 0.94 | 6.1e-16  | 100.0 | 2.61  | 1.68e+13 |
| 470 | J1511-5414 | 15:11:51.2 | -54:14:40.3 | 0.20 | 4.85e-16 | 7.0   | 17.17 | 1.68e+12 |
| 471 | J1511-5835 | 15:11:07.0 | -58:35:28   | 0.30 | 3.44e-16 | 46.0  | 3.28  | 5.7e+12  |
| 472 | B1508-57   | 15:12:43.0 | -57:59:59.8 | 0.13 | 6.85e-15 | 15.0  | 6.47  | 8.43e+12 |
| 473 | J1513-5739 | 15:13:58.9 | -57:39:01.4 | 0.97 | 2.75e-14 | 30.0  | 8.73  | 3.45e+13 |
| 474 | B1509-58   | 15:13:55.8 | -59:08:09.6 | 0.15 | 1.53e-12 | 37.0  | 3.07  | 2.88e+14 |
| 475 | J1513-6013 | 15:13:54.0 | -60:13:26.5 | 1.96 | 1.37e-15 | 64.2  | 5.78  | 1.65e+13 |
| 476 | B1510-48   | 15:14:14.5 | -48:34:19.9 | 0.45 | 9.26e-16 | 12.0  | 15.03 | 2.53e+12 |
| 477 | J1514-5316 | 15:14:40.1 | -53:16:02.3 | 0.30 | 1.6e-18  | 16.1  | 9.01  | 1.41e+11 |
| 478 | J1517-4356 | 15:17:27.3 | -43:56:17.9 | 0.65 | 2.16e-16 | 22.0  | 9.75  | 2.24e+12 |
| 479 | J1517-4636 | 15:17:29.3 | -46:36:00.6 | 0.89 | 2.1e-15  | 26.0  | 9.62  | 8.26e+12 |
| 480 | J1518-0627 | 15:18:59.1 | -06:27:07.7 | 0.79 | 4.18e-16 | 46.0  | 5.15  | 6.49e+12 |
| 481 | J1518-3952 | 15:18:56.9 | -39:52:30.3 | 0.50 | 2.37e-16 | 55.0  | 3.46  | 5.76e+12 |
| 482 | J1518+4904 | 15:18:16.7 | +49:04:34.2 | 0.04 | 2.72e-20 | 2.36  | 23.41 | 2.69e+9  |
| 483 | J1519-5734 | 15:19:47.5 | -57:34:13.6 | 0.52 | 4.27e-15 | 82.0  | 2.42  | 3.57e+13 |
| 484 | J1519-6308 | 15:19:09.5 | -63:08:19.5 | 1.25 | 5.96e-15 | 39.0  | 7.62  | 2.87e+13 |
| 485 | J1522-5525 | 15:22:06.7 | -55:25:17.5 | 1.39 | 3.3e-15  | 30.0  | 10.44 | 1.2e+13  |
| 486 | B1518-58   | 15:22:42.2 | -58:29:02.8 | 0.40 | 2.06e-15 | 27.0  | 6.21  | 8.44e+12 |
| 487 | J1523-3235 | 15:23:37.7 | -32:35:42.1 | 1.50 | 9.53e-16 | 97.0  | 3.36  | 2.65e+13 |
| 488 | J1524-5625 | 15:24:49.8 | -56:25:23.4 | 0.08 | 3.9e-14  | 17.0  | 4.71  | 2.15e+13 |
| 489 | J1524-5706 | 15:24:21.4 | -57:06:34.6 | 1.12 | 3.56e-13 | 40.0  | 7.01  | 1.65e+14 |
| 490 | J1525-5417 | 15:25:28.3 | -54:17:20   | 1.01 | 1.62e-14 | 11.0  | 24.93 | 9.72e+12 |
| 491 | J1525-5523 | 15:25:36.0 | -55:23:27.2 | 0.36 | 8.96e-18 | 40.9  | 3.94  | 8.32e+11 |
| 492 | B1523-55   | 15:27:40.7 | -55:52:08.3 | 1.05 | 1.13e-14 | 39.0  | 6.97  | 2.87e+13 |
| 493 | J1528-3146 | 15:28:34.9 | -31:46:06.8 | 0.06 | 2.49e-19 | 1.29  | 61.84 | 4.47e+9  |
| 494 | J1528-4109 | 15:28:08.0 | -41:09:28.8 | 0.53 | 3.96e-16 | 14.0  | 13.84 | 1.93e+12 |
| 495 | J1529-3828 | 15:29:15.1 | -38:28:45.8 | 0.01 | 2.7e-20  | 1.1   | 23.38 | 1.22e+9  |
| 496 | J1530-5327 | 15:30:26.8 | -53:27:56.0 | 0.28 | 4.68e-15 | 16.0  | 8.80  | 7.56e+12 |
| 497 | J1530-6343 | 15:30:47.6 | -63:43:13.6 | 0.91 | 8.25e-16 | 30.0  | 8.44  | 5.97e+12 |
| 498 | J1531-4012 | 15:31:08.0 | -40:12:30.9 | 0.36 | 9.63e-17 | 12.0  | 13.29 | 8.16e+11 |
| 499 | J1531-5610 | 15:31:27.9 | -56:10:55.3 | 0.08 | 1.38e-14 | 8.3   | 9.42  | 6.66e+12 |



|     |            |            |             |      |          |       |       |          |
|-----|------------|------------|-------------|------|----------|-------|-------|----------|
| 500 | B1530+27   | 15:32:10.3 | +27:45:49.6 | 1.12 | 7.8e-16  | 35.7  | 7.88  | 6.91e+12 |
| 501 | J1534-4428 | 15:34:52.0 | -44:28:09.4 | 1.22 | 1.8e-16  | 178.0 | 1.70  | 1.6e+13  |
| 502 | B1530-53   | 15:34:08.2 | -53:34:19.6 | 1.37 | 1.43e-15 | 48.0  | 6.46  | 1.26e+13 |
| 503 | B1530-539  | 15:34:33.5 | -54:05:39.7 | 0.29 | 1.54e-15 | 20.0  | 7.18  | 5.41e+12 |
| 504 | J1535-4114 | 15:35:17.0 | -41:14:03.1 | 0.43 | 4.07e-15 | 22.0  | 7.96  | 9.7e+12  |
| 505 | J1535-4415 | 15:35:55.9 | -44:15:08.4 | 0.47 | 4.05e-17 | 130.0 | 1.58  | 5.44e+12 |
| 506 | J1535-5848 | 15:35:16.7 | -58:48:27.7 | 0.31 | 2.72e-15 | 10.0  | 14.82 | 3.62e+12 |
| 507 | J1536-3602 | 15:36:17.3 | -36:02:58.8 | 1.32 | 7.9e-16  | 97.0  | 3.16  | 1.88e+13 |
| 508 | J1536-5433 | 15:36:04.8 | -54:33:15   | 0.88 | 1.91e-15 | 66.0  | 3.79  | 1.98e+13 |
| 509 | B1534+12   | 15:37:09.9 | +11:55:55.4 | 0.04 | 2.42e-18 | 1.5   | 36.85 | 1.62e+10 |
| 510 | J1537-4912 | 15:37:28.2 | -49:12:03   | 0.30 | 1.93e-15 | 32.0  | 4.62  | 9.58e+12 |
| 511 | J1537-5153 | 15:37:15.7 | -51:53:06   | 1.53 | 4.17e-15 | 45.0  | 7.28  | 2.15e+13 |
| 512 | J1537-5312 | 15:37:37.6 | -53:12:25.0 | 0.01 | 1.59e-20 | 2.35  | 11.46 | 1.69e+9  |
| 513 | J1538-5621 | 15:38:43.2 | -56:21:55.5 | 1.91 | 7.31e-15 | 60.6  | 6.04  | 3.59e+13 |
| 514 | J1538-5732 | 15:38:18.1 | -57:32:29.3 | 0.34 | 4.55e-15 | 12.0  | 12.99 | 5.61e+12 |
| 515 | J1538-5750 | 15:38:08.4 | -57:50:17.1 | 0.51 | 4.2e-17  | 145.0 | 1.49  | 5.68e+12 |
| 516 | J1539-4828 | 15:39:40.8 | -48:28:57   | 1.27 | 1.27e-15 | 44.0  | 6.80  | 1.87e+13 |
| 517 | B1535-56   | 15:39:14.0 | -56:26:26.3 | 0.24 | 4.85e-15 | 19.0  | 6.94  | 9.97e+12 |
| 518 | J1539-6322 | 15:39:24.7 | -63:22:53.2 | 1.63 | 2.02e-16 | 83.0  | 4.08  | 8.16e+12 |
| 519 | J1540-5736 | 15:40:59.0 | -57:36:57   | 0.61 | 4.21e-16 | 27.0  | 7.70  | 3.83e+12 |
| 520 | J1542-5034 | 15:42:45.3 | -50:34:03.6 | 0.60 | 4.02e-15 | 11.0  | 18.93 | 4.84e+12 |
| 521 | J1542-5133 | 15:42:19.9 | -51:33:35   | 1.78 | 5.89e-16 | 59.0  | 6.00  | 9.93e+12 |
| 522 | J1542-5303 | 15:42:54.5 | -53:03:41   | 1.21 | 7.78e-14 | 71.0  | 4.11  | 1.37e+14 |
| 523 | B1540-06   | 15:43:30.1 | -06:20:45.3 | 0.71 | 8.8e-16  | 17.0  | 13.21 | 3.5e+12  |
| 524 | B1541+09   | 15:43:38.8 | +09:29:16.3 | 0.75 | 4.32e-16 | 264.0 | 1.07  | 3.77e+13 |
| 525 | J1543-5149 | 15:43:44.1 | -51:49:54.6 | 0.00 | 1.62e-20 | 1.14  | 18.90 | 5.7e+8   |
| 526 | J1543-5459 | 15:43:56.4 | -54:59:15.0 | 0.38 | 5.21e-14 | 52.0  | 3.22  | 7.99e+13 |
| 527 | J1544+4937 | 15:44:04.4 | +49:37:55.2 | 0.00 | 2.93e-21 | 0.41  | 33.68 | 1.45e+8  |
| 528 | B1541-52   | 15:44:59.8 | -53:08:46.9 | 0.18 | 6.03e-17 | 11.0  | 10.26 | 5.89e+11 |
| 529 | J1545-4550 | 15:45:55.9 | -45:50:37.5 | 0.00 | 5.25e-20 | 0.3   | 68.78 | 4.7e+8   |
| 530 | J1546-5302 | 15:46:07.4 | -53:02:23.0 | 0.58 | 1.18e-14 | 18.0  | 11.27 | 1.36e+13 |
| 531 | J1547-0944 | 15:47:46.0 | -09:44:07.8 | 1.58 | 2.94e-15 | 43.0  | 7.74  | 1.62e+13 |
| 532 | J1547-5709 | 15:47:24.1 | -57:09:17.5 | 0.00 | 7.45e-21 | 0.9   | 21.06 | 5.36e+8  |
| 533 | J1547-5750 | 15:47:30.6 | -57:50:29.4 | 0.65 | 2.56e-17 | 61.0  | 3.54  | 2.11e+12 |
| 534 | J1547-5839 | 15:47:34.9 | -58:39:09.8 | 0.24 | 5.94e-16 | 42.0  | 3.25  | 6.76e+12 |
| 535 | J1548-4927 | 15:48:19.4 | -49:27:40.4 | 0.60 | 4.05e-15 | 18.0  | 11.48 | 7.94e+12 |
| 536 | J1548-5607 | 15:48:44.0 | -56:07:34.3 | 0.17 | 1.07e-14 | 22.0  | 5.11  | 1.54e+13 |
| 537 | J1549+2113 | 15:49:40.9 | +21:13:26.9 | 1.26 | 8.54e-16 | 23.0  | 13.02 | 4.66e+12 |
| 538 | J1549-4848 | 15:49:21.0 | -48:48:35.5 | 0.29 | 1.41e-14 | 12.0  | 11.93 | 9.87e+12 |
| 539 | J1550-5242 | 15:50:02.9 | -52:42:07.0 | 0.75 | 1.78e-14 | 23.0  | 10.01 | 2.13e+13 |
| 540 | J1551-4424 | 15:51:48.0 | -44:24:42   | 0.67 | 1.88e-16 | 76.0  | 2.91  | 7.86e+12 |
| 541 | J1551-6214 | 15:51:36.7 | -62:14:23.3 | 0.20 | 2.28e-17 | 6.6   | 18.17 | 2.18e+11 |
| 542 | B1550-54   | 15:53:59.6 | -54:56:06.2 | 1.08 | 1.57e-14 | 130.0 | 2.16  | 1.1e+14  |
| 543 | J1555-0515 | 15:55:40.0 | -05:15:57.4 | 0.98 | 2.05e-15 | 19.0  | 13.87 | 5.97e+12 |
| 544 | B1552-23   | 15:55:33.1 | -23:41:09.9 | 0.53 | 6.94e-16 | 27.0  | 7.19  | 4.92e+12 |
| 545 | B1552-31   | 15:55:17.9 | -31:34:20.1 | 0.52 | 6.22e-17 | 33.0  | 5.81  | 1.8e+12  |
| 546 | J1557-4258 | 15:57:00.2 | -42:58:12.6 | 0.33 | 3.3e-16  | 17.0  | 8.99  | 2.14e+12 |
| 547 | J1557-5151 | 15:57:29.3 | -51:51:08.4 | 0.41 | 7.54e-17 | 63.5  | 2.77  | 3.68e+12 |
| 548 | J1558-5756 | 15:58:30.5 | -57:56:26.1 | 1.12 | 1.86e-13 | 22.0  | 12.83 | 6.58e+13 |
| 549 | B1556-44   | 15:59:41.5 | -44:38:45.9 | 0.26 | 1.02e-15 | 17.0  | 7.96  | 3.74e+12 |
| 550 | B1555-55   | 15:59:20.7 | -55:45:47   | 0.96 | 1.99e-14 | 24.0  | 10.84 | 2.35e+13 |
| 551 | J1600-3053 | 16:00:51.9 | -30:53:49.3 | 0.00 | 9.5e-21  | 0.42  | 42.31 | 2.78e+8  |
| 552 | B1557-50   | 16:00:53.0 | -50:44:21.3 | 0.19 | 5.06e-15 | 13.0  | 9.02  | 6.37e+12 |
| 553 | B1556-57   | 16:00:19.9 | -57:51:15.3 | 0.19 | 2.13e-15 | 23.0  | 5.19  | 7.2e+12  |
| 554 | J1600-5916 | 16:00:35.0 | -59:16:59   | 1.25 | 8.87e-16 | 146.0 | 2.07  | 2.95e+13 |
| 555 | B1558-50   | 16:02:18.7 | -51:00:06.1 | 0.86 | 6.94e-14 | 26.0  | 9.50  | 4.75e+13 |
| 556 | J1603-2531 | 16:03:04.8 | -25:31:47.9 | 0.28 | 1.59e-15 | 11.0  | 12.91 | 3.38e+12 |
| 557 | B1600-27   | 16:03:08.0 | -27:13:27.6 | 0.78 | 3.01e-15 | 32.0  | 7.32  | 1.22e+13 |
| 558 | J1603-3539 | 16:03:53.6 | -35:39:57.1 | 0.14 | 1.24e-16 | 15.0  | 6.77  | 1.14e+12 |
| 559 | J1603-5312 | 16:03:50.8 | -53:12:58.0 | 0.84 | 4.96e-14 | 45.9  | 5.30  | 7.64e+13 |
| 560 | J1603-5657 | 16:03:31.4 | -56:57:44.1 | 0.50 | 2.79e-15 | 7.3   | 26.41 | 2.68e+12 |
| 561 | J1603-7202 | 16:03:35.6 | -72:02:32.7 | 0.01 | 1.56e-20 | 1.71  | 19.61 | 1.45e+9  |
| 562 | J1604-4718 | 16:04:29.4 | -47:18:47.9 | 0.53 | 4.96e-15 | 21.0  | 9.19  | 1.24e+13 |
| 563 | B1600-49   | 16:04:22.9 | -49:09:57.9 | 0.33 | 1.02e-15 | 12.0  | 12.72 | 2.66e+12 |
| 564 | J1604-7203 | 16:04:29.1 | -72:03:30.4 | 0.34 | 8.4e-17  | 33.0  | 4.75  | 2.68e+12 |

|     |            |            |             |      |          |       |       |          |
|-----|------------|------------|-------------|------|----------|-------|-------|----------|
| 565 | B1601-52   | 16:05:16.2 | -52:57:34.8 | 0.66 | 2.56e-16 | 78.0  | 2.81  | 8.47e+12 |
| 566 | B1604-00   | 16:07:12.0 | -00:32:41.5 | 0.42 | 3.06e-16 | 17.0  | 10.17 | 2.6e+12  |
| 567 | J1607-6449 | 16:07:48.7 | -64:49:43.0 | 0.30 | 2.49e-17 | 16.0  | 9.09  | 5.52e+11 |
| 568 | J1609-1930 | 16:09:05.3 | -19:30:08   | 1.56 | 5.09e-16 | 26.8  | 12.40 | 4.2e+12  |
| 569 | J1609-4616 | 16:09:41.1 | -46:16:22.5 | 0.25 | 5.01e-16 | 7.1   | 18.95 | 1.1e+12  |
| 570 | B1607-13   | 16:10:42.7 | -13:22:22   | 1.02 | 2.3e-16  | 89.8  | 3.01  | 9.34e+12 |
| 571 | J1610-5006 | 16:10:44.3 | -50:06:42.2 | 0.48 | 1.36e-14 | 155.0 | 1.41  | 1.52e+14 |
| 572 | J1611-4949 | 16:11:46.6 | -49:49:57.2 | 0.67 | 5.42e-16 | 57.0  | 3.83  | 9.1e+12  |
| 573 | B1607-52   | 16:11:03.3 | -52:09:22.1 | 0.18 | 5.17e-15 | 2.8   | 44.70 | 1.4e+12  |
| 574 | J1611-5847 | 16:11:51.3 | -58:47:42.3 | 0.35 | 2.01e-18 | 5.9   | 27.73 | 5.81e+10 |
| 575 | J1612-2408 | 16:12:26.0 | -24:08:04   | 0.92 | 1.57e-15 | 31.8  | 8.02  | 8.73e+12 |
| 576 | J1612-5022 | 16:12:28.0 | -50:22:57.3 | 1.37 | 3.4e-17  | 50.4  | 6.15  | 2.36e+12 |
| 577 | J1612-5805 | 16:12:27.8 | -58:05:29.2 | 0.62 | 9.35e-16 | 17.0  | 12.29 | 3.61e+12 |
| 578 | B1609-47   | 16:13:29.0 | -47:14:26.4 | 0.38 | 6.34e-16 | 14.0  | 11.77 | 2.44e+12 |
| 579 | B1612+07   | 16:14:40.9 | +07:37:31.0 | 1.21 | 2.36e-15 | 25.0  | 11.69 | 8.43e+12 |
| 580 | J1614-2230 | 16:14:36.5 | -22:30:31.2 | 0.00 | 9.62e-21 | 0.61  | 26.83 | 3.9e+8   |
| 581 | J1614-3846 | 16:14:42.5 | -38:46:35   | 0.46 | 9.2e-16  | 44.73 | 4.09  | 9.28e+12 |
| 582 | J1614-3937 | 16:14:31.2 | -39:37:28.8 | 0.41 | 1.59e-16 | 27.0  | 6.30  | 2.35e+12 |
| 583 | B1610-50   | 16:14:11.2 | -50:48:03.5 | 0.23 | 4.95e-13 | 37.0  | 3.59  | 1.73e+14 |
| 584 | J1615-4958 | 16:15:17.3 | -49:58:02.0 | 0.56 | 1.46e-15 | 61.8  | 3.26  | 1.61e+13 |
| 585 | J1615-5444 | 16:15:01.1 | -54:44:32.4 | 0.36 | 3.38e-16 | 15.0  | 10.67 | 1.91e+12 |
| 586 | B1611-55   | 16:15:40.4 | -55:37:00.5 | 0.79 | 2e-15    | 22.0  | 10.75 | 6.82e+12 |
| 587 | J1616-5017 | 16:16:29.8 | -50:17:14.9 | 0.49 | 4.66e-14 | 20.5  | 9.09  | 3.64e+13 |
| 588 | J1617-4608 | 16:17:35.1 | -46:08:36.5 | 0.57 | 1.65e-14 | 17.0  | 11.80 | 1.51e+13 |
| 589 | J1617-5055 | 16:17:29.3 | -50:55:13.2 | 0.07 | 1.35e-13 | 11.0  | 6.61  | 2.69e+13 |
| 590 | J1618-4624 | 16:18:52.7 | -46:24:34.9 | 0.01 | 3.1e-21  | 1.02  | 21.44 | 3.75e+8  |
| 591 | J1618-4723 | 16:18:06.8 | -47:23:19.1 | 0.20 | 1.99e-15 | 15.0  | 8.04  | 4.61e+12 |
| 592 | J1621-5039 | 16:21:04.7 | -50:39:48.6 | 1.08 | 1.3e-14  | 42.0  | 6.58  | 3.32e+13 |
| 593 | J1621-5243 | 16:21:55.8 | -52:43:44   | 0.37 | 7.68e-16 | 35.0  | 4.67  | 6.64e+12 |
| 594 | J1622-3751 | 16:22:04.5 | -37:51:13.9 | 0.73 | 2.57e-15 | 48.0  | 4.74  | 1.68e+13 |
| 595 | J1622-4332 | 16:22:45.4 | -43:32:28.2 | 0.92 | 1.56e-15 | 41.0  | 6.20  | 1.12e+13 |
| 596 | J1622-4347 | 16:22:30.0 | -43:47:21.4 | 0.46 | 5.05e-15 | 15.0  | 12.02 | 7.39e+12 |
| 597 | J1622-4802 | 16:22:47.1 | -48:02:13.1 | 0.27 | 3.07e-16 | 43.0  | 3.30  | 5.83e+12 |
| 598 | J1622-4845 | 16:22:05.4 | -48:46:29   | 0.74 | 1.1e-16  | 42.3  | 5.39  | 3.64e+12 |
| 599 | B1620-09   | 16:23:17.6 | -09:08:48.7 | 1.28 | 2.58e-15 | 19.0  | 15.91 | 6.7e+12  |
| 600 | B1620-26   | 16:23:38.2 | -26:31:53.7 | 0.01 | 6.71e-19 | 2.71  | 11.41 | 1.39e+10 |
| 601 | B1620-42   | 16:23:48.2 | -42:56:52.6 | 0.36 | 1.01e-15 | 29.0  | 5.56  | 6.33e+12 |
| 602 | J1623-4949 | 16:23:54.8 | -49:49:04   | 0.73 | 4.21e-14 | 31.0  | 7.30  | 4.4e+13  |
| 603 | J1624-4411 | 16:24:21.3 | -44:11:33.8 | 0.23 | 7.99e-16 | 51.0  | 2.71  | 9.24e+12 |
| 604 | J1624-4613 | 16:24:18.7 | -46:13:02   | 0.87 | 6.07e-17 | 197.0 | 1.36  | 9.78e+12 |
| 605 | J1624+5850 | 16:24:00.9 | +58:50:15.7 | 0.65 | 3.31e-16 | 27.0  | 7.94  | 3.4e+12  |
| 606 | J1624+8643 | 16:24:32.7 | +86:43:13.2 | 0.40 | 2.55e-16 | 12.0  | 14.00 | 1.33e+12 |
| 607 | J1625-4913 | 16:25:16.4 | -49:13:44.6 | 0.36 | 6.65e-15 | 23.0  | 6.91  | 1.29e+13 |
| 608 | J1626-4537 | 16:26:48.9 | -45:37:25.6 | 0.37 | 8.28e-15 | 24.0  | 6.76  | 1.51e+13 |
| 609 | J1626-6621 | 16:26:06.8 | -66:21:15.2 | 0.45 | 7.66e-16 | 22.0  | 8.12  | 4.21e+12 |
| 610 | J1627+1419 | 16:27:18.7 | +14:19:20.7 | 0.49 | 3.93e-16 | 40.0  | 4.68  | 5.45e+12 |
| 611 | J1627-4706 | 16:27:28.7 | -47:06:50.2 | 0.14 | 1.73e-15 | 23.0  | 4.51  | 6.36e+12 |
| 612 | J1627-4845 | 16:27:10.3 | -48:45:08   | 0.61 | 3.64e-15 | 170.0 | 1.38  | 6.25e+13 |
| 613 | J1627-5547 | 16:27:21.0 | -55:47:52.4 | 0.35 | 7.38e-16 | 24.0  | 6.60  | 4.49e+12 |
| 614 | J1627-5936 | 16:27:52.5 | -59:36:55.3 | 0.35 | 8e-18    | 119.0 | 1.60  | 1.93e+12 |
| 615 | J1628-4804 | 16:28:26.8 | -48:04:59   | 0.87 | 1.24e-15 | 255.0 | 1.12  | 5.38e+13 |
| 616 | J1629-3825 | 16:29:14.6 | -38:25:29.3 | 0.53 | 4.44e-16 | 14.0  | 13.83 | 2.46e+12 |
| 617 | J1629-6902 | 16:29:08.7 | -69:02:45.2 | 0.01 | 1e-20    | 1.0   | 21.95 | 6.63e+8  |
| 618 | J1630+3734 | 16:30:36.4 | +37:34:42.0 | 0.00 | 1.08e-20 | 1.9   | 14.95 | 7.42e+8  |
| 619 | J1630-4719 | 16:30:02.4 | -47:19:42   | 0.56 | 1.42e-14 | 19.0  | 10.47 | 1.57e+13 |
| 620 | J1631-4155 | 16:31:18.3 | -41:55:03.7 | 0.55 | 8.81e-18 | 28.0  | 7.05  | 5.75e+11 |
| 621 | J1632-1013 | 16:32:54.2 | -10:13:18   | 0.72 | 6.6e-17  | 34.0  | 6.62  | 1.91e+12 |
| 622 | J1632-4621 | 16:32:49.8 | -46:21:48.6 | 1.71 | 7.6e-14  | 42.0  | 8.26  | 8.32e+13 |
| 623 | B1630-44   | 16:33:47.0 | -44:53:07.8 | 0.44 | 6.2e-15  | 30.0  | 5.87  | 1.63e+13 |
| 624 | B1629-50   | 16:33:00.0 | -50:15:08.3 | 0.35 | 3.79e-15 | 21.0  | 7.53  | 8.93e+12 |
| 625 | J1634-5107 | 16:34:04.9 | -51:07:45.6 | 0.51 | 1.57e-15 | 39.0  | 4.88  | 1.63e+13 |
| 626 | J1634-5640 | 16:34:19.1 | -56:40:48.7 | 0.22 | 4.1e-17  | 16.0  | 7.90  | 7.55e+11 |
| 627 | J1635-1511 | 16:35:47.3 | -15:11:52   | 1.18 | 2.32e-16 | 262.0 | 1.19  | 2.55e+13 |
| 628 | B1633+24   | 16:35:25.7 | +24:18:47.3 | 0.49 | 1.19e-16 | 18.3  | 10.18 | 1.38e+12 |
| 629 | J1635-4944 | 16:35:55.4 | -49:44:36   | 0.67 | 8.79e-15 | 95.0  | 2.36  | 5.98e+13 |

|     |            |            |             |      |          |       |       |          |
|-----|------------|------------|-------------|------|----------|-------|-------|----------|
| 630 | B1630-59   | 16:35:09.0 | -59:54:41   | 0.53 | 1.37e-15 | 33.0  | 5.87  | 8.43e+12 |
| 631 | J1636-2614 | 16:36:11.5 | -26:14:47.0 | 0.51 | 4.06e-15 | 13.0  | 14.69 | 5.75e+12 |
| 632 | J1637-4450 | 16:37:53.1 | -44:50:26.3 | 0.25 | 5.75e-16 | 107.0 | 1.70  | 1.3e+13  |
| 633 | B1634-45   | 16:37:58.6 | -45:53:26.8 | 0.12 | 3.19e-15 | 5.9   | 15.68 | 2.3e+12  |
| 634 | J1638-3815 | 16:38:37.3 | -38:15:03.4 | 0.70 | 7.7e-17  | 70.0  | 3.21  | 4.2e+12  |
| 635 | J1638+4005 | 16:38:16.2 | +40:05:56.3 | 0.77 | 1.83e-16 | 29.7  | 7.83  | 2.78e+12 |
| 636 | J1638-4233 | 16:38:24.7 | -42:33:55   | 0.51 | 1.01e-14 | 44.0  | 4.35  | 3.33e+13 |
| 637 | J1638-4725 | 16:38:12.9 | -47:25:32   | 0.76 | 4.79e-15 | 132.0 | 1.84  | 6.37e+13 |
| 638 | J1638-5226 | 16:38:59.9 | -52:26:57.4 | 0.34 | 2.65e-15 | 29.0  | 5.38  | 1.24e+13 |
| 639 | J1639-4359 | 16:39:06.8 | -43:59:52   | 0.59 | 1.5e-17  | 35.0  | 5.83  | 9.36e+11 |
| 640 | B1635-45   | 16:39:21.2 | -46:04:33.1 | 0.26 | 2.89e-15 | 17.0  | 8.07  | 6.3e+12  |
| 641 | B1636-47   | 16:40:13.0 | -47:15:38.1 | 0.52 | 4.21e-14 | 81.0  | 2.44  | 1.11e+14 |
| 642 | J1641-2347 | 16:41:18.0 | -23:47:36   | 1.09 | 4.11e-17 | 90.0  | 3.10  | 3.96e+12 |
| 643 | J1641+8049 | 16:41:20.8 | +80:49:52.9 | 0.00 | 8.95e-21 | 0.32  | 42.44 | 2.17e+8  |
| 644 | J1643-1224 | 16:43:38.1 | -12:24:58.6 | 0.00 | 1.85e-20 | 0.93  | 21.12 | 8.21e+8  |
| 645 | J1643+1338 | 16:43:54.1 | +13:38:43.9 | 1.10 | 7.78e-16 | 31.0  | 8.98  | 6.0e+12  |
| 646 | J1643-4505 | 16:43:36.9 | -45:05:45.8 | 0.24 | 3.18e-14 | 19.0  | 6.86  | 2.33e+13 |
| 647 | J1643-4550 | 16:43:13.5 | -45:50:54.5 | 0.72 | 3e-14    | 28.0  | 8.03  | 3.36e+13 |
| 648 | B1641-45   | 16:44:49.2 | -45:59:09.7 | 0.46 | 2.01e-14 | 13.32 | 13.51 | 1.31e+13 |
| 649 | B1642-03   | 16:45:02.0 | -03:17:57.8 | 0.39 | 1.78e-15 | 7.9   | 21.31 | 2.31e+12 |
| 650 | J1645+1012 | 16:45:34.4 | +10:12:16.0 | 0.41 | 8.13e-17 | 20.0  | 8.53  | 1.25e+12 |
| 651 | J1646-2142 | 16:46:18.6 | -21:42:02.4 | 0.01 | 8.34e-21 | 2.0   | 12.43 | 1.38e+9  |
| 652 | B1643-43   | 16:46:51.3 | -43:46:38   | 0.23 | 1.13e-13 | 70.0  | 2.12  | 1.4e+14  |
| 653 | J1646-5123 | 16:46:36.3 | -51:23:14.6 | 0.53 | 2.1e-15  | 24.0  | 8.06  | 7.61e+12 |
| 654 | B1641-68   | 16:46:54.9 | -68:31:51.7 | 1.79 | 1.7e-15  | 98.0  | 3.62  | 2.79e+13 |
| 655 | J1647-3607 | 16:47:46.5 | -36:07:04   | 0.21 | 1.29e-16 | 15.0  | 8.21  | 1.17e+12 |
| 656 | J1647+6608 | 16:47:32.5 | +66:08:22.2 | 1.60 | 7.84e-15 | 55.0  | 6.10  | 3.38e+13 |
| 657 | J1648-3256 | 16:48:06.0 | -32:56:40.8 | 0.72 | 3.53e-15 | 17.0  | 13.30 | 7.74e+12 |
| 658 | J1648-6044 | 16:48:51.2 | -60:44:25.5 | 0.58 | 4.29e-16 | 27.0  | 7.52  | 3.87e+12 |
| 659 | J1649+2533 | 16:49:44.2 | +25:33:07.0 | 1.02 | 5.59e-16 | 38.0  | 7.03  | 6.22e+12 |
| 660 | J1649-3805 | 16:49:48.2 | -38:05:59.1 | 0.26 | 3.67e-17 | 32.0  | 4.33  | 1.31e+12 |
| 661 | J1649-3935 | 16:49:06.6 | -39:35:44.2 | 0.77 | 3.91e-17 | 45.7  | 5.11  | 1.97e+12 |
| 662 | J1649-4349 | 16:49:20.4 | -43:49:22.2 | 0.87 | 4.4e-17  | 192.0 | 1.39  | 8.15e+12 |
| 663 | J1650-1654 | 16:50:27.1 | -16:54:42.2 | 1.75 | 3.2e-15  | 62.0  | 5.65  | 2.43e+13 |
| 664 | J1650-4126 | 16:50:13.1 | -41:26:33.8 | 0.31 | 1.98e-17 | 13.0  | 11.40 | 4.52e+11 |
| 665 | J1650-4502 | 16:50:32.3 | -45:02:37.3 | 0.38 | 1.61e-14 | 19.0  | 8.64  | 1.67e+13 |
| 666 | B1648-17   | 16:51:31.7 | -17:09:22   | 0.97 | 3.04e-15 | 34.0  | 7.70  | 1.3e+13  |
| 667 | B1648-42   | 16:51:48.7 | -42:46:09.9 | 0.84 | 4.75e-15 | 152.0 | 1.68  | 6.89e+13 |
| 668 | B1647-52   | 16:51:42.9 | -52:22:58.3 | 0.64 | 1.81e-15 | 22.0  | 9.63  | 6.49e+12 |
| 669 | B1647-528  | 16:51:41.4 | -52:55:47.7 | 0.89 | 2.12e-15 | 65.0  | 3.87  | 2.6e+13  |
| 670 | J1651-7642 | 16:51:07.8 | -76:42:39.5 | 1.76 | 1.36e-15 | 105.0 | 3.35  | 2.67e+13 |
| 671 | J1652-1400 | 16:52:16.6 | -14:00:27.4 | 0.31 | 1.76e-17 | 23.1  | 6.39  | 6.67e+11 |
| 672 | B1649-23   | 16:52:58.5 | -24:03:51   | 1.70 | 3.16e-15 | 52.1  | 6.64  | 2.31e+13 |
| 673 | J1652+2651 | 16:52:03.0 | +26:51:40.4 | 0.92 | 6.54e-16 | 48.0  | 5.30  | 8.49e+12 |
| 674 | B1650-38   | 16:53:39.7 | -38:38:20.8 | 0.31 | 2.79e-15 | 14.0  | 10.51 | 5.12e+12 |
| 675 | J1653-4030 | 16:53:34.2 | -40:30:01.4 | 1.02 | 4.36e-16 | 161.0 | 1.73  | 2.24e+13 |
| 676 | J1653-4105 | 16:53:25.3 | -41:05:25.6 | 0.50 | 5.41e-17 | 45.0  | 4.20  | 2.27e+12 |
| 677 | J1653-4249 | 16:53:40.2 | -42:49:03.3 | 0.61 | 4.81e-15 | 35.0  | 5.95  | 1.68e+13 |
| 678 | J1654-2713 | 16:54:23.6 | -27:13:02   | 0.79 | 1.68e-16 | 32.0  | 7.38  | 2.87e+12 |
| 679 | J1654-3710 | 16:54:44.4 | -37:10:57.1 | 0.94 | 7.35e-16 | 32.0  | 8.04  | 6.13e+12 |
| 680 | J1655-3048 | 16:55:24.5 | -30:48:42   | 0.54 | 3.66e-17 | 108.0 | 1.92  | 4.25e+12 |
| 681 | J1656-3621 | 16:56:32.9 | -36:21:59.7 | 0.73 | 1.28e-15 | 36.0  | 6.30  | 8.91e+12 |
| 682 | J1656+6203 | 16:56:10.2 | +62:03:50.4 | 0.78 | 8.44e-16 | 30.4  | 7.69  | 6.12e+12 |
| 683 | J1657+3304 | 16:57:50.6 | +33:04:33.6 | 1.57 | 1.73e-15 | 49.8  | 6.67  | 1.44e+13 |
| 684 | J1657-4432 | 16:57:36.7 | -44:32:20   | 0.61 | 8.2e-15  | 31.0  | 6.69  | 1.94e+13 |
| 685 | J1658+3630 | 16:58:26.5 | +36:30:30.0 | 0.03 | 1.16e-19 | 6.12  | 8.33  | 1.37e+10 |
| 686 | J1658-4958 | 16:58:54.9 | -49:58:58.4 | 0.42 | 3.86e-15 | 27.0  | 6.37  | 1.16e+13 |
| 687 | B1657-13   | 16:59:53.0 | -13:05:09.0 | 0.64 | 6.18e-16 | 68.0  | 3.17  | 1.15e+13 |
| 688 | J1700-3312 | 17:00:52.9 | -33:12:46.5 | 1.36 | 4.71e-15 | 49.0  | 6.31  | 2.33e+13 |
| 689 | J1700-3611 | 17:00:49.3 | -36:11:53   | 1.49 | 4.32e-15 | 60.0  | 5.40  | 2.73e+13 |
| 690 | J1700-4012 | 17:00:38.5 | -40:12:38.6 | 0.28 | 9.91e-17 | 27.0  | 5.30  | 1.84e+12 |
| 691 | J1700-4422 | 17:00:53.6 | -44:22:27   | 0.76 | 4e-17    | 72.0  | 3.24  | 3.12e+12 |
| 692 | J1700-4939 | 17:00:22.5 | -49:39:15   | 0.58 | 1.08e-15 | 79.0  | 2.62  | 1.75e+13 |
| 693 | J1701-3130 | 17:01:43.5 | -31:30:36.7 | 0.29 | 5.6e-17  | 17.0  | 8.46  | 8.78e+11 |
| 694 | B1657-45   | 17:01:29.1 | -45:33:48.7 | 0.32 | 5.19e-16 | 42.0  | 3.68  | 6.46e+12 |

|     |            |            |             |      |          |       |       |          |
|-----|------------|------------|-------------|------|----------|-------|-------|----------|
| 695 | J1702-4128 | 17:02:52.5 | -41:28:48.2 | 0.18 | 5.23e-14 | 36.0  | 3.34  | 5.36e+13 |
| 696 | J1702-4310 | 17:02:26.9 | -43:10:40   | 0.24 | 2.24e-13 | 23.0  | 5.73  | 7.45e+13 |
| 697 | B1700-18   | 17:03:51.0 | -18:46:14.8 | 0.80 | 1.73e-15 | 23.0  | 10.37 | 6.63e+12 |
| 698 | B1700-32   | 17:03:22.5 | -32:41:48.0 | 1.21 | 6.6e-16  | 49.0  | 5.96  | 8.72e+12 |
| 699 | J1703-4442 | 17:03:20.5 | -44:42:42   | 1.75 | 1.43e-14 | 56.0  | 6.26  | 4.64e+13 |
| 700 | J1703-4851 | 17:03:54.5 | -48:52:01.0 | 1.40 | 5.07e-15 | 55.0  | 5.70  | 2.71e+13 |
| 701 | J1704-3756 | 17:04:57.4 | -37:56:42.9 | 0.31 | 1.13e-14 | 21.3  | 6.92  | 1.56e+13 |
| 702 | J1704-5236 | 17:04:40.5 | -52:36:57.4 | 0.23 | 5.2e-17  | 24.1  | 5.37  | 1.19e+12 |
| 703 | B1659-60   | 17:04:14.8 | -60:16:54   | 0.31 | 9.1e-16  | 125.0 | 1.56  | 1.96e+13 |
| 704 | B1702-19   | 17:05:36.0 | -19:06:38.6 | 0.30 | 4.14e-15 | 14.0  | 10.41 | 6.23e+12 |
| 705 | J1705-3423 | 17:05:42.3 | -34:23:43.1 | 0.26 | 1.08e-15 | 21.0  | 6.44  | 4.74e+12 |
| 706 | J1705-3950 | 17:05:29.8 | -39:50:59   | 0.32 | 6.06e-14 | 34.0  | 4.47  | 5.7e+13  |
| 707 | J1705-4331 | 17:05:35.9 | -43:31:13.6 | 0.22 | 7.12e-17 | 15.0  | 8.40  | 8.72e+11 |
| 708 | J1705-6135 | 17:05:15.3 | -61:35:15   | 0.81 | 6e-17    | 85.0  | 2.85  | 4.49e+12 |
| 709 | J1706-4434 | 17:06:23.1 | -44:34:30.0 | 0.43 | 2.58e-15 | 21.6  | 8.07  | 7.59e+12 |
| 710 | J1706-6118 | 17:06:09.7 | -61:18:11.7 | 0.36 | 2.92e-16 | 5.3   | 31.55 | 6.29e+11 |
| 711 | B1703-40   | 17:07:21.7 | -40:53:55.1 | 0.58 | 1.92e-15 | 79.0  | 2.63  | 2.33e+13 |
| 712 | J1707-4341 | 17:07:40.1 | -43:41:12.0 | 0.89 | 5.7e-15  | 28.0  | 8.95  | 1.47e+13 |
| 713 | J1707-4729 | 17:07:15.5 | -47:29:34.5 | 0.27 | 1.56e-15 | 42.0  | 3.38  | 1.11e+13 |
| 714 | J1708-3426 | 17:08:57.7 | -34:26:44.0 | 0.69 | 4.21e-15 | 35.0  | 6.32  | 1.57e+13 |
| 715 | J1708-3506 | 17:08:17.6 | -35:06:22.6 | 0.00 | 1.14e-20 | 1.74  | 13.31 | 9.96e+8  |
| 716 | J1708-3641 | 17:08:35.9 | -36:41:21.5 | 0.59 | 1.35e-16 | 78.3  | 2.66  | 6.13e+12 |
| 717 | J1708-4522 | 17:08:12.9 | -45:22:51   | 1.30 | 2.61e-15 | 37.0  | 8.17  | 1.31e+13 |
| 718 | B1701-75   | 17:08:02.5 | -75:39:23   | 1.19 | 1.88e-15 | 45.0  | 6.43  | 1.35e+13 |
| 719 | B1706-16   | 17:09:26.4 | -16:40:57.7 | 0.65 | 6.31e-15 | 19.0  | 11.32 | 1.47e+13 |
| 720 | J1709+2313 | 17:09:05.7 | +23:13:27.8 | 0.00 | 3.63e-21 | 1.14  | 17.73 | 4.31e+8  |
| 721 | J1709-3626 | 17:09:45.1 | -36:26:03.6 | 0.45 | 2.27e-15 | 33.0  | 5.41  | 1.82e+13 |
| 722 | J1709-4401 | 17:09:41.3 | -44:01:11.2 | 0.87 | 7.37e-15 | 20.0  | 12.39 | 1.19e+13 |
| 723 | B1706-44   | 17:09:42.7 | -44:29:08.2 | 0.10 | 9.3e-14  | 13.0  | 6.69  | 2.68e+13 |
| 724 | J1710-2616 | 17:10:04.9 | -26:16:35   | 0.95 | 2e-17    | 96.0  | 2.73  | 2.93e+12 |
| 725 | J1710+4923 | 17:10:04.4 | +49:23:11.4 | 0.00 | 1.82e-20 | 0.74  | 22.71 | 6.35e+8  |
| 726 | B1709-15   | 17:11:55.0 | -15:09:39.7 | 0.87 | 1.1e-15  | 20.0  | 12.41 | 4.6e+12  |
| 727 | J1711-4322 | 17:11:10.5 | -43:22:53.1 | 0.10 | 2.67e-17 | 16.0  | 5.51  | 5.51e+11 |
| 728 | B1707-53   | 17:11:53.1 | -53:50:18.3 | 0.90 | 1.55e-14 | 23.0  | 10.96 | 1.99e+13 |
| 729 | J1712-2715 | 17:12:11.7 | -27:15:53   | 0.26 | 1.28e-15 | 64.0  | 2.32  | 1.43e+13 |
| 730 | J1713+0747 | 17:13:49.5 | +07:47:37.4 | 0.00 | 8.53e-21 | 0.39  | 53.94 | 2.47e+8  |
| 731 | J1713+7810 | 17:13:27.0 | +78:10:33.9 | 0.43 | 1.14e-16 | 24.0  | 7.29  | 1.77e+12 |
| 732 | J1714-1054 | 17:14:40.1 | -10:54:10.9 | 0.70 | 5.88e-17 | 82.0  | 2.75  | 4.27e+12 |
| 733 | J1715-3859 | 17:15:37.8 | -38:59:25.1 | 0.93 | 4.4e-15  | 128.0 | 2.05  | 5.71e+13 |
| 734 | J1716-3720 | 17:16:11.3 | -37:20:44   | 0.63 | 1.8e-14  | 105.0 | 2.09  | 9.34e+13 |
| 735 | J1716-4111 | 17:16:44.3 | -41:11:09.5 | 1.04 | 2.88e-15 | 33.0  | 8.19  | 1.23e+13 |
| 736 | J1716-4711 | 17:16:01.1 | -47:11:00.9 | 0.56 | 8.33e-16 | 16.0  | 12.42 | 3.2e+12  |
| 737 | B1714-34   | 17:17:20.2 | -34:24:59.6 | 0.66 | 9.8e-15  | 40.0  | 5.39  | 2.73e+13 |
| 738 | J1717-3737 | 17:17:15.9 | -37:37:36   | 0.68 | 5.29e-15 | 68.0  | 3.26  | 3.38e+13 |
| 739 | J1717-3953 | 17:17:25.5 | -39:53:55   | 1.09 | 3.3e-17  | 367.0 | 0.91  | 1.2e+13  |
| 740 | B1713-40   | 17:17:52.3 | -41:03:17.8 | 0.89 | 3.7e-15  | 14.0  | 18.07 | 5.91e+12 |
| 741 | J1717-5800 | 17:17:35.6 | -58:00:05.4 | 0.32 | 1.96e-16 | 30.0  | 5.07  | 2.88e+12 |
| 742 | J1718-3825 | 17:18:13.5 | -38:25:18.0 | 0.07 | 1.32e-14 | 12.0  | 6.29  | 9.17e+12 |
| 743 | J1718-4539 | 17:18:11.9 | -45:39:15.9 | 0.59 | 7.51e-15 | 36.0  | 5.68  | 2.15e+13 |
| 744 | J1719-1438 | 17:19:10.0 | -14:38:00.9 | 0.01 | 8.04e-21 | 1.0   | 21.62 | 5.93e+8  |
| 745 | J1719-2330 | 17:19:36.1 | -23:30:14   | 0.45 | 2.19e-15 | 18.0  | 9.96  | 5.83e+12 |
| 746 | J1719-3458 | 17:19:12.1 | -34:58:22.4 | 0.49 | 1.49e-17 | 25.9  | 7.21  | 6.91e+11 |
| 747 | B1715-40   | 17:19:01.7 | -40:06:59.5 | 0.19 | 1.67e-15 | 14.0  | 8.30  | 3.94e+12 |
| 748 | J1719-4302 | 17:19:48.7 | -43:02:11.4 | 0.24 | 3.92e-16 | 8.3   | 15.66 | 1.14e+12 |
| 749 | B1718-02   | 17:20:57.2 | -02:12:23.9 | 0.48 | 8.28e-17 | 82.0  | 2.34  | 4.93e+12 |
| 750 | B1717-16   | 17:20:25.2 | -16:33:33.7 | 1.57 | 5.8e-15  | 46.0  | 7.21  | 2.43e+13 |
| 751 | J1720+2150 | 17:20:01.3 | +21:50:12.8 | 1.62 | 7.4e-16  | 70.0  | 4.81  | 1.32e+13 |
| 752 | J1720-2446 | 17:20:22.4 | -24:46:27   | 0.87 | 5.93e-16 | 56.0  | 4.44  | 9.41e+12 |
| 753 | B1717-29   | 17:20:34.1 | -29:33:16.2 | 0.62 | 7.46e-16 | 34.0  | 6.16  | 6.42e+12 |
| 754 | J1720-3659 | 17:20:01.9 | -36:59:06.5 | 0.35 | 3.27e-17 | 21.0  | 7.52  | 8.29e+11 |
| 755 | B1718-19   | 17:21:01.4 | -19:36:51   | 1.00 | 1.62e-15 | 46.9  | 5.67  | 1.31e+13 |
| 756 | J1721-2457 | 17:21:05.4 | -24:57:06.1 | 0.00 | 5.54e-21 | 0.92  | 19.44 | 4.23e+8  |
| 757 | B1718-35   | 17:21:32.7 | -35:32:49.6 | 0.28 | 2.52e-14 | 69.0  | 2.24  | 6.87e+13 |
| 758 | B1718-32   | 17:22:02.9 | -32:07:45.3 | 0.48 | 6.45e-16 | 20.0  | 9.18  | 3.52e+12 |
| 759 | B1718-36   | 17:22:09.8 | -36:32:53.3 | 0.40 | 4.46e-15 | 39.0  | 4.35  | 1.78e+13 |



|     |            |            |             |      |          |       |       |          |
|-----|------------|------------|-------------|------|----------|-------|-------|----------|
| 760 | B1719-37   | 17:22:59.2 | -37:12:04.5 | 0.24 | 1.09e-14 | 9.7   | 13.39 | 7.13e+12 |
| 761 | J1722-4400 | 17:22:46.5 | -44:00:33.2 | 0.22 | 3.74e-16 | 7.0   | 17.96 | 9.38e+11 |
| 762 | J1723-3659 | 17:23:07.5 | -36:59:14.2 | 0.20 | 8.03e-15 | 17.0  | 7.09  | 1.46e+13 |
| 763 | J1724-4500 | 17:24:25.8 | -45:00:15   | 1.31 | 3.51e-15 | 38.0  | 7.99  | 1.56e+13 |
| 764 | J1725-0732 | 17:25:12.2 | -07:32:59.2 | 0.24 | 4.3e-16  | 20.0  | 6.56  | 2.85e+12 |
| 765 | J1725-2852 | 17:25:09.9 | -28:52:22   | 1.26 | 1.99e-15 | 79.0  | 3.78  | 2.43e+13 |
| 766 | J1725-3546 | 17:25:42.2 | -35:46:16   | 1.03 | 1.5e-14  | 97.0  | 2.81  | 8.13e+13 |
| 767 | J1725-4043 | 17:25:41.4 | -40:43:11   | 1.47 | 2.79e-15 | 99.0  | 3.25  | 3.6e+13  |
| 768 | J1726-3635 | 17:26:49.6 | -36:35:45.6 | 0.29 | 1.44e-15 | 66.0  | 2.34  | 1.59e+13 |
| 769 | J1727-2739 | 17:27:30.9 | -27:38:53   | 1.29 | 1.07e-15 | 112.0 | 2.72  | 2.51e+13 |
| 770 | J1727-2951 | 17:27:00.4 | -29:51:40.8 | 0.03 | 3.1e-19  | 18.9  | 5.68  | 3.35e+10 |
| 771 | B1726-00   | 17:28:34.8 | -00:07:45.0 | 0.39 | 1.12e-15 | 31.0  | 5.36  | 7.13e+12 |
| 772 | J1728-3733 | 17:28:46.2 | -37:33:08   | 0.62 | 7.2e-17  | 18.0  | 11.60 | 1.59e+12 |
| 773 | J1728-4028 | 17:28:27.6 | -40:28:10   | 0.87 | 2.33e-16 | 120.0 | 2.11  | 1.23e+13 |
| 774 | J1729-2117 | 17:29:10.8 | -21:17:28   | 0.07 | 1.72e-19 | 2.7   | 26.14 | 7.75e+9  |
| 775 | J1730-2304 | 17:30:21.6 | -23:04:31.1 | 0.01 | 2.02e-20 | 1.74  | 14.93 | 1.59e+9  |
| 776 | J1730-2900 | 17:30:08.2 | -29:00:46   | 1.54 | 8.85e-15 | 44.0  | 7.47  | 2.87e+13 |
| 777 | B1727-33   | 17:30:32.5 | -33:50:39.4 | 0.14 | 8.48e-14 | 31.0  | 3.46  | 5.77e+13 |
| 778 | J1731-3322 | 17:31:14.3 | -33:22:45   | 0.54 | 2.81e-14 | 71.4  | 2.81  | 8.78e+13 |
| 779 | B1727-47   | 17:31:42.1 | -47:44:36.2 | 0.83 | 1.64e-13 | 24.0  | 10.09 | 6.74e+13 |
| 780 | J1732-1930 | 17:32:20.0 | -19:30:09   | 0.48 | 1.82e-16 | 23.0  | 8.04  | 2.15e+12 |
| 781 | J1732-3426 | 17:32:07.1 | -34:26:05   | 0.33 | 4.02e-16 | 33.0  | 4.70  | 4.52e+12 |
| 782 | B1729-41   | 17:32:50.0 | -41:28:48   | 0.63 | 1.28e-14 | 24.0  | 8.77  | 1.88e+13 |
| 783 | J1732-5049 | 17:32:47.7 | -50:49:00.1 | 0.01 | 1.42e-20 | 1.76  | 13.31 | 1.21e+9  |
| 784 | B1730-22   | 17:33:26.4 | -22:28:37   | 0.87 | 4.27e-17 | 84.3  | 2.97  | 3.77e+12 |
| 785 | J1733-2533 | 17:33:25.8 | -25:33:11   | 0.66 | 2.1e-15  | 57.0  | 3.81  | 1.79e+13 |
| 786 | J1733-2837 | 17:33:33.9 | -28:37:33   | 0.77 | 1.11e-15 | 20.0  | 11.66 | 4.62e+12 |
| 787 | B1730-37   | 17:33:26.7 | -37:16:55.2 | 0.34 | 1.5e-14  | 57.0  | 2.82  | 4.62e+13 |
| 788 | J1733-4005 | 17:33:58.6 | -40:05:39.7 | 0.56 | 3.62e-15 | 17.0  | 11.74 | 7.92e+12 |
| 789 | J1733-5515 | 17:33:00.4 | -55:15:40   | 1.01 | 4e-16    | 69.0  | 3.88  | 9.51e+12 |
| 790 | B1732-02   | 17:34:45.6 | -02:12:39.1 | 0.84 | 4.21e-16 | 41.7  | 5.83  | 5.92e+12 |
| 791 | J1734-2415 | 17:34:41.6 | -24:15:20   | 0.61 | 1.05e-15 | 49.0  | 4.27  | 1.91e+13 |
| 792 | J1734-2859 | 17:34:00.1 | -28:59:53.4 | 0.30 | 8e-18    | 26.5  | 5.55  | 5.14e+11 |
| 793 | J1734-3058 | 17:34:50.8 | -30:58:41.4 | 0.54 | 1.62e-17 | 22.6  | 8.65  | 6.3e+11  |
| 794 | J1735-0243 | 17:35:48.1 | -2:43:48    | 0.78 | 6.32e-16 | 106.0 | 2.27  | 1.8e+13  |
| 795 | B1732-07   | 17:35:04.9 | -07:24:52.1 | 0.42 | 1.21e-15 | 22.0  | 7.83  | 5.29e+12 |
| 796 | J1737-3102 | 17:37:33.7 | -31:02:00.5 | 0.77 | 3.73e-14 | 31.0  | 7.51  | 4.15e+13 |
| 797 | B1734-35   | 17:37:40.0 | -35:55:43.8 | 0.40 | 6.12e-15 | 16.0  | 10.49 | 8.67e+12 |
| 798 | J1738+0333 | 17:38:53.9 | +03:33:10.8 | 0.01 | 2.41e-20 | 1.44  | 15.72 | 1.4e+9   |
| 799 | J1738-2330 | 17:38:08.8 | -23:30:47   | 1.98 | 8.56e-15 | 69.0  | 5.40  | 4.42e+13 |
| 800 | J1738-2736 | 17:38:14.6 | -27:36:25.8 | 0.63 | 4.62e-15 | 23.7  | 8.88  | 1.12e+13 |
| 801 | J1738-2955 | 17:38:52.1 | -29:55:57.4 | 0.44 | 8.2e-14  | 62.0  | 2.93  | 1.19e+14 |
| 802 | B1735-32   | 17:38:54.1 | -32:11:53.6 | 0.77 | 7.95e-16 | 25.0  | 9.32  | 4.89e+12 |
| 803 | J1739+0612 | 17:39:17.9 | +06:12:28.4 | 0.23 | 1.56e-16 | 15.0  | 8.61  | 1.29e+12 |
| 804 | J1739-1313 | 17:39:57.8 | -13:13:18.6 | 1.22 | 8.17e-17 | 12.0  | 25.05 | 7.53e+11 |
| 805 | B1736-29   | 17:39:34.2 | -29:03:02.2 | 0.32 | 7.87e-15 | 10.0  | 15.20 | 6.15e+12 |
| 806 | J1739-3023 | 17:39:39.7 | -30:23:12.9 | 0.11 | 1.14e-14 | 7.6   | 11.92 | 5.59e+12 |
| 807 | B1736-31   | 17:39:24.3 | -31:31:15.3 | 0.53 | 1.86e-14 | 98.0  | 2.08  | 8.77e+13 |
| 808 | J1739-3951 | 17:39:38.2 | -39:52:00.3 | 0.34 | 1.99e-17 | 19.0  | 8.19  | 5.86e+11 |
| 809 | J1740+1000 | 17:40:25.9 | +10:00:06.3 | 0.15 | 2.15e-14 | 19.0  | 5.60  | 1.89e+13 |
| 810 | B1737+13   | 17:40:07.3 | +13:11:56.6 | 0.80 | 1.45e-15 | 48.0  | 4.96  | 1.26e+13 |
| 811 | B1737-30   | 17:40:33.8 | -30:15:43.5 | 0.61 | 4.66e-13 | 10.0  | 21.05 | 4.74e+13 |
| 812 | J1740-3052 | 17:40:50.0 | -30:52:04.3 | 0.57 | 2.55e-14 | 32.0  | 6.28  | 3.53e+13 |
| 813 | J1740-3327 | 17:40:25.7 | -33:27:53.5 | 0.52 | 3.9e-15  | 23.0  | 8.29  | 9.94e+12 |
| 814 | J1741+1351 | 17:41:31.1 | +13:51:44.1 | 0.00 | 3.02e-20 | 0.32  | 63.15 | 3.82e+8  |
| 815 | J1741-2054 | 17:41:57.2 | -20:53:57.1 | 0.41 | 1.7e-14  | 45.96 | 3.77  | 4.77e+13 |
| 816 | J1741-2719 | 17:41:35.0 | -27:19:23   | 0.35 | 8.06e-17 | 30.0  | 5.25  | 1.85e+12 |
| 817 | J1741-2733 | 17:41:01.3 | -27:33:51   | 0.89 | 1.48e-16 | 55.0  | 4.57  | 4.62e+12 |
| 818 | J1741+2758 | 17:41:53.5 | +27:58:09.0 | 1.36 | 1.84e-15 | 40.0  | 7.73  | 1.19e+13 |
| 819 | J1741-3016 | 17:41:07.0 | -30:16:31   | 1.89 | 8.99e-15 | 111.0 | 3.29  | 7.27e+13 |
| 820 | J1741+3855 | 17:41:12.3 | +38:55:09.9 | 0.83 | 2.06e-16 | 38.7  | 6.25  | 3.84e+12 |
| 821 | B1737-39   | 17:41:18.0 | -39:27:38.2 | 0.51 | 1.71e-15 | 25.0  | 7.61  | 7.15e+12 |
| 822 | J1742-3957 | 17:42:04.4 | -39:57:22   | 1.02 | 8.16e-17 | 120.0 | 2.27  | 7.36e+12 |
| 823 | J1742-4616 | 17:42:26.1 | -46:16:53.5 | 0.41 | 3.38e-17 | 37.0  | 4.65  | 1.47e+12 |
| 824 | B1740-03   | 17:43:08.1 | -03:39:11.5 | 0.44 | 1.56e-15 | 18.0  | 9.86  | 4.92e+12 |

|     |            |            |             |      |          |       |       |          |
|-----|------------|------------|-------------|------|----------|-------|-------|----------|
| 825 | B1740-13   | 17:43:37.6 | -13:51:38.0 | 0.41 | 4.78e-16 | 25.0  | 6.78  | 3.77e+12 |
| 826 | J1743-4212 | 17:43:05.2 | -42:12:02.4 | 0.31 | 7.83e-16 | 15.0  | 9.83  | 2.9e+12  |
| 827 | J1744-1610 | 17:44:16.5 | -16:10:35.8 | 1.76 | 2.38e-15 | 41.0  | 8.58  | 1.39e+13 |
| 828 | J1744-2335 | 17:44:48.4 | -23:35:55   | 1.68 | 8.33e-16 | 59.0  | 5.83  | 1.18e+13 |
| 829 | J1744-3130 | 17:44:05.6 | -31:30:04   | 1.07 | 2.12e-14 | 28.0  | 9.79  | 2.83e+13 |
| 830 | J1744-3922 | 17:44:02.6 | -39:22:21.1 | 0.17 | 1.55e-18 | 6.2   | 18.02 | 5.35e+10 |
| 831 | J1744-5337 | 17:44:38.9 | -53:37:51   | 0.36 | 1.9e-16  | 42.0  | 3.84  | 3.93e+12 |
| 832 | J1745-0129 | 17:45:02.0 | -01:29:18.1 | 1.05 | 6.31e-16 | 19.0  | 14.37 | 3.31e+12 |
| 833 | J1745-0952 | 17:45:09.1 | -09:52:39.6 | 0.02 | 9.25e-20 | 10.0  | 5.98  | 1.3e+10  |
| 834 | J1745+1252 | 17:45:44.1 | +12:52:38.3 | 1.06 | 5.63e-16 | 105.4 | 2.62  | 1.71e+13 |
| 835 | J1745-2758 | 17:45:52.2 | -27:58:38.0 | 0.49 | 4.42e-18 | 42.6  | 4.39  | 6.14e+11 |
| 836 | B1742-30   | 17:45:56.3 | -30:40:22.9 | 0.37 | 1.07e-14 | 21.0  | 7.69  | 1.5e+13  |
| 837 | J1745-3812 | 17:45:15.4 | -38:12:07.3 | 0.70 | 2.43e-15 | 24.0  | 9.25  | 8.2e+12  |
| 838 | J1746+2540 | 17:46:06.8 | +25:40:37.5 | 1.06 | 1.05e-15 | 33.0  | 8.27  | 7.41e+12 |
| 839 | B1745-12   | 17:48:17.4 | -13:00:52.0 | 0.39 | 1.21e-15 | 20.0  | 8.35  | 4.81e+12 |
| 840 | B1746-30   | 17:49:13.4 | -30:02:35   | 0.61 | 7.87e-15 | 88.0  | 2.43  | 5.24e+13 |
| 841 | J1749-4931 | 17:49:23.7 | -49:31:59   | 0.45 | 5.9e-16  | 8.0   | 22.63 | 1.35e+12 |
| 842 | J1749-5417 | 17:49:47.0 | -54:17:30.7 | 0.31 | 1.5e-16  | 22.15 | 6.68  | 1.87e+12 |
| 843 | B1745-56   | 17:49:44.5 | -56:05:19   | 1.33 | 2.12e-15 | 65.0  | 4.71  | 2.7e+13  |
| 844 | J1749+5952 | 17:49:33.2 | +59:52:36.1 | 0.44 | 1.52e-16 | 26.1  | 6.74  | 2.22e+12 |
| 845 | J1750-2438 | 17:50:59.7 | -24:38:58   | 0.71 | 1.08e-14 | 19.0  | 11.83 | 1.37e+13 |
| 846 | J1750-28   | 17:50:04.0 | -28:45:00   | 1.30 | 5.78e-15 | 35.1  | 8.62  | 1.85e+13 |
| 847 | B1747-31   | 17:50:47.3 | -31:57:44.1 | 0.91 | 1.97e-16 | 85.0  | 3.01  | 8.17e+12 |
| 848 | J1750-3503 | 17:50:44.5 | -35:03:08.9 | 0.68 | 3.81e-17 | 114.0 | 2.01  | 4.67e+12 |
| 849 | J1751-2857 | 17:51:32.6 | -28:57:46.5 | 0.00 | 1.12e-20 | 0.74  | 24.43 | 5.12e+8  |
| 850 | J1751-3323 | 17:51:32.7 | -33:23:39.6 | 0.55 | 8.83e-15 | 34.0  | 5.80  | 2.2e+13  |
| 851 | B1747-46   | 17:51:42.1 | -46:57:26.5 | 0.74 | 1.3e-15  | 20.0  | 11.46 | 5.15e+12 |
| 852 | J1752+2359 | 17:52:35.4 | +23:59:48.2 | 0.41 | 6.43e-16 | 11.0  | 15.56 | 1.93e+12 |
| 853 | B1749-28   | 17:52:58.6 | -28:06:37.3 | 0.56 | 8.13e-15 | 12.0  | 16.75 | 7.51e+12 |
| 854 | J1752-2821 | 17:52:24.5 | -28:21:10   | 0.64 | 3.47e-15 | 20.0  | 10.64 | 8.17e+12 |
| 855 | J1753-1914 | 17:53:35.1 | -19:14:58   | 0.06 | 2.02e-18 | 14.0  | 5.15  | 1.27e+11 |
| 856 | J1753-2240 | 17:53:39.8 | -22:40:42   | 0.10 | 9.7e-19  | 8.6   | 9.64  | 5.8e+10  |
| 857 | B1750-24   | 17:53:30.6 | -25:00:25   | 0.53 | 1.41e-14 | 93.2  | 2.17  | 7.3e+13  |
| 858 | J1754-3443 | 17:54:37.3 | -34:43:53.9 | 0.36 | 5.71e-16 | 19.0  | 8.43  | 3.14e+12 |
| 859 | J1754-3510 | 17:54:54.6 | -35:10:43.0 | 0.39 | 7.82e-16 | 12.0  | 13.95 | 2.33e+12 |
| 860 | J1755-0903 | 17:55:10.3 | -09:03:51.6 | 0.19 | 7.81e-16 | 9.7   | 12.03 | 1.87e+12 |
| 861 | J1755-1650 | 17:55:11.6 | -16:50:41   | 0.73 | 6.86e-16 | 26.0  | 8.75  | 4.72e+12 |
| 862 | J1755-2521 | 17:55:59.7 | -25:21:27   | 1.18 | 9.02e-14 | 33.0  | 8.72  | 6.87e+13 |
| 863 | J1755-2550 | 17:55:38.4 | -25:50:22.0 | 0.32 | 2.43e-15 | 25.7  | 5.84  | 8.7e+12  |
| 864 | J1755-26   | 17:55:16.2 | -26:00:00   | 0.43 | 1.23e-14 | 25.7  | 6.80  | 1.97e+13 |
| 865 | J1755-2725 | 17:55:41.8 | -27:25:45   | 0.26 | 1.37e-17 | 28.0  | 4.92  | 7.62e+11 |
| 866 | J1756-2251 | 17:56:46.6 | -22:51:59.3 | 0.03 | 1.02e-18 | 1.6   | 29.24 | 1.12e+10 |
| 867 | B1753-24   | 17:56:57.9 | -24:35:34   | 0.67 | 2.85e-16 | 39.0  | 5.58  | 4.55e+12 |
| 868 | J1757-1500 | 17:57:12.7 | -15:00:28.5 | 0.18 | 1.5e-15  | 4.78  | 24.13 | 1.28e+12 |
| 869 | J1757-1854 | 17:57:03.7 | -18:54:03.3 | 0.02 | 2.63e-18 | 1.8   | 22.32 | 2.37e+10 |
| 870 | J1757-2223 | 17:57:50.7 | -22:23:49   | 0.19 | 7.82e-16 | 5.0   | 23.40 | 9.7e+11  |
| 871 | B1754-24   | 17:57:29.3 | -24:22:07.4 | 0.23 | 1.3e-14  | 19.0  | 6.81  | 1.49e+13 |
| 872 | J1757-5322 | 17:57:15.1 | -53:22:26.3 | 0.01 | 2.63e-20 | 2.3   | 12.20 | 2.31e+9  |
| 873 | J1758-2846 | 17:58:15.4 | -28:46:02   | 0.77 | 9.41e-17 | 30.0  | 7.75  | 2.16e+12 |
| 874 | J1758+3030 | 17:58:25.8 | +30:30:24.0 | 0.95 | 7.2e-16  | 42.0  | 6.15  | 7.8e+12  |
| 875 | J1759-1736 | 17:59:28.1 | -17:36:10   | 0.80 | 2.55e-16 | 44.0  | 5.40  | 4.85e+12 |
| 876 | B1756-22   | 17:59:24.1 | -22:05:33   | 0.46 | 1.09e-14 | 11.0  | 16.54 | 7.97e+12 |
| 877 | J1759-2307 | 17:59:30.9 | -23:07:17   | 0.56 | 3.76e-15 | 52.0  | 3.85  | 2.18e+13 |
| 878 | J1759-2922 | 17:59:48.2 | -29:22:07   | 0.57 | 4.63e-15 | 20.0  | 10.08 | 9.43e+12 |
| 879 | J1759-3107 | 17:59:22.0 | -31:07:21.8 | 1.08 | 3.77e-15 | 24.0  | 11.51 | 1.22e+13 |
| 880 | J1800-0125 | 18:00:22.0 | -01:25:30.6 | 0.78 | 1.15e-14 | 51.0  | 4.62  | 3.77e+13 |
| 881 | J1800+5034 | 18:00:44.3 | +50:34:21.7 | 0.58 | 1.17e-16 | 20.0  | 10.11 | 1.5e+12  |
| 882 | B1758-03   | 18:01:22.6 | -03:57:55.7 | 0.92 | 3.31e-15 | 33.0  | 7.72  | 1.32e+13 |
| 883 | J1801-1417 | 18:01:51.0 | -14:17:34.5 | 0.00 | 5.3e-21  | 1.3   | 15.44 | 5.27e+8  |
| 884 | B1758-23   | 18:01:19.8 | -23:04:44.6 | 0.42 | 1.13e-13 | 265.0 | 1.42  | 2.81e+14 |
| 885 | B1757-24   | 18:01:00.0 | -24:51:27.5 | 0.12 | 1.28e-13 | 12.0  | 7.92  | 2.94e+13 |
| 886 | B1758-29   | 18:01:46.8 | -29:20:38.1 | 1.08 | 3.29e-15 | 61.0  | 4.53  | 2.42e+13 |
| 887 | J1801-3210 | 18:01:25.8 | -32:10:53.7 | 0.01 | 7.22e-23 | 2.5   | 11.12 | 1.22e+8  |
| 888 | J1801-3458 | 18:01:52.6 | -34:58:37   | 1.39 | 3.97e-16 | 110.0 | 2.86  | 1.51e+13 |
| 889 | J1802+0128 | 18:02:27.4 | +01:28:23.7 | 0.55 | 2.11e-15 | 22.0  | 8.99  | 7.0e+12  |

|     |            |            |             |      |          |       |       |          |
|-----|------------|------------|-------------|------|----------|-------|-------|----------|
| 890 | J1802-0523 | 18:02:12.1 | -5:23:29    | 1.68 | 2.65e-15 | 146.0 | 2.37  | 5.15e+13 |
| 891 | J1802-2124 | 18:02:05.3 | -21:24:03.6 | 0.01 | 7.26e-20 | 0.74  | 44.77 | 1.38e+9  |
| 892 | B1800-21   | 18:03:51.4 | -21:37:07.3 | 0.13 | 1.34e-13 | 44.0  | 2.64  | 9.29e+13 |
| 893 | B1800-27   | 18:03:31.6 | -27:12:06   | 0.33 | 1.71e-17 | 32.0  | 4.85  | 9.51e+11 |
| 894 | J1803-3329 | 18:03:44.4 | -33:29:10.7 | 0.63 | 3.37e-16 | 21.0  | 10.08 | 2.67e+12 |
| 895 | J1804-2717 | 18:04:21.1 | -27:17:31.3 | 0.01 | 4.09e-20 | 5.9   | 9.41  | 3.83e+9  |
| 896 | B1802+03   | 18:05:10.1 | +03:06:30.2 | 0.22 | 9.99e-16 | 12.0  | 10.40 | 2.62e+12 |
| 897 | J1805-0619 | 18:05:31.4 | -06:19:45.4 | 0.45 | 9.69e-16 | 27.0  | 6.65  | 5.8e+12  |
| 898 | J1805-1504 | 18:05:06.1 | -15:04:36   | 1.18 | 2.73e-16 | 340.0 | 0.97  | 3.39e+13 |
| 899 | J1805-2447 | 18:05:25.9 | -24:47:30   | 0.66 | 5.82e-18 | 22.0  | 9.83  | 3.68e+11 |
| 900 | J1805-2948 | 18:05:42.4 | -29:48:00   | 0.43 | 4.74e-16 | 22.0  | 7.91  | 3.31e+12 |
| 901 | B1804-12   | 18:06:06.7 | -11:54:28.7 | 0.52 | 1.41e-15 | 39.0  | 4.95  | 1.76e+13 |
| 902 | J1806-2125 | 18:06:19.8 | -21:27:55.5 | 0.48 | 1.18e-13 | 55.0  | 3.41  | 1.28e+14 |
| 903 | J1806+2819 | 18:06:25.0 | +28:19:01.1 | 0.02 | 3.75e-20 | 3.0   | 11.63 | 3.78e+9  |
| 904 | J1807+0756 | 18:07:51.2 | +07:56:43.3 | 0.46 | 1.29e-16 | 27.0  | 6.72  | 2.12e+12 |
| 905 | B1804-08   | 18:07:38.0 | -08:47:43.2 | 0.16 | 2.88e-17 | 12.0  | 9.02  | 4.43e+11 |
| 906 | B1804-27   | 18:07:08.4 | -27:15:03.0 | 0.83 | 1.22e-14 | 25.0  | 9.67  | 1.91e+13 |
| 907 | J1808-0813 | 18:08:09.4 | -08:13:01.8 | 0.88 | 1.24e-15 | 38.0  | 6.54  | 9.26e+12 |
| 908 | J1808-1020 | 18:08:45.6 | -10:20:48.3 | 0.60 | 7.72e-16 | 26.0  | 7.90  | 5.8e+12  |
| 909 | J1808-1517 | 18:08:39.0 | -15:17:40   | 0.54 | 2.67e-15 | 18.0  | 10.91 | 6.45e+12 |
| 910 | B1805-20   | 18:08:06.3 | -20:58:08   | 0.92 | 1.71e-14 | 84.5  | 3.04  | 7.57e+13 |
| 911 | J1808-3249 | 18:08:04.4 | -32:49:34   | 0.36 | 7.05e-15 | 18.0  | 8.93  | 1.45e+13 |
| 912 | J1809-0119 | 18:09:51.3 | -01:19:29.0 | 0.74 | 2.29e-15 | 23.0  | 9.97  | 7.63e+12 |
| 913 | J1809-0743 | 18:09:35.9 | -07:43:01.4 | 0.31 | 1.52e-16 | 18.0  | 8.29  | 1.53e+12 |
| 914 | J1809-1429 | 18:09:45.5 | -14:29:25.0 | 0.90 | 5.24e-15 | 25.0  | 10.06 | 1.25e+13 |
| 915 | J1809-1917 | 18:09:43.1 | -19:17:38.1 | 0.08 | 2.55e-14 | 26.0  | 3.46  | 2.44e+13 |
| 916 | B1806-21   | 18:09:14.3 | -21:09:02.9 | 0.70 | 3.82e-15 | 15.0  | 14.93 | 6.43e+12 |
| 917 | J1809-3547 | 18:09:26.9 | -35:47:18   | 0.86 | 1.2e-16  | 190.0 | 1.40  | 1.33e+13 |
| 918 | J1810+0705 | 18:10:47.0 | +07:05:36.3 | 0.31 | 2.42e-16 | 127.0 | 1.55  | 1.19e+13 |
| 919 | J1810-1709 | 18:10:28.2 | -17:09:27   | 1.16 | 3.33e-16 | 309.0 | 1.04  | 3.48e+13 |
| 920 | J1810-1820 | 18:10:55.5 | -18:20:39   | 0.15 | 5.22e-17 | 31.0  | 3.58  | 1.45e+12 |
| 921 | J1810-2005 | 18:10:58.9 | -20:05:08.2 | 0.03 | 1.47e-19 | 11.0  | 5.28  | 2.42e+10 |
| 922 | B1806-53   | 18:10:44.4 | -53:38:07.6 | 0.26 | 3.86e-16 | 22.0  | 6.22  | 2.97e+12 |
| 923 | J1811-0154 | 18:11:19.8 | -01:54:30.9 | 0.92 | 1.61e-15 | 35.0  | 7.29  | 9.73e+12 |
| 924 | J1811-1717 | 18:11:26.5 | -17:17:47   | 0.39 | 1.2e-16  | 59.0  | 2.91  | 4.32e+12 |
| 925 | J1811-1736 | 18:11:55.0 | -17:36:37.7 | 0.10 | 9.01e-19 | 63.0  | 2.72  | 2.69e+11 |
| 926 | J1811-2405 | 18:11:19.8 | -24:05:18.4 | 0.00 | 1.38e-20 | 2.1   | 27.15 | 4.25e+8  |
| 927 | J1811-2439 | 18:11:55.5 | -24:39:53   | 0.42 | 2.97e-16 | 24.0  | 7.15  | 2.86e+12 |
| 928 | J1811-4930 | 18:11:27.1 | -49:30:20.8 | 1.43 | 2.25e-15 | 39.0  | 8.14  | 1.28e+13 |
| 929 | B1810+02   | 18:12:53.1 | +02:26:57.1 | 0.79 | 3.6e-15  | 20.0  | 11.86 | 8.32e+12 |
| 930 | B1809-173  | 18:12:07.2 | -17:18:29.5 | 1.21 | 1.91e-14 | 60.0  | 4.86  | 5.73e+13 |
| 931 | B1809-176  | 18:12:15.8 | -17:33:37.8 | 0.54 | 9.82e-16 | 191.0 | 1.26  | 3.35e+13 |
| 932 | J1812-20   | 18:12:36.5 | -20:58.1    | 1.90 | 2.4e-16  | 392.0 | 1.00  | 3.93e+13 |
| 933 | J1812-2102 | 18:12:20.9 | -21:02:36   | 1.22 | 2.39e-14 | 66.0  | 4.45  | 7.51e+13 |
| 934 | J1812-2526 | 18:12:32.3 | -25:26:38   | 0.32 | 1.77e-16 | 19.0  | 7.88  | 1.74e+12 |
| 935 | J1812-3039 | 18:12:44.9 | -30:39:21   | 0.59 | 6.6e-16  | 24.0  | 8.49  | 4.27e+12 |
| 936 | J1813+1822 | 18:13:38.7 | +18:22:15.0 | 0.34 | 2.1e-17  | 20.0  | 7.73  | 6.33e+11 |
| 937 | J1813-2113 | 18:13:39.8 | -21:13:00.4 | 0.43 | 2.08e-15 | 23.0  | 7.55  | 7.25e+12 |
| 938 | B1811+40   | 18:13:13.2 | +40:13:39.0 | 0.93 | 2.55e-15 | 28.0  | 9.15  | 9.8e+12  |
| 939 | J1814-0521 | 18:14:26.1 | -05:21:37.0 | 1.01 | 8.84e-16 | 43.0  | 6.21  | 8.85e+12 |
| 940 | J1814-0618 | 18:14:41.2 | -06:18:01.7 | 1.38 | 2.92e-16 | 194.0 | 1.65  | 2.23e+13 |
| 941 | J1814-1649 | 18:14:37.3 | -16:49:28   | 0.96 | 6.33e-15 | 58.0  | 4.49  | 3.19e+13 |
| 942 | J1815-1910 | 18:15:03.0 | -19:10:00.4 | 1.25 | 3.63e-14 | 52.0  | 5.70  | 6.86e+13 |
| 943 | J1815+5546 | 18:15:05.7 | +55:46:23.3 | 0.43 | 9.47e-17 | 18.0  | 9.66  | 1.21e+12 |
| 944 | J1816-0755 | 18:16:24.5 | -07:55:22.5 | 0.22 | 6.48e-15 | 9.1   | 13.71 | 5.72e+12 |
| 945 | B1813-17   | 18:16:18.6 | -17:29:02.7 | 0.78 | 7.26e-15 | 37.0  | 6.35  | 2.18e+13 |
| 946 | B1813-26   | 18:16:35.3 | -26:49:53   | 0.59 | 6.65e-17 | 65.5  | 3.17  | 3.64e+12 |
| 947 | J1816+4510 | 18:16:35.9 | +45:10:33.8 | 0.00 | 4.31e-20 | 1.0   | 17.92 | 1.22e+9  |
| 948 | J1816-5643 | 18:16:36.4 | -56:43:42.1 | 0.22 | 1.93e-18 | 22.6  | 5.56  | 2.14e+11 |
| 949 | B1813-36   | 18:17:05.8 | -36:18:04.6 | 0.39 | 2.02e-15 | 17.0  | 9.74  | 5.29e+12 |
| 950 | J1817-3837 | 18:17:00.2 | -38:37:59.7 | 0.38 | 5.8e-16  | 10.0  | 16.62 | 1.67e+12 |
| 951 | J1818-0151 | 18:18:25.7 | -01:51:54.0 | 0.84 | 9.11e-15 | 35.1  | 6.92  | 2.32e+13 |
| 952 | B1815-14   | 18:18:23.7 | -14:22:36.7 | 0.29 | 2.04e-15 | 53.0  | 2.84  | 1.57e+13 |
| 953 | J1819-0925 | 18:19:50.5 | -09:25:49.9 | 0.85 | 3.13e-15 | 33.0  | 7.42  | 1.28e+13 |
| 954 | J1819-1114 | 18:19:28.7 | -11:14:43   | 0.29 | 5.66e-16 | 74.0  | 2.15  | 1.99e+13 |

|      |            |            |             |      |          |       |       |          |
|------|------------|------------|-------------|------|----------|-------|-------|----------|
| 955  | J1819+1305 | 18:19:56.2 | +13:05:15.2 | 1.06 | 3.59e-16 | 82.0  | 3.35  | 1.68e+13 |
| 956  | J1819-1318 | 18:19:43.6 | -13:18:42   | 1.52 | 5.97e-16 | 41.0  | 7.96  | 6.95e+12 |
| 957  | J1819-1510 | 18:19:53.6 | -15:10:20.6 | 0.23 | 7.85e-18 | 30.0  | 4.32  | 5.67e+11 |
| 958  | B1818-04   | 18:20:52.5 | -04:27:37.7 | 0.60 | 6.33e-15 | 19.0  | 10.83 | 1.48e+13 |
| 959  | J1820-0509 | 18:20:22.7 | -05:09:38.5 | 0.34 | 9.32e-16 | 21.0  | 7.37  | 4.42e+12 |
| 960  | B1817-13   | 18:20:19.7 | -13:46:15.3 | 0.92 | 4.5e-15  | 151.0 | 1.76  | 6.73e+13 |
| 961  | B1817-18   | 18:20:39.0 | -18:18:03.3 | 0.31 | 9.36e-17 | 28.0  | 5.33  | 1.86e+12 |
| 962  | J1821+0155 | 18:21:38.8 | +01:55:21.9 | 0.03 | 2.9e-20  | 1.7   | 30.02 | 2.19e+9  |
| 963  | J1821-0256 | 18:21:10.3 | -02:56:38.6 | 0.41 | 3.72e-17 | 25.0  | 6.85  | 1.52e+12 |
| 964  | J1821-1432 | 18:21:39.7 | -14:32:53.2 | 1.92 | 5.37e-15 | 97.0  | 3.79  | 4.92e+13 |
| 965  | J1821+1715 | 18:21:13.5 | +17:15:47.0 | 1.37 | 8.71e-16 | 64.0  | 4.85  | 1.31e+13 |
| 966  | J1821+4147 | 18:21:52.3 | +41:47:02.5 | 1.26 | 1.73e-15 | 44.0  | 6.77  | 1.27e+13 |
| 967  | J1822-0719 | 18:22:28.0 | -07:19:55.0 | 0.50 | 1.9e-17  | 18.5  | 10.16 | 5.59e+11 |
| 968  | J1822-0848 | 18:22:51.8 | -08:48:59.0 | 0.83 | 1.35e-16 | 55.0  | 4.42  | 4.41e+12 |
| 969  | J1822-0902 | 18:22:35.7 | -09:02:59.1 | 0.15 | 1.78e-14 | 7.11  | 14.54 | 6.56e+12 |
| 970  | J1822+1120 | 18:22:14.6 | +11:20:56.2 | 1.79 | 2.35e-15 | 59.0  | 6.00  | 1.98e+13 |
| 971  | B1820-14   | 18:22:54.0 | -14:00:02.4 | 0.21 | 9.07e-16 | 17.0  | 7.29  | 3.52e+12 |
| 972  | B1819-22   | 18:22:58.9 | -22:56:31   | 1.87 | 1.35e-15 | 81.0  | 4.48  | 2.6e+13  |
| 973  | J1822+2617 | 18:22:44.8 | +26:17:26.8 | 0.59 | 7.98e-16 | 13.27 | 15.50 | 2.6e+12  |
| 974  | J1822-4209 | 18:22:11.3 | -42:09:10.9 | 0.46 | 4.59e-16 | 28.0  | 6.42  | 4.14e+12 |
| 975  | J1823-0154 | 18:23:52.1 | -01:54:04.6 | 0.76 | 1.13e-15 | 15.0  | 15.54 | 3.5e+12  |
| 976  | B1821+05   | 18:23:30.9 | +05:50:24.3 | 0.75 | 2.27e-16 | 60.0  | 3.86  | 6.21e+12 |
| 977  | J1823-1126 | 18:23:19.8 | -11:26:04   | 1.85 | 3.65e-14 | 44.0  | 8.19  | 5.83e+13 |
| 978  | B1820-30A  | 18:23:40.4 | -30:21:40.1 | 0.01 | 3.38e-18 | 0.98  | 21.47 | 1.19e+10 |
| 979  | B1820-30B  | 18:23:41.5 | -30:21:40.9 | 0.38 | 2.99e-17 | 14.3  | 11.46 | 5.42e+11 |
| 980  | B1820-31   | 18:23:46.7 | -31:06:49.7 | 0.28 | 2.93e-15 | 8.9   | 16.05 | 3.34e+12 |
| 981  | J1824-0132 | 18:24:55.5 | -01:32:24.0 | 0.22 | 2.82e-17 | 22.4  | 5.68  | 8.12e+11 |
| 982  | B1821-11   | 18:24:29.5 | -11:18:42.6 | 0.44 | 3.55e-15 | 51.0  | 3.50  | 2.63e+13 |
| 983  | J1824-1350 | 18:24:50.1 | -13:50:21.0 | 1.40 | 6.07e-16 | 58.2  | 5.38  | 9.93e+12 |
| 984  | J1824-1423 | 18:24:57.3 | -14:23:05.3 | 0.36 | 3.92e-16 | 28.0  | 5.72  | 3.81e+12 |
| 985  | B1821-19   | 18:24:00.5 | -19:46:03.3 | 0.19 | 5.24e-15 | 3.3   | 37.44 | 1.66e+12 |
| 986  | J1824-2233 | 18:24:10.3 | -22:33:11   | 1.16 | 3.01e-16 | 32.0  | 8.94  | 3.85e+12 |
| 987  | J1824-2328 | 18:24:28.6 | -23:28:17   | 1.51 | 1.74e-15 | 51.0  | 6.38  | 1.47e+13 |
| 988  | B1821-24A  | 18:24:32.0 | -24:52:10.8 | 0.00 | 1.62e-18 | 1.6   | 15.23 | 8.57e+9  |
| 989  | B1822+00   | 18:25:15.3 | +00:04:19.7 | 0.78 | 8.76e-16 | 33.0  | 7.10  | 6.76e+12 |
| 990  | J1825-0319 | 18:25:55.9 | -03:19:57.5 | 0.00 | 6.8e-21  | 0.38  | 54.82 | 2.18e+8  |
| 991  | B1822-09   | 18:25:30.5 | -09:35:21.2 | 0.77 | 5.24e-14 | 47.0  | 4.96  | 7.43e+13 |
| 992  | J1825-1108 | 18:25:18.3 | -11:08:54   | 1.93 | 1.9e-15  | 68.8  | 5.34  | 2.78e+13 |
| 993  | B1822-14   | 18:25:02.9 | -14:46:53.7 | 0.28 | 2.27e-14 | 28.0  | 5.07  | 2.88e+13 |
| 994  | B1823-13   | 18:26:13.1 | -13:34:46.8 | 0.10 | 7.53e-14 | 34.7  | 2.96  | 5.41e+13 |
| 995  | J1826-2415 | 18:26:36.0 | -24:15:54.5 | 0.00 | 1.74e-20 | 1.9   | 12.77 | 1.31e+9  |
| 996  | J1827-0750 | 18:27:02.7 | -07:50:19.2 | 0.27 | 1.54e-15 | 38.0  | 3.74  | 1.22e+13 |
| 997  | B1824-10   | 18:27:05.4 | -09:58:43.1 | 0.25 | 1e-15    | 57.0  | 2.51  | 1.14e+13 |
| 998  | J1828-0611 | 18:28:20.7 | -06:11:51.5 | 0.27 | 1.46e-15 | 17.0  | 8.14  | 4.48e+12 |
| 999  | J1828-1101 | 18:28:18.8 | -11:01:50.8 | 0.07 | 1.48e-14 | 49.0  | 3.66  | 1.64e+13 |
| 1000 | J1828-2119 | 18:28:21.5 | -21:19:56   | 0.51 | 1.27e-15 | 34.0  | 5.62  | 8.35e+12 |
| 1001 | J1829+0000 | 18:29:47.1 | +00:00:08.5 | 0.20 | 5.25e-16 | 21.0  | 5.72  | 3.28e+12 |
| 1002 | J1829-0734 | 18:29:05.3 | -7:34:22    | 0.32 | 4.79e-15 | 19.0  | 7.91  | 9.78e+12 |
| 1003 | B1826-17   | 18:29:43.1 | -17:51:03.9 | 0.31 | 5.55e-15 | 18.0  | 8.20  | 9.26e+12 |
| 1004 | J1829+2456 | 18:29:34.6 | +24:56:18.1 | 0.04 | 5.25e-20 | 1.7   | 33.40 | 2.7e+9   |
| 1005 | J1830-0052 | 18:30:30.7 | -00:52:54.0 | 0.35 | 2.37e-16 | 16.0  | 9.78  | 1.7e+12  |
| 1006 | J1830-0131 | 18:30:19.6 | -01:31:48.1 | 0.15 | 2.11e-15 | 18.0  | 5.87  | 5.61e+12 |
| 1007 | B1828-11   | 18:30:47.5 | -10:59:26.5 | 0.41 | 5.99e-14 | 9.5   | 18.00 | 1.61e+13 |
| 1008 | J1830-1414 | 18:30:00.3 | -14:14:37   | 0.77 | 7.62e-17 | 22.0  | 10.62 | 1.33e+12 |
| 1009 | J1831-0823 | 18:31:36.3 | -08:23:23.9 | 0.61 | 3.09e-16 | 20.0  | 10.40 | 2.44e+12 |
| 1010 | J1831-0952 | 18:31:34.3 | -09:52:01.7 | 0.07 | 8.32e-15 | 14.0  | 5.27  | 8.25e+12 |
| 1011 | J1832+0029 | 18:32:50.7 | +00:29:27   | 0.53 | 1.55e-15 | 15.0  | 12.99 | 4.96e+12 |
| 1012 | J1832-0644 | 18:32:42.6 | -06:44:01.8 | 0.74 | 3.71e-14 | 60.0  | 3.84  | 7.94e+13 |
| 1013 | B1829-08   | 18:32:37.0 | -08:27:03.7 | 0.65 | 6.39e-14 | 23.0  | 9.30  | 4.29e+13 |
| 1014 | J1832-0836 | 18:32:27.5 | -08:36:55.0 | 0.00 | 8.27e-21 | 0.34  | 46.66 | 2.86e+8  |
| 1015 | B1829-10   | 18:32:40.8 | -10:21:32.7 | 0.33 | 4.2e-15  | 24.0  | 6.39  | 1.71e+13 |
| 1016 | J1833-0209 | 18:33:05.4 | -02:09:16.4 | 0.29 | 2.75e-15 | 30.7  | 4.74  | 1.98e+13 |
| 1017 | B1831-03   | 18:33:41.8 | -03:39:04.2 | 0.69 | 4.16e-14 | 19.0  | 11.61 | 2.69e+13 |
| 1018 | B1830-08   | 18:33:40.2 | -08:27:31.6 | 0.09 | 9.18e-15 | 14.0  | 5.77  | 8.91e+12 |
| 1019 | B1828-60   | 18:33:14.8 | -60:23:04   | 1.89 | 2.7e-16  | 80.0  | 4.55  | 9.1e+12  |



|      |             |            |             |      |          |       |       |          |
|------|-------------|------------|-------------|------|----------|-------|-------|----------|
| 1020 | B1831-00    | 18:34:17.2 | -00:10:53.3 | 0.52 | 1.05e-17 | 34.7  | 5.54  | 7.75e+11 |
| 1021 | J1834-0031  | 18:34:51.0 | -00:31:34.3 | 0.33 | 4.49e-16 | 13.0  | 11.77 | 1.91e+12 |
| 1022 | B1831-04    | 18:34:25.6 | -04:26:15.8 | 0.29 | 7.19e-17 | 104.0 | 1.71  | 4.91e+12 |
| 1023 | J1834-0602  | 18:34:37.9 | -6:02:35    | 0.49 | 1.83e-15 | 35.0  | 5.32  | 1.31e+13 |
| 1024 | J1834-0731  | 18:34:15.9 | -07:31:05.9 | 0.51 | 5.82e-14 | 140.0 | 1.53  | 2.68e+14 |
| 1025 | J1834-1202  | 18:34:23.1 | -12:02:26.4 | 0.61 | 6.74e-18 | 75.0  | 2.82  | 1.32e+12 |
| 1026 | J1834-1710  | 18:34:53.4 | -17:10:50   | 0.36 | 4.69e-17 | 21.0  | 7.59  | 9.93e+11 |
| 1027 | J1834-1855  | 18:34:45.9 | -18:55:59   | 1.47 | 1.93e-15 | 71.0  | 4.52  | 2.16e+13 |
| 1028 | J1835-0349  | 18:35:12.9 | -03:49:09.9 | 0.84 | 3.06e-15 | 28.0  | 8.70  | 1.74e+13 |
| 1029 | B1832-06    | 18:35:05.5 | -06:43:06.4 | 0.31 | 4.05e-14 | 60.5  | 2.58  | 7.92e+13 |
| 1030 | J1835-0847  | 18:35:45.7 | -8:47:20    | 0.85 | 4.85e-16 | 108.0 | 2.31  | 1.61e+13 |
| 1031 | J1835-09242 | 18:35:21.8 | -09:24:15.9 | 0.24 | 1.18e-17 | 45.3  | 3.01  | 1.16e+12 |
| 1032 | J1835-0928  | 18:35:22.2 | -9:28:02    | 0.62 | 9.69e-16 | 64.2  | 3.30  | 1.36e+13 |
| 1033 | J1835-0944  | 18:35:46.6 | -09:44:27.2 | 0.15 | 4.38e-15 | 19.0  | 5.46  | 8.49e+12 |
| 1034 | J1835-0946  | 18:35:44.8 | -9:46:38    | 0.38 | 4.32e-17 | 7.2   | 23.24 | 3.28e+11 |
| 1035 | J1835-1020  | 18:35:57.5 | -10:20:04.5 | 0.30 | 5.92e-15 | 11.0  | 13.35 | 5.86e+12 |
| 1036 | J1835-1106  | 18:35:18.4 | -11:06:16.1 | 0.17 | 2.06e-14 | 8.4   | 12.97 | 8.34e+12 |
| 1037 | J1835-1548  | 18:35:50.3 | -15:48:38   | 0.67 | 1.74e-15 | 42.0  | 5.19  | 1.21e+13 |
| 1038 | B1834-04    | 18:36:51.7 | -04:36:37.6 | 0.35 | 1.66e-15 | 18.0  | 8.80  | 5.71e+12 |
| 1039 | B1834-10    | 18:36:53.9 | -10:08:08.3 | 0.56 | 1.18e-14 | 17.0  | 11.75 | 1.28e+13 |
| 1040 | J1836-1324  | 18:36:52.2 | -13:24:33.6 | 0.18 | 1.04e-15 | 16.0  | 7.09  | 3.54e+12 |
| 1041 | J1837-0045  | 18:37:32.1 | -00:45:10.6 | 0.62 | 1.68e-15 | 31.0  | 6.73  | 8.79e+12 |
| 1042 | J1837+0053  | 18:37:28.4 | +00:53:13   | 0.47 | 3.77e-17 | 108.0 | 1.84  | 4.22e+12 |
| 1043 | J1837-0604  | 18:37:43.5 | -6:04:49    | 0.10 | 4.52e-14 | 30.0  | 3.22  | 3.75e+13 |
| 1044 | B1834-06    | 18:37:14.6 | -06:53:02.1 | 1.91 | 7.72e-16 | 182.0 | 2.03  | 3.46e+13 |
| 1045 | J1837-0822  | 18:37:39.6 | -08:22:12.4 | 1.10 | 1.21e-16 | 53.7  | 5.18  | 4.86e+12 |
| 1046 | J1837+1221  | 18:37:07.1 | +12:21:54.0 | 1.96 | 6.2e-15  | 46.0  | 8.08  | 2.51e+13 |
| 1047 | J1837-1837  | 18:37:54.2 | -18:37:08   | 0.62 | 5.5e-15  | 19.0  | 11.01 | 9.77e+12 |
| 1048 | J1838-0107  | 18:38:39.4 | -01:07:48.6 | 0.44 | 5.46e-18 | 45.0  | 3.98  | 7.18e+11 |
| 1049 | J1838-1046  | 18:38:26.4 | -10:46:57   | 1.22 | 3.08e-15 | 34.0  | 8.61  | 1.31e+13 |
| 1050 | J1838+1523  | 18:38:46.7 | +15:23:25.4 | 0.55 | 2.03e-17 | 67.0  | 2.99  | 2.45e+12 |
| 1051 | J1838+1650  | 18:38:43.0 | +16:50:16.0 | 1.90 | 2.68e-15 | 92.0  | 3.98  | 3.29e+13 |
| 1052 | J1839-0223  | 18:39:58.0 | -02:23:09.5 | 1.27 | 4.76e-15 | 67.9  | 4.40  | 3.24e+13 |
| 1053 | J1839-0402  | 18:39:51.0 | -04:02:24.9 | 0.52 | 7.69e-15 | 16.0  | 12.02 | 9.73e+12 |
| 1054 | J1839-0436  | 18:39:00.0 | -04:36:57.5 | 0.15 | 8.1e-16  | 12.0  | 8.63  | 2.35e+12 |
| 1055 | J1839-0627  | 18:39:20.4 | -6:27:34    | 0.48 | 1.32e-16 | 29.0  | 6.39  | 2.3e+12  |
| 1056 | J1839-0643  | 18:39:09.8 | -06:43:45.2 | 0.45 | 3.64e-15 | 74.0  | 2.50  | 2.96e+13 |
| 1057 | J1839-1238  | 18:39:43.7 | -12:38:40.7 | 1.91 | 4.95e-15 | 49.0  | 7.48  | 2.39e+13 |
| 1058 | J1840+0214  | 18:40:34.0 | +02:14:54.7 | 0.80 | 8.29e-15 | 22.0  | 10.79 | 1.39e+13 |
| 1059 | J1840-0445  | 18:40:45.5 | -4:45:08    | 0.42 | 1.13e-14 | 53.0  | 3.32  | 3.81e+13 |
| 1060 | J1840-0559  | 18:40:23.1 | -05:59:16.2 | 0.86 | 9.6e-15  | 45.0  | 5.47  | 3.48e+13 |
| 1061 | J1840-0809  | 18:40:33.3 | -08:09:03.6 | 0.96 | 2.35e-15 | 35.0  | 7.41  | 1.18e+13 |
| 1062 | J1840-0815  | 18:40:13.7 | -08:15:08.8 | 1.10 | 2.43e-15 | 34.0  | 8.17  | 1.16e+13 |
| 1063 | J1840-1207  | 18:40:53.7 | -12:07:32.6 | 0.75 | 3.2e-15  | 21.0  | 11.00 | 8.24e+12 |
| 1064 | B1839+56    | 18:40:44.5 | +56:40:54.8 | 1.65 | 1.49e-15 | 57.5  | 5.93  | 1.54e+13 |
| 1065 | J1841+0130  | 18:41:17.7 | +01:30:16.9 | 0.03 | 8.17e-18 | 11.0  | 5.25  | 1.73e+11 |
| 1066 | J1841-0157  | 18:41:56.2 | -01:57:54.6 | 0.66 | 1.81e-14 | 40.0  | 5.42  | 3.71e+13 |
| 1067 | J1841-0345  | 18:41:38.6 | -03:48:42.6 | 0.20 | 5.79e-14 | 20.0  | 6.07  | 3.29e+13 |
| 1068 | B1838-04    | 18:41:05.6 | -04:25:19.5 | 0.19 | 6.39e-15 | 9.8   | 11.76 | 5.42e+12 |
| 1069 | B1839+09    | 18:41:55.9 | +09:12:07.3 | 0.38 | 1.09e-15 | 14.0  | 11.75 | 3.2e+12  |
| 1070 | J1841-1404  | 18:41:34.3 | -14:04:19   | 1.33 | 6.41e-16 | 122.0 | 2.54  | 2.12e+13 |
| 1071 | J1841-7845  | 18:41:25.9 | -78:45:15   | 0.35 | 1.6e-16  | 41.4  | 3.88  | 3.56e+12 |
| 1072 | J1842-0153  | 18:42:57.8 | -01:53:26.7 | 1.05 | 6.72e-15 | 66.0  | 4.14  | 3.73e+13 |
| 1073 | J1842+0358  | 18:42:17.0 | +03:58:35.3 | 0.23 | 8.11e-16 | 8.0   | 16.19 | 1.58e+12 |
| 1074 | B1839-04    | 18:42:26.4 | -04:00:01.5 | 1.84 | 5.08e-16 | 345.0 | 1.10  | 5.93e+13 |
| 1075 | J1842-0415  | 18:42:11.2 | -04:15:38.2 | 0.53 | 2.19e-14 | 27.0  | 7.15  | 2.76e+13 |
| 1076 | J1842+0638  | 18:42:10.0 | +06:38:15.0 | 0.31 | 7.6e-17  | 20.0  | 7.46  | 1.2e+12  |
| 1077 | J1842-0800  | 18:42:54.9 | -08:00:53.5 | 1.26 | 1.94e-16 | 52.3  | 5.68  | 5.44e+12 |
| 1078 | J1842-0905  | 18:42:22.1 | -09:05:30.0 | 0.34 | 1.05e-14 | 20.0  | 7.82  | 1.42e+13 |
| 1079 | J1842+1332  | 18:42:29.9 | +13:32:01.5 | 0.47 | 2.29e-16 | 146.0 | 1.46  | 1.3e+13  |
| 1080 | J1843-0000  | 18:43:27.9 | -00:00:41.5 | 0.88 | 7.77e-15 | 38.0  | 6.55  | 2.32e+13 |
| 1081 | J1843-0459  | 18:43:27.6 | -04:59:30.4 | 0.75 | 8.54e-16 | 90.0  | 2.61  | 1.78e+13 |
| 1082 | J1843-0510  | 18:43:09.7 | -05:10:04.5 | 0.67 | 3.89e-15 | 36.0  | 6.05  | 1.55e+13 |
| 1083 | J1843-0702  | 18:43:22.4 | -07:02:54.6 | 0.19 | 2.14e-15 | 7.1   | 16.54 | 2.28e+12 |
| 1084 | J1843-1507  | 18:43:33.6 | -15:07:03.0 | 0.58 | 7.2e-15  | 19.0  | 10.70 | 1.12e+13 |

|      |             |            |             |      |          |       |       |          |
|------|-------------|------------|-------------|------|----------|-------|-------|----------|
| 1085 | J1844-0030  | 18:44:41.0 | -00:30:25.8 | 0.64 | 6.08e-15 | 31.0  | 6.86  | 1.67e+13 |
| 1086 | B1842-02    | 18:44:44.9 | -02:44:40.9 | 0.51 | 1.67e-14 | 46.0  | 4.15  | 4.72e+13 |
| 1087 | J1844-0302  | 18:44:06.9 | -03:02:11.2 | 1.20 | 7.81e-15 | 33.3  | 8.73  | 2.41e+13 |
| 1088 | B1841-04    | 18:44:33.4 | -04:33:12.4 | 0.99 | 3.91e-15 | 27.0  | 9.79  | 1.17e+13 |
| 1089 | B1841-05    | 18:44:05.1 | -05:38:34.1 | 0.26 | 9.71e-15 | 23.0  | 5.89  | 1.55e+13 |
| 1090 | B1842+14    | 18:44:54.8 | +14:54:14.1 | 0.38 | 1.87e-15 | 16.0  | 10.20 | 4.79e+12 |
| 1091 | B1842-04    | 18:45:34.7 | -04:34:29.8 | 0.49 | 1.13e-14 | 25.0  | 7.42  | 1.84e+13 |
| 1092 | J1845-0545  | 18:45:38.4 | -05:45:18.2 | 1.09 | 1.34e-14 | 33.0  | 8.40  | 2.65e+13 |
| 1093 | J1845+0623  | 18:45:08.5 | +06:23:57.6 | 1.42 | 5.46e-16 | 26.0  | 12.21 | 4.22e+12 |
| 1094 | J1845-0635  | 18:45:07.4 | -06:35:23.4 | 0.34 | 4.49e-15 | 25.0  | 6.23  | 1.15e+13 |
| 1095 | J1845-0743  | 18:45:57.1 | -07:43:38.5 | 0.10 | 3.67e-16 | 9.3   | 9.35  | 1.22e+12 |
| 1096 | J1845-0826  | 18:45:05.6 | -08:26:39.7 | 0.63 | 9.35e-15 | 31.0  | 6.83  | 2.73e+13 |
| 1097 | J1845-1114  | 18:45:45.7 | -11:14:11.0 | 0.21 | 2.01e-15 | 5.6   | 21.97 | 1.74e+12 |
| 1098 | J1846+0051  | 18:46:43.8 | +00:51:39.0 | 0.43 | 1.12e-14 | 24.0  | 7.31  | 1.75e+13 |
| 1099 | J1846-0749  | 18:46:19.7 | -07:49:21.4 | 0.35 | 1.26e-15 | 17.0  | 9.27  | 4.17e+12 |
| 1100 | J1846-07492 | 18:46:07.9 | -07:49:13.2 | 0.86 | 5.19e-15 | 36.0  | 6.84  | 1.8e+13  |
| 1101 | B1844-04    | 18:47:22.8 | -04:02:14.4 | 0.60 | 5.17e-14 | 29.0  | 7.08  | 4.56e+13 |
| 1102 | J1847-0427  | 18:47:18.8 | -4:27:59    | 0.26 | 5.9e-18  | 48.4  | 2.94  | 7.7e+11  |
| 1103 | J1847-0438  | 18:47:37.9 | -04:38:15.3 | 0.96 | 1.09e-14 | 21.0  | 12.41 | 1.52e+13 |
| 1104 | J1847-0605  | 18:47:21.0 | -06:05:14.1 | 0.78 | 4.65e-15 | 37.0  | 6.33  | 1.75e+13 |
| 1105 | J1848-0023  | 18:48:37.8 | -0:23:17    | 0.54 | 1.61e-15 | 24.0  | 8.12  | 6.67e+12 |
| 1106 | B1845-01    | 18:48:23.5 | -01:23:58.3 | 0.66 | 5.25e-15 | 37.0  | 5.83  | 1.85e+13 |
| 1107 | J1848-0601  | 18:48:20.3 | -06:01:07.7 | 0.23 | 2.87e-16 | 22.0  | 5.79  | 2.55e+12 |
| 1108 | J1848+0647  | 18:48:56.0 | +06:47:31.7 | 0.51 | 8.75e-15 | 27.0  | 7.01  | 1.75e+13 |
| 1109 | J1848+0826  | 18:48:43.7 | +08:26:35.9 | 0.33 | 2.72e-16 | 37.0  | 4.18  | 4.15e+12 |
| 1110 | J1848-1150  | 18:48:11.8 | -11:50:09.2 | 1.31 | 1.43e-15 | 42.0  | 7.23  | 1.1e+13  |
| 1111 | J1848-1414  | 18:48:39.1 | -14:14:17   | 0.30 | 1.41e-17 | 30.0  | 4.89  | 7.69e+11 |
| 1112 | J1849-0317  | 18:49:57.8 | -3:17:31    | 0.67 | 2.2e-14  | 35.0  | 6.21  | 3.59e+13 |
| 1113 | J1849+0409  | 18:49:03.4 | +04:09:42.3 | 0.76 | 2.16e-14 | 16.0  | 14.56 | 1.63e+13 |
| 1114 | J1849-0614  | 18:49:45.1 | -06:14:31.5 | 0.95 | 5.39e-14 | 30.0  | 8.64  | 4.83e+13 |
| 1115 | B1846-06    | 18:49:06.4 | -06:37:06.9 | 1.45 | 4.62e-14 | 26.0  | 12.34 | 3.88e+13 |
| 1116 | J1849+2423  | 18:49:34.6 | +24:23:45.9 | 0.28 | 1.53e-16 | 27.0  | 5.22  | 2.28e+12 |
| 1117 | J1850+0026  | 18:50:45.1 | +00:26:25.6 | 1.08 | 3.59e-16 | 98.0  | 2.84  | 1.27e+13 |
| 1118 | J1850-0026  | 18:50:14.7 | -00:26:11.6 | 0.17 | 3.91e-14 | 57.0  | 2.31  | 6.4e+13  |
| 1119 | B1848+13    | 18:50:35.4 | +13:35:58.3 | 0.35 | 1.49e-15 | 12.0  | 13.07 | 3.21e+12 |
| 1120 | J1851-0029  | 18:51:55.0 | -00:29:58.1 | 0.52 | 4.74e-15 | 32.0  | 5.99  | 1.52e+13 |
| 1121 | J1851-0053  | 18:51:03.1 | -00:53:07.3 | 1.41 | 8.74e-16 | 33.0  | 9.55  | 6.77e+12 |
| 1122 | J1851-0114  | 18:51:16.4 | -01:14:13.4 | 0.95 | 2.48e-15 | 44.0  | 5.89  | 1.52e+13 |
| 1123 | J1851-0633  | 18:51:41.6 | -06:33:48.4 | 1.92 | 2.4e-15  | 55.0  | 6.68  | 1.87e+13 |
| 1124 | B1848+12    | 18:51:13.2 | +12:59:35.2 | 1.21 | 1.15e-14 | 20.0  | 14.66 | 1.49e+13 |
| 1125 | J1852-0118  | 18:52:17.1 | -01:18:14.8 | 0.45 | 1.76e-15 | 48.0  | 3.77  | 1.37e+13 |
| 1126 | J1852-0127  | 18:52:03.6 | -01:27:23.4 | 0.43 | 5.15e-15 | 82.0  | 2.24  | 3.85e+13 |
| 1127 | J1852-0635  | 18:52:57.4 | -06:36:00.4 | 0.52 | 1.46e-14 | 113.0 | 1.83  | 8.77e+13 |
| 1128 | J1852-2610  | 18:52:59.4 | -26:10:12.7 | 0.34 | 8.77e-17 | 28.0  | 5.54  | 1.8e+12  |
| 1129 | J1853-0004  | 18:53:23.0 | -00:04:33.4 | 0.10 | 5.57e-15 | 15.0  | 5.82  | 7.5e+12  |
| 1130 | J1853+0011  | 18:53:29.9 | +00:11:30.6 | 0.40 | 3.35e-14 | 20.7  | 8.11  | 2.62e+13 |
| 1131 | J1853+0505  | 18:53:04.3 | +05:05:26.1 | 0.91 | 1.28e-15 | 195.0 | 1.39  | 4.48e+13 |
| 1132 | J1853+0545  | 18:53:58.4 | +05:45:55.2 | 0.13 | 6.12e-16 | 26.0  | 3.88  | 4.16e+12 |
| 1133 | J1853+1303  | 18:53:57.3 | +13:03:44.0 | 0.00 | 8.72e-21 | 2.19  | 13.16 | 8.39e+8  |
| 1134 | J1854-0524  | 18:54:55.3 | -05:24:23.1 | 0.54 | 1.2e-15  | 23.3  | 8.41  | 5.59e+12 |
| 1135 | B1851-14    | 18:54:44.2 | -14:21:26.4 | 1.15 | 4.16e-15 | 47.0  | 6.04  | 2.99e+13 |
| 1136 | J1855+0307  | 18:55:26.6 | +03:07:20.2 | 0.85 | 1.81e-14 | 26.0  | 9.39  | 2.43e+13 |
| 1137 | J1855-0941  | 18:55:15.6 | -9:41:02    | 0.35 | 2.4e-16  | 45.0  | 3.55  | 4.71e+12 |
| 1138 | J1856+0102  | 18:56:28.5 | +01:02:10.6 | 0.62 | 1.22e-15 | 27.55 | 7.59  | 6.66e+12 |
| 1139 | B1853+01    | 18:56:10.6 | +01:13:21.3 | 0.27 | 2.08e-13 | 6.8   | 20.54 | 2.15e+13 |
| 1140 | J1856-0526  | 18:56:21.9 | -05:26:56.8 | 0.37 | 1.7e-15  | 40.0  | 4.10  | 1.12e+13 |
| 1141 | B1854+00    | 18:57:00.8 | +00:57:16.8 | 0.36 | 5.46e-17 | 36.0  | 4.46  | 1.82e+12 |
| 1142 | J1857+0143  | 18:57:33.0 | +01:43:47.0 | 0.14 | 3.12e-14 | 43.42 | 2.68  | 4.52e+13 |
| 1143 | B1855+02    | 18:57:43.6 | +02:12:41.1 | 0.42 | 4.03e-14 | 24.0  | 7.15  | 3.33e+13 |
| 1144 | J1857+0526  | 18:57:15.8 | +05:26:28.7 | 0.35 | 6.93e-15 | 30.0  | 5.28  | 1.71e+13 |
| 1145 | B1855+09    | 18:57:36.3 | +09:43:17.1 | 0.01 | 1.78e-20 | 3.03  | 11.65 | 1.55e+9  |
| 1146 | J1859+1526  | 18:59:44.3 | +15:26:11.0 | 0.93 | 3.93e-15 | 32.0  | 8.02  | 1.39e+13 |
| 1147 | J1859+7654  | 18:59:36.0 | +76:54:55.6 | 1.39 | 5.05e-17 | 51.0  | 6.14  | 2.51e+12 |
| 1148 | J1900-0051  | 19:00:46.6 | -00:51:08.4 | 0.39 | 1.42e-16 | 14.0  | 11.81 | 1.16e+12 |
| 1149 | J1900-0134  | 19:00:26.1 | -01:34:38.2 | 1.83 | 3.05e-14 | 57.5  | 6.24  | 6.96e+13 |

|      |             |            |             |      |          |       |       |          |
|------|-------------|------------|-------------|------|----------|-------|-------|----------|
| 1150 | J1900+0634  | 19:00:28.0 | +06:34:20.9 | 0.39 | 5.13e-15 | 20.43 | 8.13  | 1.11e+13 |
| 1151 | J1900-0933  | 19:00:31.1 | -09:33:48.1 | 1.42 | 2.26e-16 | 249.0 | 1.33  | 2.47e+13 |
| 1152 | B1857-26    | 19:00:47.5 | -26:00:43.8 | 0.61 | 2.05e-16 | 65.0  | 3.24  | 6.34e+12 |
| 1153 | B1851-79    | 19:00:24.4 | -79:51:48.2 | 1.28 | 1.86e-15 | 85.0  | 3.54  | 2.53e+13 |
| 1154 | B1859+01    | 19:01:34.2 | +01:56:38.2 | 0.29 | 2.36e-15 | 14.0  | 10.22 | 4.7e+12  |
| 1155 | J1901-0312  | 19:01:15.6 | -03:12:29.5 | 0.36 | 2.29e-15 | 48.0  | 3.38  | 1.55e+13 |
| 1156 | J1901-0315  | 19:01:16.3 | -03:15:14.3 | 0.80 | 2.57e-15 | 20.0  | 11.92 | 7.33e+12 |
| 1157 | B1859+03    | 19:01:31.7 | +03:31:05.9 | 0.66 | 7.46e-15 | 35.0  | 6.15  | 2.89e+13 |
| 1158 | B1859+07    | 19:01:38.9 | +07:16:34.8 | 0.64 | 2.29e-15 | 40.0  | 5.34  | 1.32e+13 |
| 1159 | J1901-0906  | 19:01:53.0 | -09:06:11.1 | 1.78 | 1.64e-15 | 56.0  | 6.32  | 1.57e+13 |
| 1160 | J1901+1306  | 19:01:48.7 | +13:06:48.3 | 1.83 | 1.31e-16 | 66.0  | 5.43  | 5.23e+12 |
| 1161 | J1901-1740  | 19:01:18.0 | -17:40:00   | 1.96 | 8.23e-16 | 120.0 | 3.10  | 2.38e+13 |
| 1162 | B1900+05    | 19:02:42.6 | +05:56:25.9 | 0.75 | 1.29e-14 | 28.0  | 8.19  | 2.2e+13  |
| 1163 | B1900+06    | 19:02:50.2 | +06:16:33.4 | 0.67 | 7.71e-15 | 13.0  | 16.92 | 7.92e+12 |
| 1164 | J1902+0723  | 19:02:13.5 | +07:23:51   | 0.49 | 2.1e-16  | 56.0  | 3.37  | 5.51e+12 |
| 1165 | J1902-1036  | 19:02:42.3 | -10:36:13.0 | 0.79 | 7.54e-15 | 19.0  | 12.44 | 1.14e+13 |
| 1166 | B1900+01    | 19:03:29.9 | +01:35:38.5 | 0.73 | 4.03e-15 | 19.0  | 11.97 | 8.37e+12 |
| 1167 | J1903-0258  | 19:03:30.3 | -02:58:15.6 | 0.30 | 6.79e-16 | 34.0  | 4.36  | 6.24e+12 |
| 1168 | B1900-06    | 19:03:37.9 | -06:32:21.5 | 0.43 | 3.38e-15 | 16.0  | 10.94 | 6.44e+12 |
| 1169 | J1903-0848  | 19:03:11.2 | -08:48:57.4 | 0.89 | 1.33e-15 | 36.0  | 6.94  | 9.92e+12 |
| 1170 | J1903+2225  | 19:03:52.9 | +22:25:12.3 | 0.65 | 4.45e-16 | 26.0  | 8.24  | 3.8e+12  |
| 1171 | J1904+0004  | 19:04:12.7 | +00:04:05.2 | 0.14 | 1.18e-16 | 15.0  | 6.72  | 1.11e+12 |
| 1172 | J1904-0150  | 19:04:55.5 | -01:50:32.5 | 0.38 | 8.9e-16  | 13.0  | 12.64 | 2.69e+12 |
| 1173 | B1901+10    | 19:04:02.4 | +10:11:34.6 | 1.86 | 2.76e-16 | 172.0 | 2.12  | 1.96e+13 |
| 1174 | J1904-1224  | 19:04:33.2 | -12:24:01.3 | 0.75 | 7.42e-16 | 25.0  | 9.21  | 4.72e+12 |
| 1175 | J1904-1629  | 19:04:51.3 | -16:29:19   | 1.54 | 3.19e-15 | 30.8  | 10.71 | 1.21e+13 |
| 1176 | B1902-01    | 19:05:27.7 | -00:56:40.8 | 0.64 | 3.06e-15 | 8.8   | 24.84 | 3.38e+12 |
| 1177 | J1905+0600  | 19:05:04.3 | +06:00:59.9 | 0.44 | 1.11e-15 | 35.0  | 5.07  | 8.14e+12 |
| 1178 | J1905+0616  | 19:05:06.8 | +06:16:16.7 | 0.99 | 1.35e-13 | 21.0  | 12.62 | 5.35e+13 |
| 1179 | B1903+07    | 19:05:53.6 | +07:09:19.4 | 0.65 | 4.94e-15 | 63.0  | 3.43  | 3.27e+13 |
| 1180 | B1904+06    | 19:06:35.2 | +06:41:02.9 | 0.27 | 2.14e-15 | 27.0  | 5.15  | 8.53e+12 |
| 1181 | J1906+0649  | 19:06:11.9 | +06:49:48.1 | 1.29 | 1.52e-16 | 60.0  | 5.02  | 5.12e+12 |
| 1182 | J1906+1854  | 19:06:44.7 | +18:54:08.5 | 1.02 | 2.05e-16 | 93.0  | 2.91  | 9.12e+12 |
| 1183 | J1907+0249  | 19:07:42.0 | +02:49:41   | 0.35 | 1.14e-15 | 32.04 | 4.96  | 7.41e+12 |
| 1184 | J1907+0631  | 19:07:03.8 | +06:31:18.9 | 0.32 | 4.52e-13 | 38.56 | 3.99  | 1.76e+14 |
| 1185 | J1907+0731  | 19:07:54.7 | +07:31:21.9 | 0.36 | 1.84e-14 | 17.0  | 9.44  | 1.6e+13  |
| 1186 | J1907+0740  | 19:07:44.1 | +07:40:22.6 | 0.57 | 6.71e-16 | 21.0  | 9.60  | 3.77e+12 |
| 1187 | J1907+0918  | 19:07:22.4 | +09:18:30.7 | 0.23 | 9.43e-14 | 4.2   | 31.47 | 8.95e+12 |
| 1188 | J1907+1149  | 19:07:37.7 | +11:49:37.1 | 1.42 | 1.6e-13  | 28.0  | 11.32 | 7.77e+13 |
| 1189 | B1904+12    | 19:07:10.7 | +12:47:35.9 | 0.83 | 1.95e-15 | 33.0  | 7.32  | 1.92e+13 |
| 1190 | B1905+39    | 19:07:34.6 | +40:02:05.7 | 1.24 | 5.41e-16 | 72.5  | 4.07  | 1.16e+13 |
| 1191 | J1908+0457  | 19:08:16.1 | +04:57:41   | 0.85 | 9.8e-16  | 59.0  | 4.15  | 1.27e+13 |
| 1192 | J1908+0500  | 19:08:05.1 | +05:00:54.4 | 0.29 | 2.59e-15 | 5.4   | 27.43 | 1.91e+12 |
| 1193 | J1908+0734  | 19:08:17.0 | +07:34:14.3 | 0.21 | 8.25e-16 | 18.0  | 6.86  | 3.55e+12 |
| 1194 | J1908+0909  | 19:08:07.4 | +09:09:12.4 | 0.34 | 3.49e-14 | 18.0  | 8.58  | 2.32e+13 |
| 1195 | B1906+09    | 19:08:58.7 | +09:16:14   | 0.83 | 9.8e-17  | 94.0  | 2.62  | 6.33e+12 |
| 1196 | J1908+2351  | 19:08:31.9 | +23:51:41.9 | 0.38 | 1.7e-17  | 14.0  | 11.70 | 4.0e+11  |
| 1197 | B1907+00    | 19:09:35.2 | +00:07:57.7 | 1.02 | 5.52e-15 | 21.0  | 12.79 | 1.83e+13 |
| 1198 | B1907+02    | 19:09:38.3 | +02:54:50.6 | 0.99 | 5.53e-15 | 33.0  | 8.00  | 1.7e+13  |
| 1199 | J1909+0749  | 19:09:08.2 | +07:49:32   | 0.24 | 1.52e-13 | 10.67 | 12.18 | 2.88e+13 |
| 1200 | B1907+10    | 19:09:48.6 | +11:02:03.0 | 0.28 | 2.64e-15 | 11.0  | 12.92 | 3.92e+12 |
| 1201 | J1909+1450  | 19:09:26.9 | +14:50:58   | 1.00 | 2.19e-16 | 85.0  | 3.14  | 8.63e+12 |
| 1202 | J1909+1859  | 19:09:18.6 | +18:59:10.7 | 0.54 | 9.7e-17  | 28.0  | 6.99  | 1.91e+12 |
| 1203 | J1910-0112  | 19:10:15.7 | -1:12:06    | 1.36 | 1.78e-16 | 89.0  | 3.49  | 8.19e+12 |
| 1204 | J1910+0225  | 19:10:10.3 | +02:25:23.6 | 0.34 | 2.62e-16 | 30.0  | 5.19  | 3.33e+12 |
| 1205 | B1907-03    | 19:10:29.6 | -03:09:54.1 | 0.50 | 2.19e-15 | 25.0  | 7.55  | 8.91e+12 |
| 1206 | J1910+0728  | 19:10:22.0 | +07:28:37.0 | 0.33 | 8.31e-15 | 20.0  | 7.60  | 1.26e+13 |
| 1207 | B1907+12    | 19:10:13.5 | +12:31:40.2 | 1.44 | 8.23e-15 | 42.0  | 7.58  | 2.64e+13 |
| 1208 | J1910+1256  | 19:10:09.7 | +12:56:25.4 | 0.00 | 9.68e-21 | 0.43  | 49.99 | 2.9e+8   |
| 1209 | J1910-5959A | 19:11:42.7 | -59:58:26.9 | 0.00 | 2.95e-21 | 0.6   | 27.66 | 2.14e+8  |
| 1210 | J1910-5959C | 19:11:05.5 | -60:00:59.7 | 0.01 | 2.16e-21 | 2.8   | 11.55 | 5.4e+8   |
| 1211 | J1910-5959D | 19:10:52.4 | -59:59:05.4 | 0.01 | 9.64e-19 | 1.1   | 24.08 | 7.32e+9  |
| 1212 | J1911-1114  | 19:11:49.2 | -11:14:22.4 | 0.00 | 1.39e-20 | 0.45  | 39.24 | 3.59e+8  |
| 1213 | J1911+1347  | 19:11:55.2 | +13:47:34.3 | 0.00 | 1.69e-20 | 0.44  | 46.31 | 3.91e+8  |
| 1214 | J1911+1758  | 19:11:55.3 | +17:58:45.7 | 0.46 | 1.31e-17 | 20.0  | 9.02  | 5.11e+11 |

|      |            |            |             |      |          |       |       |          |
|------|------------|------------|-------------|------|----------|-------|-------|----------|
| 1215 | B1910+10   | 19:12:46.3 | +10:36:41.6 | 0.41 | 1.58e-14 | 30.0  | 5.69  | 2.6e+13  |
| 1216 | J1912+2525 | 19:12:18.6 | +25:25:02.1 | 0.62 | 2.25e-16 | 16.0  | 13.14 | 1.66e+12 |
| 1217 | B1911-04   | 19:13:54.1 | -04:40:47.6 | 0.83 | 4.07e-15 | 18.0  | 13.46 | 7.97e+12 |
| 1218 | J1913+0446 | 19:13:50.8 | +04:46:06   | 1.62 | 2.79e-13 | 60.0  | 5.62  | 2.2e+14  |
| 1219 | J1913+0904 | 19:13:21.0 | +09:04:45.4 | 0.16 | 1.76e-14 | 6.0   | 18.12 | 5.52e+12 |
| 1220 | B1911+09   | 19:13:52.7 | +09:36:41.8 | 1.24 | 4.32e-16 | 51.0  | 5.80  | 7.34e+12 |
| 1221 | J1913+1000 | 19:13:03.5 | +10:00:02.4 | 0.84 | 1.67e-14 | 62.0  | 3.93  | 5.51e+13 |
| 1222 | J1913+1011 | 19:13:20.3 | +10:11:22.9 | 0.04 | 3.37e-15 | 5.0   | 10.39 | 1.95e+12 |
| 1223 | J1913+1145 | 19:13:43.8 | +11:45:33.1 | 0.31 | 5.02e-15 | 28.0  | 5.30  | 1.36e+13 |
| 1224 | B1911+13   | 19:13:24.3 | +14:00:52.5 | 0.52 | 8.04e-16 | 20.0  | 9.60  | 3.93e+12 |
| 1225 | J1913+3732 | 19:13:27.8 | +37:32:12.3 | 0.85 | 1.38e-15 | 30.0  | 8.16  | 7.72e+12 |
| 1226 | J1914+0219 | 19:14:23.7 | +02:19:47.8 | 0.46 | 1.02e-15 | 22.0  | 8.18  | 4.86e+12 |
| 1227 | J1914+0631 | 19:14:17.2 | +06:31:56.3 | 0.69 | 3.32e-17 | 26.67 | 8.30  | 1.65e+12 |
| 1228 | B1911+11   | 19:14:10.1 | +11:22:03.7 | 0.60 | 6.56e-16 | 23.0  | 8.96  | 4.81e+12 |
| 1229 | J1915+0227 | 19:15:02.1 | +02:27:47.7 | 0.32 | 2.99e-16 | 28.0  | 5.39  | 3.32e+12 |
| 1230 | J1915+0738 | 19:15:24.8 | +07:38:31.4 | 1.54 | 3.31e-15 | 20.0  | 16.63 | 7.99e+12 |
| 1231 | J1915+0838 | 19:15:13.8 | +08:38:59.7 | 0.34 | 1.57e-15 | 25.0  | 6.25  | 6.82e+12 |
| 1232 | B1913+10   | 19:15:29.9 | +10:09:43.3 | 0.40 | 1.53e-14 | 9.5   | 17.99 | 8.15e+12 |
| 1233 | J1915+1410 | 19:15:35.4 | +14:10:51.5 | 0.30 | 4.89e-17 | 24.0  | 6.08  | 1.15e+12 |
| 1234 | B1913+16   | 19:15:27.9 | +16:06:27.3 | 0.06 | 8.62e-18 | 10.0  | 6.74  | 1.94e+11 |
| 1235 | B1913+167  | 19:15:19.1 | +16:47:08.5 | 1.62 | 4.05e-16 | 47.0  | 7.17  | 6.56e+12 |
| 1236 | J1916+0748 | 19:16:51.5 | +07:48:00   | 0.54 | 1.07e-14 | 230.0 | 1.16  | 1.2e+14  |
| 1237 | J1916+0844 | 19:16:19.0 | +08:44:07.0 | 0.44 | 2.9e-15  | 29.0  | 6.09  | 1.77e+13 |
| 1238 | B1914+09   | 19:16:32.3 | +09:51:25.9 | 0.27 | 2.52e-15 | 12.0  | 11.55 | 4.17e+12 |
| 1239 | B1913+105  | 19:16:11.7 | +10:30:53.4 | 0.63 | 3.4e-17  | 39.0  | 5.41  | 1.57e+12 |
| 1240 | B1914+13   | 19:16:58.6 | +13:12:50.0 | 0.28 | 3.66e-15 | 9.6   | 14.79 | 4.25e+12 |
| 1241 | J1916-2939 | 19:16:32.7 | -29:39:27.8 | 1.25 | 1.24e-15 | 61.0  | 4.86  | 1.49e+13 |
| 1242 | J1916+3224 | 19:16:03.4 | +32:24:39.7 | 1.14 | 3.47e-15 | 46.6  | 6.07  | 1.9e+13  |
| 1243 | B1915+13   | 19:17:39.7 | +13:53:57.0 | 0.19 | 7.2e-15  | 8.4   | 14.05 | 4.93e+12 |
| 1244 | B1915+22   | 19:17:44.2 | +22:22:48.8 | 0.43 | 2.86e-15 | 38.0  | 4.60  | 1.39e+13 |
| 1245 | J1918-0642 | 19:18:48.0 | -06:42:34.9 | 0.01 | 2.57e-20 | 2.1   | 12.59 | 2.58e+9  |
| 1246 | J1918-1052 | 19:18:48.2 | -10:52:46.3 | 0.80 | 8.65e-16 | 20.0  | 11.90 | 4.8e+12  |
| 1247 | B1916+14   | 19:18:23.6 | +14:45:06.0 | 1.18 | 2.12e-13 | 27.0  | 10.70 | 8.63e+13 |
| 1248 | J1918+1541 | 19:18:07.7 | +15:41:15.2 | 0.37 | 2.54e-15 | 25.34 | 6.41  | 8.8e+12  |
| 1249 | B1917+00   | 19:19:50.6 | +00:21:39.7 | 1.27 | 7.67e-15 | 36.0  | 8.31  | 2.19e+13 |
| 1250 | J1919+0134 | 19:19:43.6 | +01:34:56.5 | 1.60 | 5.89e-16 | 80.0  | 4.20  | 1.34e+13 |
| 1251 | J1919+2621 | 19:19:41.0 | +26:21:29.4 | 0.65 | 5.46e-16 | 18.6  | 11.55 | 3.14e+12 |
| 1252 | J1920-0950 | 19:20:55.9 | -09:50:01.0 | 1.04 | 3.93e-16 | 60.0  | 4.51  | 8.21e+12 |
| 1253 | B1918+26   | 19:20:38.3 | +26:50:38.4 | 0.79 | 3.44e-17 | 28.1  | 8.38  | 1.14e+12 |
| 1254 | J1921+0812 | 19:21:47.7 | +08:12:51.8 | 0.21 | 5.36e-15 | 3.5   | 37.20 | 1.78e+12 |
| 1255 | B1919+14   | 19:21:24.1 | +14:19:17.1 | 0.62 | 5.6e-15  | 40.0  | 5.23  | 2.64e+13 |
| 1256 | B1918+19   | 19:21:03.7 | +19:48:44.7 | 0.82 | 8.96e-16 | 134.0 | 1.87  | 2.66e+13 |
| 1257 | B1919+20   | 19:21:51.5 | +20:03:20.8 | 0.76 | 5e-17    | 47.0  | 4.94  | 2.29e+12 |
| 1258 | B1919+21   | 19:21:44.8 | +21:53:02.2 | 1.34 | 1.35e-15 | 43.0  | 7.13  | 1.95e+13 |
| 1259 | J1922+1733 | 19:22:53.2 | +17:33:23.4 | 0.24 | 1.34e-14 | 12.0  | 10.80 | 9.61e+12 |
| 1260 | B1920+20   | 19:22:08.0 | +20:17:57.3 | 1.17 | 6.49e-16 | 80.0  | 3.60  | 1.4e+13  |
| 1261 | B1920+21   | 19:22:53.5 | +21:10:41.9 | 1.08 | 8.18e-15 | 32.7  | 8.43  | 2.51e+13 |
| 1262 | B1921+17   | 19:23:07.8 | +17:06:09.4 | 0.55 | 4.3e-17  | 28.0  | 7.02  | 1.27e+12 |
| 1263 | J1923+2515 | 19:23:22.4 | +25:15:40.5 | 0.00 | 9.56e-21 | 0.67  | 26.48 | 4.32e+8  |
| 1264 | J1923+4243 | 19:23:15.2 | +42:43:18.6 | 0.60 | 2.53e-15 | 27.0  | 7.59  | 9.4e+12  |
| 1265 | B1922+20   | 19:24:40   | +20:40:03   | 0.24 | 2.09e-15 | 28.0  | 4.71  | 8.69e+12 |
| 1266 | B1923+04   | 19:26:24.4 | +04:31:31.5 | 1.07 | 2.46e-15 | 27.0  | 10.20 | 9.29e+12 |
| 1267 | J1926-0652 | 19:26:37.0 | -06:52:42.7 | 1.61 | 3.91e-16 | 247.0 | 1.41  | 3.26e+13 |
| 1268 | B1924+14   | 19:26:57.2 | +14:34:55.3 | 1.32 | 2.19e-16 | 149.0 | 2.08  | 1.5e+13  |
| 1269 | B1924+16   | 19:26:45.3 | +16:48:32.7 | 0.58 | 1.8e-14  | 19.0  | 10.66 | 1.77e+13 |
| 1270 | B1924+19   | 19:26:22.8 | +19:28:11.7 | 1.35 | 1.43e-15 | 88.0  | 3.51  | 2.29e+13 |
| 1271 | J1927+0911 | 19:27:25.6 | +09:11:05.7 | 0.29 | 6.35e-17 | 7.4   | 19.63 | 4.9e+11  |
| 1272 | B1925+18   | 19:27:10.4 | +18:52:08.5 | 0.48 | 1.16e-16 | 28.0  | 6.60  | 2.83e+12 |
| 1273 | B1925+188  | 19:27:24.9 | +18:56:36.8 | 0.30 | 2.24e-15 | 43.0  | 3.47  | 1.37e+13 |
| 1274 | B1925+22   | 19:27:08.0 | +22:34:57.3 | 1.43 | 7.71e-16 | 84.0  | 3.78  | 1.61e+13 |
| 1275 | J1928+1746 | 19:28:42.5 | +17:46:29.6 | 0.07 | 1.32e-14 | 10.88 | 6.65  | 8.33e+12 |
| 1276 | J1928+1923 | 19:28:05.1 | +19:23:31.3 | 0.82 | 6.35e-15 | 96.0  | 2.54  | 5.19e+13 |
| 1277 | B1926+18   | 19:29:16.7 | +18:44:59.5 | 1.22 | 2.36e-15 | 49.0  | 5.98  | 1.65e+13 |
| 1278 | J1929+1955 | 19:29:17.5 | +19:55:07.9 | 0.26 | 2.56e-15 | 16.0  | 8.46  | 5.59e+12 |
| 1279 | J1929+2121 | 19:29:04.2 | +21:21:22.6 | 0.72 | 2.14e-15 | 16.0  | 14.19 | 5.14e+12 |



|      |            |            |             |      |          |        |       |          |
|------|------------|------------|-------------|------|----------|--------|-------|----------|
| 1280 | J1929+3817 | 19:29:07.0 | +38:17:57.5 | 0.81 | 6.1e-16  | 85.0   | 2.85  | 1.43e+13 |
| 1281 | B1927+13   | 19:30:00.9 | +13:16:11.1 | 0.76 | 3.66e-15 | 21.0   | 11.04 | 8.81e+12 |
| 1282 | J1930-1852 | 19:30:29.7 | -18:51:46.2 | 0.19 | 1.8e-17  | 9.1    | 12.65 | 2.67e+11 |
| 1283 | J1931-0144 | 19:31:32.0 | -01:44:22.5 | 0.59 | 2.93e-17 | 40.5   | 5.07  | 1.51e+12 |
| 1284 | B1929+15   | 19:31:55.7 | +15:36:57.5 | 0.31 | 5.01e-15 | 27.0   | 5.56  | 1.31e+13 |
| 1285 | J1931+1952 | 19:31:55.8 | +19:52:11.5 | 0.50 | 1.01e-16 | 14.0   | 13.49 | 9.76e+11 |
| 1286 | B1929+10   | 19:32:14.0 | +10:59:33.3 | 0.23 | 1.16e-15 | 12.0   | 10.58 | 2.83e+12 |
| 1287 | B1929+20   | 19:32:08.0 | +20:20:46.4 | 0.27 | 4.22e-15 | 40.0   | 3.55  | 1.74e+13 |
| 1288 | B1930+22   | 19:32:22.7 | +22:20:51.5 | 0.14 | 5.76e-14 | 4.5    | 22.95 | 7.49e+12 |
| 1289 | J1932-3655 | 19:32:06.1 | -36:55:01.7 | 0.57 | 2.86e-16 | 21.0   | 9.57  | 2.46e+12 |
| 1290 | J1933+0758 | 19:33:19.4 | +07:58:07.0 | 0.44 | 2.18e-16 | 14.6   | 12.07 | 1.49e+12 |
| 1291 | B1930+13   | 19:33:22.5 | +13:04:49.9 | 0.93 | 3.18e-16 | 31.0   | 8.25  | 3.83e+12 |
| 1292 | B1931+24   | 19:33:37.8 | +24:36:39.6 | 0.81 | 8.11e-15 | 40.9   | 5.86  | 2.55e+13 |
| 1293 | J1933-6211 | 19:33:32.4 | -62:11:46.8 | 0.00 | 3.87e-21 | 1.03   | 17.90 | 3.86e+8  |
| 1294 | J1934+2352 | 19:34:46.1 | +23:52:55.9 | 0.18 | 1.31e-13 | 11.35  | 9.94  | 2.83e+13 |
| 1295 | J1934+5219 | 19:34:23.8 | +52:19:57.6 | 0.57 | 8.4e-17  | 45.0   | 4.47  | 2.83e+12 |
| 1296 | J1935+1159 | 19:35:16.0 | +11:59:09.2 | 1.94 | 9.48e-16 | 286.0  | 1.33  | 5.9e+13  |
| 1297 | B1933+16   | 19:35:47.8 | +16:16:39.9 | 0.36 | 6e-15    | 9.1    | 17.68 | 4.89e+12 |
| 1298 | B1933+17   | 19:35:29.9 | +17:45:12.2 | 0.65 | 3.78e-16 | 15.0   | 14.40 | 2.23e+12 |
| 1299 | J1935+2025 | 19:35:41.9 | +20:25:40.1 | 0.08 | 6.08e-14 | 4.6    | 16.56 | 7.83e+12 |
| 1300 | B1935+25   | 19:37:01.2 | +25:44:13.4 | 0.20 | 6.43e-16 | 20.1   | 6.00  | 3.48e+12 |
| 1301 | J1937+2950 | 19:37:47.6 | +29:50:01.8 | 1.66 | 3.48e-15 | 120.0  | 2.86  | 4.87e+13 |
| 1302 | J1938+0650 | 19:37:53.4 | +06:50:06.0 | 1.12 | 5.68e-15 | 21.0   | 13.45 | 1.98e+13 |
| 1303 | J1938+2213 | 19:38:14.1 | +22:13:12.6 | 0.17 | 4.24e-14 | 12.0   | 9.08  | 1.7e+13  |
| 1304 | J1938+6604 | 19:38:56.9 | +66:04:31.7 | 0.02 | 1.95e-20 | 1.6    | 25.68 | 1.54e+9  |
| 1305 | B1937+24   | 19:39:05.5 | +24:42:55.6 | 0.65 | 1.83e-14 | 34.0   | 6.28  | 3.18e+13 |
| 1306 | J1941+0121 | 19:41:16.0 | +01:21:39.5 | 0.22 | 1.91e-16 | 34.0   | 3.77  | 3.13e+12 |
| 1307 | J1941+1026 | 19:41:32.3 | +10:26:25.6 | 0.91 | 9.96e-16 | 31.0   | 8.15  | 6.78e+12 |
| 1308 | J1941+1341 | 19:41:04.8 | +13:41:30.4 | 0.56 | 1.24e-15 | 33.0   | 6.03  | 8.23e+12 |
| 1309 | B1937-26   | 19:41:00.4 | -26:02:05.7 | 0.40 | 9.56e-16 | 11.0   | 15.44 | 2.36e+12 |
| 1310 | J1941+4320 | 19:41:58.9 | +43:20:06.3 | 0.84 | 1.15e-15 | 30.0   | 8.11  | 7.5e+12  |
| 1311 | B1939+17   | 19:42:01.0 | +17:43:28.3 | 0.70 | 1.01e-16 | 92.0   | 2.47  | 6.24e+12 |
| 1312 | J1942+3941 | 19:42:22.0 | +39:41:41.4 | 1.35 | 7.14e-17 | 113.63 | 2.74  | 6.59e+12 |
| 1313 | J1942+8106 | 19:42:54.6 | +81:06:17.3 | 0.20 | 3.69e-17 | 6.0    | 20.30 | 2.53e+11 |
| 1314 | J1943+0609 | 19:43:29.1 | +06:09:57.6 | 0.45 | 4.66e-16 | 21.0   | 8.46  | 3.14e+12 |
| 1315 | B1940-12   | 19:43:25.4 | -12:37:42.4 | 0.97 | 1.66e-15 | 22.0   | 11.93 | 6.22e+12 |
| 1316 | J1944+0907 | 19:44:09.3 | +09:07:23.0 | 0.01 | 1.73e-20 | 2.5    | 11.62 | 1.5e+9   |
| 1317 | B1941-17   | 19:44:05.2 | -17:50:11   | 0.84 | 9.86e-16 | 30.5   | 7.98  | 6.64e+12 |
| 1318 | B1942+17   | 19:44:31.8 | +17:55:42.4 | 2.00 | 7.3e-16  | 189.0  | 2.00  | 3.49e+13 |
| 1319 | B1942-00   | 19:45:28.3 | -00:40:58.1 | 1.05 | 5.35e-16 | 74.0   | 3.68  | 1.18e+13 |
| 1320 | B1943+18   | 19:45:36.1 | +18:34:20.1 | 1.07 | 2.42e-16 | 49.0   | 5.60  | 5.27e+12 |
| 1321 | J1946-1312 | 19:46:57.8 | -13:12:36.4 | 0.49 | 1.99e-15 | 19.0   | 9.82  | 5.87e+12 |
| 1322 | B1944+17   | 19:46:53.0 | +18:05:41.2 | 0.44 | 2.41e-17 | 51.0   | 3.52  | 1.7e+12  |
| 1323 | B1944+22   | 19:46:24.8 | +22:44:59.4 | 1.33 | 8.89e-16 | 37.0   | 8.28  | 7.65e+12 |
| 1324 | B1943-29   | 19:46:51.7 | -29:13:47.1 | 0.96 | 1.49e-15 | 23.0   | 11.33 | 6.16e+12 |
| 1325 | J1947+0915 | 19:47:46.2 | +09:15:08.0 | 1.48 | 4.78e-16 | 59.0   | 5.47  | 8.93e+12 |
| 1326 | B1946+35   | 19:48:25.0 | +35:40:11.0 | 0.72 | 7.06e-15 | 50.3   | 4.49  | 2.91e+13 |
| 1327 | B1946-25   | 19:49:25.4 | -25:24:01   | 0.96 | 3.27e-15 | 21.0   | 12.41 | 8.33e+12 |
| 1328 | J1949+3426 | 19:49:13.6 | +34:26:33.8 | 0.39 | 2.02e-16 | 53.0   | 3.20  | 5.72e+12 |
| 1329 | J1951+4724 | 19:51:07.4 | +47:24:35.1 | 0.18 | 3.01e-14 | 72.8   | 2.04  | 6.64e+13 |
| 1330 | B1951+32   | 19:52:58.2 | +32:52:40.5 | 0.04 | 5.84e-15 | 9.6    | 6.05  | 4.61e+12 |
| 1331 | J1953+1149 | 19:53:47.4 | +11:49:42.6 | 0.85 | 2.86e-15 | 23.0   | 10.67 | 8.53e+12 |
| 1332 | J1953+2732 | 19:53:07.8 | +27:32:48.2 | 1.33 | 1.77e-15 | 44.0   | 6.96  | 1.28e+13 |
| 1333 | B1952+29   | 19:54:22.5 | +29:23:17.2 | 0.43 | 1.71e-18 | 17.7   | 9.82  | 1.6e+11  |
| 1334 | J1954+3852 | 19:54:01.0 | +38:52:15.8 | 0.35 | 6.6e-15  | 10.0   | 15.91 | 5.63e+12 |
| 1335 | J1954+4357 | 19:54:38.4 | +43:57:37.3 | 1.39 | 2.2e-15  | 136.0  | 2.32  | 4.36e+13 |
| 1336 | B1953+29   | 19:55:27.8 | +29:08:43.4 | 0.01 | 2.97e-20 | 1.4    | 16.34 | 1.54e+9  |
| 1337 | B1953+50   | 19:55:18.7 | +50:59:55.2 | 0.52 | 1.37e-15 | 13.2   | 14.58 | 3.39e+12 |
| 1338 | J1955+6708 | 19:55:38.7 | +67:08:15.1 | 0.01 | 1.26e-20 | 1.0    | 25.86 | 7.62e+8  |
| 1339 | J1956+0838 | 19:56:52.2 | +08:38:16.8 | 0.30 | 2.2e-16  | 27.0   | 5.47  | 2.74e+12 |
| 1340 | J1957-0002 | 19:57:42.6 | -00:02:06.8 | 0.97 | 8.05e-16 | 28.4   | 9.19  | 5.59e+12 |
| 1341 | J1957+2831 | 19:57:19.3 | +28:31:43.8 | 0.31 | 3.11e-15 | 19.0   | 7.78  | 7.31e+12 |
| 1342 | J2001+4258 | 20:01:10.5 | +42:58:06.2 | 0.72 | 1.73e-14 | 20.0   | 11.28 | 1.82e+13 |
| 1343 | J2002+1637 | 20:02:47.7 | +16:37:16.7 | 0.28 | 2.25e-16 | 16.0   | 8.76  | 1.66e+12 |
| 1344 | B2000+32   | 20:02:04.4 | +32:17:18.3 | 0.70 | 1.05e-13 | 40.5   | 5.48  | 9.63e+13 |

|      |            |            |             |      |          |       |       |          |
|------|------------|------------|-------------|------|----------|-------|-------|----------|
| 1345 | B2000+40   | 20:02:44.0 | +40:50:53.9 | 0.91 | 1.74e-15 | 46.7  | 5.41  | 1.35e+13 |
| 1346 | B2003-08   | 20:06:16.3 | -08:07:02.1 | 0.58 | 4.6e-17  | 97.0  | 2.17  | 4.36e+12 |
| 1347 | J2006+4058 | 20:06:39.0 | +40:58:53.4 | 0.50 | 2.84e-16 | 19.0  | 9.90  | 2.22e+12 |
| 1348 | J2007+0910 | 20:07:58.1 | +09:10:12.9 | 0.46 | 3.32e-16 | 13.0  | 13.91 | 1.64e+12 |
| 1349 | J2008+2513 | 20:08:35.4 | +25:13:30.3 | 0.59 | 5.4e-15  | 32.0  | 6.38  | 1.62e+13 |
| 1350 | J2010-1323 | 20:10:45.9 | -13:23:56.0 | 0.01 | 4.83e-21 | 0.44  | 49.98 | 2.99e+8  |
| 1351 | J2010+2845 | 20:10:05.0 | +28:45:29.1 | 0.57 | 9.07e-17 | 23.0  | 8.69  | 1.52e+12 |
| 1352 | J2012-2029 | 20:12:46.6 | -20:29:31   | 0.54 | 5.48e-16 | 33.0  | 5.95  | 5.33e+12 |
| 1353 | J2013-0649 | 20:13:17.7 | -06:49:05.3 | 0.58 | 6.01e-16 | 24.0  | 8.43  | 4.74e+12 |
| 1354 | J2013+3058 | 20:13:34.2 | +30:58:50.6 | 0.28 | 1.52e-16 | 7.0   | 20.26 | 5.99e+11 |
| 1355 | B2011+38   | 20:13:10.3 | +38:45:43.3 | 0.23 | 8.85e-15 | 40.0  | 3.33  | 2.49e+13 |
| 1356 | J2016+1948 | 20:16:57.4 | +19:47:51.5 | 0.06 | 4.01e-19 | 2.9   | 23.97 | 1.27e+10 |
| 1357 | J2017+2043 | 20:17:28.9 | +20:43:31.9 | 0.54 | 9.96e-16 | 21.0  | 9.28  | 4.59e+12 |
| 1358 | J2017+5906 | 20:17:44.5 | +59:06:46.9 | 0.40 | 2.22e-16 | 69.0  | 2.55  | 6.8e+12  |
| 1359 | B2016+28   | 20:18:03.8 | +28:39:54.2 | 0.56 | 1.48e-16 | 22.2  | 8.94  | 1.87e+12 |
| 1360 | J2019+2425 | 20:19:31.9 | +24:25:15.3 | 0.00 | 7.02e-21 | 0.76  | 23.87 | 4.16e+8  |
| 1361 | J2021+3651 | 20:21:05.4 | +36:51:04.8 | 0.10 | 9.57e-14 | 18.0  | 4.97  | 3.68e+13 |
| 1362 | B2020+28   | 20:22:37.0 | +28:54:23.1 | 0.34 | 1.89e-15 | 15.8  | 9.88  | 4.75e+12 |
| 1363 | B2021+51   | 20:22:49.8 | +51:54:50.2 | 0.53 | 3.06e-15 | 29.4  | 6.58  | 1.12e+13 |
| 1364 | B2022+50   | 20:23:41.9 | +50:37:34.8 | 0.37 | 2.51e-15 | 14.9  | 10.91 | 5.17e+12 |
| 1365 | B2025+21   | 20:27:16.6 | +21:46:04.4 | 0.40 | 2.03e-16 | 21.0  | 8.00  | 2.68e+12 |
| 1366 | J2027+4557 | 20:27:16.2 | +45:57:57.0 | 1.10 | 3.09e-16 | 120.0 | 2.35  | 1.44e+13 |
| 1367 | J2027+7502 | 20:27:23.2 | +75:02:29.3 | 0.52 | 8.89e-16 | 88.0  | 2.26  | 1.74e+13 |
| 1368 | B2027+37   | 20:29:23.8 | +37:44:08.1 | 1.22 | 1.23e-14 | 43.9  | 6.66  | 3.37e+13 |
| 1369 | B2028+22   | 20:30:40.4 | +22:28:21.8 | 0.63 | 8.85e-16 | 30.0  | 7.03  | 6.17e+12 |
| 1370 | J2033-1938 | 20:33:55.4 | -19:38:59   | 1.28 | 4.55e-16 | 48.0  | 6.25  | 7.93e+12 |
| 1371 | J2036+2835 | 20:36:46.3 | +28:35:10.4 | 1.36 | 2.09e-15 | 36.0  | 8.59  | 1.14e+13 |
| 1372 | J2036+6646 | 20:36:52.3 | +66:46:20.7 | 0.50 | 9.4e-16  | 31.8  | 5.93  | 6.73e+12 |
| 1373 | B2035+36   | 20:37:27.4 | +36:21:24.1 | 0.62 | 4.5e-15  | 49.0  | 4.29  | 2.26e+13 |
| 1374 | J2038-3816 | 20:38:54.3 | -38:16:15.6 | 1.58 | 4.16e-15 | 42.0  | 7.93  | 1.88e+13 |
| 1375 | B2036+53   | 20:38:03.1 | +53:19:12.8 | 1.42 | 9.44e-16 | 54.0  | 5.86  | 1.15e+13 |
| 1376 | J2039-3616 | 20:39:16.6 | -36:16:17   | 0.00 | 8.43e-21 | 0.52  | 31.90 | 3.18e+8  |
| 1377 | J2040+1657 | 20:40:17.8 | +16:57:30.4 | 0.87 | 5.95e-16 | 79.0  | 3.15  | 1.32e+13 |
| 1378 | J2043+2740 | 20:43:43.5 | +27:40:56   | 0.10 | 1.27e-15 | 4.6   | 18.17 | 1.13e+12 |
| 1379 | J2044+4614 | 20:44:58.8 | +46:14:54   | 1.39 | 6.3e-16  | 212.0 | 1.53  | 3.56e+13 |
| 1380 | J2045+0912 | 20:45:47.3 | +09:12:29.1 | 0.40 | 1.95e-16 | 27.0  | 6.21  | 2.6e+12  |
| 1381 | B2043-04   | 20:46:00.1 | -04:21:26.2 | 1.55 | 1.47e-15 | 34.4  | 9.60  | 9.15e+12 |
| 1382 | B2044+15   | 20:46:39.3 | +15:40:33.5 | 1.14 | 1.82e-16 | 50.1  | 5.65  | 4.68e+12 |
| 1383 | B2045+56   | 20:46:46.6 | +57:08:37.0 | 0.48 | 1.11e-14 | 24.8  | 7.40  | 1.81e+13 |
| 1384 | B2045-16   | 20:48:35.6 | -16:16:44.5 | 1.96 | 1.1e-14  | 84.0  | 4.42  | 6.99e+13 |
| 1385 | J2048+2255 | 20:48:45.8 | +22:55:05.3 | 0.28 | 1.52e-17 | 18.0  | 7.89  | 4.84e+11 |
| 1386 | J2051-0827 | 20:51:07.5 | -08:27:37.7 | 0.00 | 1.27e-20 | 1.33  | 15.64 | 8.98e+8  |
| 1387 | B2048-72   | 20:53:47.2 | -72:00:42.4 | 0.34 | 1.98e-16 | 36.0  | 4.37  | 3.45e+12 |
| 1388 | B2053+21   | 20:55:39.1 | +22:09:27.2 | 0.82 | 1.34e-15 | 22.9  | 10.48 | 5.81e+12 |
| 1389 | B2053+36   | 20:55:31.3 | +36:30:21.4 | 0.22 | 3.69e-16 | 16.9  | 7.44  | 2.23e+12 |
| 1390 | J2108-3429 | 21:08:30.4 | -34:29:37.9 | 1.42 | 3.5e-15  | 25.0  | 12.71 | 1.26e+13 |
| 1391 | B2106+44   | 21:08:20.4 | +44:41:48.8 | 0.41 | 8.62e-17 | 102.0 | 1.85  | 5.94e+12 |
| 1392 | B2110+27   | 21:13:04.3 | +27:54:01.1 | 1.20 | 2.62e-15 | 23.6  | 12.37 | 8.38e+12 |
| 1393 | B2111+46   | 21:13:24.3 | +46:44:08.8 | 1.01 | 7.15e-16 | 152.8 | 1.81  | 2.73e+13 |
| 1394 | B2113+14   | 21:16:13.7 | +14:14:21.0 | 0.44 | 2.89e-16 | 22.0  | 8.02  | 2.59e+12 |
| 1395 | J2122+2426 | 21:22:39.0 | +24:26:44.9 | 0.54 | 1.27e-16 | 41.0  | 4.79  | 3.18e+12 |
| 1396 | J2123+5434 | 21:23:21.6 | +54:34:07.7 | 0.14 | 1.74e-19 | 7.0   | 14.26 | 2.19e+10 |
| 1397 | B2122+13   | 21:24:46.5 | +14:07:19.3 | 0.69 | 7.68e-16 | 29.0  | 7.63  | 5.56e+12 |
| 1398 | J2124-3358 | 21:24:43.8 | -33:58:45.0 | 0.00 | 2.06e-20 | 3.76  | 17.68 | 1.62e+9  |
| 1399 | B2123-67   | 21:27:31.2 | -66:48:28.1 | 0.33 | 2.26e-16 | 34.0  | 4.52  | 3.49e+12 |
| 1400 | B2127+11B  | 21:29:58.6 | +12:10:00.3 | 0.06 | 9.54e-18 | 7.5   | 8.62  | 1.56e+11 |
| 1401 | B2127+11C  | 21:30:01.2 | +12:10:38.2 | 0.03 | 4.99e-18 | 2.4   | 19.81 | 3.69e+10 |
| 1402 | B2127+11E  | 21:29:58.1 | +12:10:08.6 | 0.00 | 1.78e-19 | 1.4   | 15.18 | 3.52e+9  |
| 1403 | B2127+11H  | 21:29:58.1 | +12:09:59.4 | 0.01 | 2.4e-20  | 1.4   | 16.88 | 1.4e+9   |
| 1404 | J2129+4119 | 21:29:21.4 | +41:19:55   | 1.69 | 8.54e-17 | 62.6  | 5.50  | 4.81e+12 |
| 1405 | J2129-5721 | 21:29:22.7 | -57:21:14.2 | 0.00 | 2.09e-20 | 0.62  | 28.36 | 5.94e+8  |
| 1406 | J2136-1606 | 21:36:00.2 | -16:06:13.0 | 1.23 | 1.6e-17  | 62.0  | 4.74  | 1.71e+12 |
| 1407 | J2137+6428 | 21:37:20.2 | +64:28:41.8 | 1.75 | 3.43e-15 | 54.0  | 6.49  | 2.19e+13 |
| 1408 | J2139+2242 | 21:39:26.9 | +22:42:42.0 | 1.08 | 1.42e-15 | 48.0  | 5.75  | 1.25e+13 |
| 1409 | J2145-0750 | 21:45:50.4 | -07:50:18.5 | 0.02 | 2.98e-20 | 4.17  | 9.02  | 4.46e+9  |

|      |            |            |             |      |          |       |       |          |
|------|------------|------------|-------------|------|----------|-------|-------|----------|
| 1410 | B2148+63   | 21:49:58.7 | +63:29:44.2 | 0.38 | 1.68e-16 | 35.1  | 4.71  | 3.12e+12 |
| 1411 | B2148+52   | 21:50:37.7 | +52:47:49.5 | 0.33 | 1.01e-14 | 24.9  | 6.18  | 1.72e+13 |
| 1412 | J2151+2315 | 21:51:28.9 | +23:15:12.8 | 0.59 | 7.08e-16 | 68.0  | 3.06  | 1.23e+13 |
| 1413 | J2154-2812 | 21:54:17.3 | -28:12:41   | 1.34 | 6.13e-16 | 21.0  | 14.74 | 3.61e+12 |
| 1414 | J2155+2813 | 21:55:15.8 | +28:13:12.1 | 1.61 | 9.16e-16 | 42.0  | 8.01  | 8.82e+12 |
| 1415 | B2152-31   | 21:55:13.6 | -31:18:54.7 | 1.03 | 1.24e-15 | 31.0  | 8.69  | 7.57e+12 |
| 1416 | B2151-56   | 21:55:01.4 | -56:41:57   | 1.37 | 4.23e-15 | 90.0  | 3.46  | 4.36e+13 |
| 1417 | J2156+2618 | 21:56:23.7 | +26:18:30.4 | 0.50 | 1.42e-17 | 17.0  | 11.05 | 4.44e+11 |
| 1418 | B2154+40   | 21:57:01.8 | +40:17:45.9 | 1.53 | 3.43e-15 | 114.2 | 2.88  | 4.6e+13  |
| 1419 | J2205+1444 | 22:05:17.2 | +14:44:31.3 | 0.94 | 9e-16    | 58.0  | 4.44  | 1.2e+13  |
| 1420 | J2206+6151 | 22:06:18.1 | +61:51:58.1 | 0.32 | 3.97e-16 | 49.0  | 3.18  | 6.53e+12 |
| 1421 | J2208+4056 | 22:08:01.9 | +40:56:01.8 | 0.64 | 5.28e-15 | 61.0  | 3.51  | 3.32e+13 |
| 1422 | J2208+5500 | 22:08:23.7 | +55:00:08.4 | 0.93 | 6.99e-15 | 30.0  | 8.55  | 1.74e+13 |
| 1423 | B2210+29   | 22:12:23.3 | +29:33:05.4 | 1.00 | 4.95e-16 | 59.0  | 4.52  | 9.64e+12 |
| 1424 | J2214+3000 | 22:14:38.8 | +30:00:38.1 | 0.00 | 1.47e-20 | 0.77  | 21.73 | 5.85e+8  |
| 1425 | J2215+1538 | 22:15:39.6 | +15:38:34.8 | 0.37 | 2.37e-15 | 8.0   | 20.65 | 2.7e+12  |
| 1426 | J2217+5733 | 22:17:55.0 | +57:33:04.0 | 1.06 | 6.47e-16 | 100.0 | 2.76  | 1.74e+13 |
| 1427 | B2217+47   | 22:19:48.1 | +47:54:53.9 | 0.54 | 2.77e-15 | 13.1  | 14.97 | 4.78e+12 |
| 1428 | J2222-0137 | 22:22:05.9 | -01:37:15.7 | 0.03 | 5.8e-19  | 2.0   | 24.83 | 1.51e+10 |
| 1429 | J2222+2923 | 22:23:03.2 | +29:23:58.6 | 0.28 | 6.17e-18 | 22.0  | 6.44  | 3.76e+11 |
| 1430 | B2224+65   | 22:25:52.8 | +65:35:36.3 | 0.68 | 9.66e-15 | 33.4  | 6.57  | 2.27e+13 |
| 1431 | J2228+6447 | 22:28:40.5 | +64:47:19.4 | 1.89 | 6.7e-16  | 75.0  | 4.86  | 1.34e+13 |
| 1432 | J2229+2643 | 22:29:50.8 | +26:43:57.6 | 0.00 | 1.52e-21 | 0.8   | 20.79 | 1.92e+8  |
| 1433 | J2229+6114 | 22:29:05.2 | +61:14:09.3 | 0.05 | 7.83e-14 | 18.0  | 4.11  | 2.84e+13 |
| 1434 | B2227+61   | 22:29:41.8 | +62:05:36.0 | 0.44 | 2.26e-15 | 35.3  | 5.04  | 1.15e+13 |
| 1435 | J2234+2114 | 22:34:56.6 | +21:14:18.8 | 1.36 | 2.22e-16 | 277.0 | 1.19  | 2.67e+13 |
| 1436 | J2235+1506 | 22:35:43.7 | +15:06:49.0 | 0.06 | 1.58e-19 | 3.94  | 16.74 | 1.8e+10  |
| 1437 | J2236-5527 | 22:36:51.8 | -55:27:48.8 | 0.01 | 9.6e-21  | 0.98  | 23.86 | 6.44e+8  |
| 1438 | J2241+6941 | 22:41:20.3 | +69:41:59.7 | 0.86 | 2.69e-15 | 12.0  | 20.81 | 4.32e+12 |
| 1439 | B2241+69   | 22:42:56.4 | +69:50:52.1 | 1.66 | 4.82e-15 | 56.1  | 6.09  | 2.7e+13  |
| 1440 | J2243+1518 | 22:43:09.7 | +15:18:25.1 | 0.60 | 1.13e-16 | 29.0  | 7.08  | 2.13e+12 |
| 1441 | J2248-0101 | 22:48:26.8 | -01:01:48.0 | 0.48 | 6.59e-16 | 17.0  | 10.82 | 3.24e+12 |
| 1442 | J2253+1516 | 22:53:14.5 | +15:16:37.8 | 0.79 | 6.65e-17 | 46.0  | 5.14  | 2.59e+12 |
| 1443 | J2256-1024 | 22:56:56.3 | -10:24:34.3 | 0.00 | 1.14e-20 | 0.38  | 37.44 | 2.69e+8  |
| 1444 | B2255+58   | 22:57:57.7 | +59:09:14.8 | 0.37 | 5.75e-15 | 32.2  | 5.05  | 1.67e+13 |
| 1445 | J2302+4442 | 23:02:46.9 | +44:42:22.0 | 0.01 | 1.39e-20 | 1.4   | 15.55 | 1.14e+9  |
| 1446 | J2302+6028 | 23:02:11.2 | +60:28:00.2 | 1.21 | 2.04e-15 | 36.0  | 8.09  | 1.13e+13 |
| 1447 | B2303+30   | 23:05:58.3 | +31:00:01.2 | 1.58 | 2.89e-15 | 34.1  | 9.77  | 1.27e+13 |
| 1448 | B2303+46   | 23:05:55.8 | +47:07:45.3 | 1.07 | 5.69e-16 | 60.0  | 4.57  | 9.89e+12 |
| 1449 | J2307+2225 | 23:07:41.2 | +22:25:50.1 | 0.54 | 8.7e-18  | 21.0  | 9.27  | 4.29e+11 |
| 1450 | B2306+55   | 23:08:13.8 | +55:47:36.0 | 0.48 | 1.99e-16 | 34.5  | 5.33  | 3.35e+12 |
| 1451 | J2312+6931 | 23:12:38.9 | +69:31:04.0 | 0.81 | 6.28e-16 | 32.0  | 7.48  | 5.55e+12 |
| 1452 | B2310+42   | 23:13:08.6 | +42:53:13.0 | 0.35 | 1.12e-16 | 14.6  | 10.78 | 1.7e+12  |
| 1453 | J2317+1439 | 23:17:09.2 | +14:39:31.2 | 0.00 | 2.43e-21 | 0.68  | 25.12 | 2.18e+8  |
| 1454 | B2315+21   | 23:17:57.8 | +21:49:48.0 | 1.44 | 1.05e-15 | 34.0  | 9.38  | 7.64e+12 |
| 1455 | J2319+6411 | 23:19:35.2 | +64:11:25.7 | 0.22 | 1.63e-16 | 78.0  | 1.97  | 5.52e+12 |
| 1456 | J2322+2057 | 23:22:22.3 | +20:57:02.6 | 0.00 | 9.66e-21 | 0.6   | 33.12 | 3.99e+8  |
| 1457 | J2325-0530 | 23:25:15.3 | -5:30:39    | 0.87 | 1.03e-15 | 26.0  | 9.52  | 5.79e+12 |
| 1458 | B2323+63   | 23:25:13.3 | +63:16:52.3 | 1.44 | 2.83e-15 | 150.0 | 2.15  | 5.44e+13 |
| 1459 | B2324+60   | 23:26:58.6 | +61:13:36.4 | 0.23 | 3.53e-16 | 22.9  | 5.67  | 2.94e+12 |
| 1460 | J2329+4743 | 23:29:31.5 | +47:43:39.7 | 0.73 | 1.6e-17  | 17.0  | 13.39 | 4.72e+11 |
| 1461 | B2327-20   | 23:30:26.8 | -20:05:29.6 | 1.64 | 4.63e-15 | 32.0  | 10.65 | 1.51e+13 |
| 1462 | J2333+6145 | 23:33:19.4 | +61:45:30.0 | 0.76 | 1.18e-15 | 97.0  | 2.43  | 2.25e+13 |
| 1463 | B2334+61   | 23:37:05.7 | +61:51:01.5 | 0.50 | 1.93e-13 | 35.7  | 5.26  | 1.8e+14  |
| 1464 | J2338+4818 | 23:38:06.1 | +48:18:32.1 | 0.12 | 1.97e-18 | 8.34  | 11.07 | 8.63e+10 |
| 1465 | J2346-0609 | 23:46:50.4 | -06:09:59.8 | 1.18 | 1.36e-15 | 61.0  | 4.73  | 1.56e+13 |
| 1466 | J2351+8533 | 23:51:03   | +85:33:20.6 | 1.01 | 8.8e-16  | 33.0  | 8.09  | 6.79e+12 |
| 1467 | B2351+61   | 23:54:04.7 | +61:55:46.8 | 0.94 | 1.63e-14 | 37.0  | 6.97  | 3.27e+13 |
| 1468 | J2355+2246 | 23:55:49.8 | +22:46:17   | 1.84 | 3.78e-15 | 115.0 | 3.14  | 4.88e+13 |
